# Supplementary material for: Development of a nomogram for the prediction of in-hospital mortality in patients with acute ST-elevation myocardial infarction after primary percutaneous coronary intervention: a multicentre, retrospective, observational study in Hebei province, China
Source: PubMed Central journal article supplement — BMJ Open. 2022 Feb 2;12(2):e056101. doi: 10.1136/bmjopen-2021-056101 (PMC8811571; doi:10.1136/bmjopen-2021-056101), 2022-02-02
Supplement: bmjopen-2021-056101.draft_revisions.pdf [file bmjopen-2021-056101.draft_revisions.pdf]

# BMJ Open

BMJ Open is committed to open peer review. As part of this commitment we make the peer review history of every article we publish publicly available.

When an article is published we post the peer reviewers' comments and the authors' responses online. We also post the versions of the paper that were used during peer review. These are the versions that the peer review comments apply to.

The versions of the paper that follow are the versions that were submitted during the peer review process. They are not the versions of record or the final published versions. They should not be cited or distributed as the published version of this manuscript.

BMJ Open is an open access journal and the full, final, typeset and author-corrected version of record of the manuscript is available on our site with no access controls, subscription charges or pay-per-view fees (<http://bmjopen.bmj.com>).

If you have any questions on BMJ Open's open peer review process please email [info.bmjopen@bmj.com](mailto:info.bmjopen@bmj.com)

# BMJ Open

## A nomogram for the prediction of in-hospital mortality in patients with acute ST-elevation myocardial infarction after primary percutaneous coronary intervention

|                               |                                                                                                                                                                                                                                                                                                                                                                                                                                                                                                                                                                                                                                          |
|-------------------------------|------------------------------------------------------------------------------------------------------------------------------------------------------------------------------------------------------------------------------------------------------------------------------------------------------------------------------------------------------------------------------------------------------------------------------------------------------------------------------------------------------------------------------------------------------------------------------------------------------------------------------------------|
| Journal:                      | <i>BMJ Open</i>                                                                                                                                                                                                                                                                                                                                                                                                                                                                                                                                                                                                                          |
| Manuscript ID                 | bmjopen-2021-056101                                                                                                                                                                                                                                                                                                                                                                                                                                                                                                                                                                                                                      |
| Article Type:                 | Original research                                                                                                                                                                                                                                                                                                                                                                                                                                                                                                                                                                                                                        |
| Date Submitted by the Author: | 06-Aug-2021                                                                                                                                                                                                                                                                                                                                                                                                                                                                                                                                                                                                                              |
| Complete List of Authors:     | Wang, Yudan; Hebei Medical University, School of Graduate; Hebei General Hospital, Department of Cardiology Center<br>Gao, Man; Hebei Medical University, School of Graduate<br>Jia, Shengqi; Hebei Medical University, School of Graduate<br>Zheng, Shihang; Hebei North University, School of Graduate<br>Wang, Jiaqi; Hebei North University, School of Graduate<br>Dang, Yi; Hebei General Hospital, Department of Cardiology Center<br>Li, Yingxiao; Hebei General Hospital, Department of Cardiology Center<br>Qi, Xiaoyong; Hebei Medical University, School of Graduate; Hebei General Hospital, Department of Cardiology Center |
| Keywords:                     | Coronary intervention < CARDIOLOGY, Coronary heart disease < CARDIOLOGY, Myocardial infarction < CARDIOLOGY                                                                                                                                                                                                                                                                                                                                                                                                                                                                                                                              |
|                               |                                                                                                                                                                                                                                                                                                                                                                                                                                                                                                                                                                                                                                          |

SCHOLARONE™  
Manuscripts

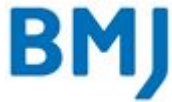

I, the Submitting Author has the right to grant and does grant on behalf of all authors of the Work (as defined in the below author licence), an exclusive licence and/or a non-exclusive licence for contributions from authors who are: i) UK Crown employees; ii) where BMJ has agreed a CC-BY licence shall apply, and/or iii) in accordance with the terms applicable for US Federal Government officers or employees acting as part of their official duties; on a worldwide, perpetual, irrevocable, royalty-free basis to BMJ Publishing Group Ltd ("BMJ") its licensees and where the relevant Journal is co-owned by BMJ to the co-owners of the Journal, to publish the Work in this journal and any other BMJ products and to exploit all rights, as set out in our [licence](#).

The Submitting Author accepts and understands that any supply made under these terms is made by BMJ to the Submitting Author unless you are acting as an employee on behalf of your employer or a postgraduate student of an affiliated institution which is paying any applicable article publishing charge ("APC") for Open Access articles. Where the Submitting Author wishes to make the Work available on an Open Access basis (and intends to pay the relevant APC), the terms of reuse of such Open Access shall be governed by a Creative Commons licence – details of these licences and which [Creative Commons](#) licence will apply to this Work are set out in our licence referred to above.

Other than as permitted in any relevant BMJ Author's Self Archiving Policies, I confirm this Work has not been accepted for publication elsewhere, is not being considered for publication elsewhere and does not duplicate material already published. I confirm all authors consent to publication of this Work and authorise the granting of this licence.

1  
2  
3 **A nomogram for the prediction of in-hospital mortality in patients with acute ST-**  
4 **elevation myocardial infarction after primary percutaneous coronary intervention**  
5  
6  
7  
8  
9

10 **Running title:** Nomogram for STEMI in-hospital mortality after PCI  
11  
12  
13

14 **Yudan Wang<sup>1,2</sup>, Man Gao<sup>1</sup>, Shengqi Jia<sup>1</sup>, Shihang Zheng<sup>3</sup>, Jiaqi Wang<sup>3</sup>, Yi Dang<sup>2</sup>,**  
15 **Yingxiao Li<sup>2</sup>, Xiaoyong Qi<sup>1,2,\*</sup>**  
16  
17  
18

19 <sup>1</sup>School of Graduate, Hebei Medical University, Shijiazhuang, Hebei Province, People's  
20 Republic of China  
21  
22

23 <sup>2</sup>Department of Cardiology Center, Hebei General Hospital, Shijiazhuang, Hebei Province,  
24 People's Republic of China  
25  
26

27 <sup>3</sup>School of Graduate, Hebei North University, Zhangjiakou, Hebei Province, People's  
28 Republic of China  
29  
30  
31

32  
33  
34  
35 **\*Corresponding Author**  
36

37 Xiaoyong Qi  
38

39 School of Graduate, Hebei Medical University, Shijiazhuang, Hebei Province, People's  
40 Republic of China  
41  
42

43 Department of Cardiology Center, Hebei General Hospital, No. 348, Heping West Road,  
44 Shijiazhuang 050051, Hebei Province, People's Republic of China  
45  
46

47 E-mail address: hbghqxy@126.com  
48  
49  
50

51  
52  
53 **Word count:** 2720  
54  
55  
56

## ABSTRACT

**Objectives:** To establish a clinical prognostic nomogram for predicting in-hospital mortality after primary percutaneous coronary intervention (PCI) among patients with ST-elevation myocardial infarction (STEMI).

**Design:** Retrospective, multicenter, observational study.

**Setting:** Thirty-nine hospitals in Hebei Province.

**Participants:** Patients with STEMI who underwent PCI from January 2018 to December 2019.

**Interventions:** A multivariable logistic regression model was used to identify the factors associated with in-hospital mortality. Then, they were incorporated into a nomogram. The performance of the nomogram was evaluated by the discrimination, calibration, and clinical usefulness.

**Primary and secondary outcome measures:** The outcome was the factors associated with in-hospital mortality.

**Results:** This study included 855 patients, among whom 223 died in hospital. Age, Body Mass Index (BMI), systolic pressure on admission, hemoglobin, random blood glucose on admission, ejection fraction after PCI, use aspirin before admission, long lesions, thrombolysis in myocardial infarction (TIMI) flow grade, and neutrophils/lymphocytes ratio (N/L ratio) were independently associated with in-hospital mortality (all  $P < 0.05$ ). In the training set, the nomogram showed a C-index of 0.947, goodness-of-fit of 0.683, and area under the receiver operating characteristic curve (AUC) of 0.947 (95%CI=0.927-0.967). In the testing set, the C-index was 0.891, goodness-of-fit was 0.462, and AUC was 0.891 (95%CI=0.844-0.939). The results indicate that the nomogram had good

1  
2  
3 discrimination and good prediction accuracy and could achieve a good net benefit.  
4

5 **Conclusions:** A nomogram that provides an individual prediction of in-hospital mortality  
6  
7 for patients with STEMI after PCI in a Chinese population was established and validated.  
8  
9

10  
11  
12 **Keywords:** nomogram; ST-elevated myocardial infarction; percutaneous coronary  
13  
14 intervention; in-hospital mortality  
15  
16

### 17 18 19 **ARTICLE SUMMARY** 20

- 21 - This study included 39 tertiary centers and 855 patients, including 223 (26.1%) who  
22 met the outcome.  
23
- 24 - The data were obtained retrospectively, which can lead to less reliable information.  
25
- 26 - Other potential risk factors in our study, such as LVEF before PCI, could not be  
27  
28 included in the analyses.  
29  
30  
31  
32  
33  
34  
35  
36  
37  
38  
39  
40  
41  
42  
43  
44  
45  
46  
47  
48  
49  
50  
51  
52  
53  
54  
55  
56  
57  
58  
59  
60

## INTRODUCTION

ST-segment elevation myocardial infarction (STEMI), a type of coronary artery disease (CAD), is a common clinical emergency and critical illness [1]. STEMI is most often caused by plaque rupture of an atherosclerotic lesion in the affected (culprit) coronary artery followed by total occlusion of the vessel lumen with a thrombus [2, 3]. Common risk factors for CAD, including STEMI, are tobacco abuse, dyslipidemias, hypertension, diabetes mellitus, and a family history of CAD [4]. Myocardial infarction is the main cause of global morbidity, mortality, and major cardiovascular events (MACEs), representing 15% of the annual deaths worldwide [5]. In recent years, with the diagnosis and treatment guidelines, the continuous standardization of the treatment of STEMI, the increasing evidence of determinants of patient prognosis, and the continuous development of emerging technologies have contributed to a reduction in mortality; still, mortality seems to have plateaued [3].

Primary percutaneous coronary intervention (PCI) has become the preferred reperfusion strategy in patients with STEMI according to the current clinical guidelines for STEMI in the United States and Europe [6, 7]. Nevertheless, even if such patients receive timely PCI and/or appropriate antiplatelet drugs, the prognosis is still poor, and a substantial number of patients still die in-hospital after PCI. About 6% of STEMI patients die in the hospital [3, 8, 9]. Therefore, there is still room for improving the short-term outcomes after PCI.

Various studies examined the risk factors of short- and long-term mortality of STEMI patients after PCI [10-12]. Guidelines encourage the use of clinical scores such as the thrombolysis in myocardial infarction (TIMI) or The Global Registry of Acute Coronary Events (GRACE) for STEMI to assess early- and long-term risk [6, 7, 13]. Several

1  
2  
3 biomarkers have been reported to confer independent prognostic information after STEMI,  
4 including Cardiac Troponin (cTn), Brain Natriuretic Peptide (BNP), amino-terminal pro-  
5 Brain Natriuretic Peptide (NT-proBNP), and D-dimer [14-17]. Unfortunately, these studies  
6 often exclude patients with advanced age, liver or kidney dysfunction, and other  
7 comorbidities and complications. Therefore, the generalizability of those studies is limited,  
8 and it is difficult to summarize and reflect the real-world treatment situation  
9 comprehensively.  
10  
11  
12  
13  
14  
15  
16  
17  
18

19 Therefore, the objective of this study was to develop a clinical nomogram for predicting  
20 in-hospital mortality of patients with STEMI after PCI. The results could provide clinical  
21 guidance and improve the outcome of STEMI patients.  
22  
23  
24  
25  
26  
27  
28  
29  
30  
31  
32  
33  
34  
35  
36  
37  
38  
39  
40  
41  
42  
43  
44  
45  
46  
47  
48  
49  
50  
51  
52  
53  
54  
55  
56  
57  
58  
59  
60



## **PATIENTS AND METHODS**

### **Study design and patients**

This multicenter, retrospective, observational study included STEMI patients treated with PCI at 39 PCI hospitals in Hebei Province from January 2018 to December 2019. The training set patients enrolled from January 2018 to December 2018 and the testing set patients enrolled from January 2019 to December 2019.

All patients met the diagnostic criteria of acute STEMI based on their symptoms and/or ECG, myocardial damage markers and other test results and underwent primary PCI according to the 2017 ESC guidelines for the management of STEMI [6], namely with persistent chest discomfort or other symptoms suggestive of ischemia and ST-segment elevation in at least two contiguous leads. Patients with non-ST segment myocardial infarction (NSTEMI) or unstable angina or STEMI patients who did not undergo PCI were excluded.

The study was approved by the Ethics Committees of Hebei General Hospital as the lead center and the ethics committee of each participating hospital. The requirement for informed consent was waived by the committee. The study was conducted according to the tenets of the Declaration of Helsinki for Medical Research Involving Human Subjects and Good Clinical Practice.

### **Patient and Public Involvement**

Patients or the public were not involved in the design or reporting or dissemination plans of our research as this study is a retrospective, observational study. Patients were involved in the conduct of the trial by sharing medical records during the visits.

## Data collection

Demographics (age, sex, and BMI), medical history (hypertension, diabetes mellitus, atrial fibrillation (AF), hypertension and family history of coronary artery disease (CAD), stroke, renal failure, and peripheral artery disease), angiographic characteristics and information of cardiac procedures (disease condition, TIMI flow grade, number and length of stents, use of intra-aortic balloon pump (IABP), use of temporary pacemaker, use of ventilator, and whether there was no-reflow, coronary perforation, and cardiac arrest), medications on admission (antiplatelet agents,  $\beta$ -blockers, nitrate, angiotensin-converting enzyme inhibitors (ACEI), angiotensin receptor blockers (ARB), and statin), biochemical markers (N/L ratio), hematocrit (HCT), hemoglobin (HGB), platelets (PLT), and random blood glucose on admission), and left ventricular ejection fraction (LVEF) after PCI were extracted from the medical charts. All treatments were according to the current guidelines.

## Nomogram construction

Demographics, medical history, vital signs before and after PCI, and auxiliary examinations were evaluated using univariable logistic regression. Variables with  $P < 0.05$  in the univariable logistic analyses were included for multivariable logistic analysis and nomogram construction. Receiver operator characteristic (ROC) curve analysis was used to quantify the prediction performance of the nomogram. A calibration curve was used to evaluate the calibration of the nomogram, and its goodness of fit was assessed using the Hosmer-Lemeshow test. Finally, the clinical usefulness of the nomogram was assessed using a decision curve analysis (DCA).

## Statistical analysis

Statistical analyses were performed using R version 4.0.3 (R Foundation for Statistical Computing) with RStudio (version 1.3.959; RStudio, Auckland, New Zealand). R packages used in this study were rms, reader, tableone, pROC, ResourceSelection, and rmda. The predictive accuracy of the nomogram was measured using the C-statistic (Bootstrap method, 1000 times). Calibration was evaluated using the Hosmer-Lemeshow statistic. Categorical variables were presented as frequencies with percentages, normally distributed continuous variables as means  $\pm$  SD, and other data as medians with interquartile ranges (IQRs). Categorical variables were compared using the chi-square test or Fisher's test if the expected cell count was  $<5$ . Student's t-test was used to compare normally distributed continuous variables. Otherwise, the Mann-Whitney U-test was used. The significance level was set at 0.05, and two-sided tests were used.

## RESULTS

### Characteristics of the patients

The whole study population consisted of 855 patients diagnosed with STEMI and who underwent PCI, including 396 in the training set (132 (33.3%) dead patients and 264 (66.7%) survivors) and 459 (91 (19.8%) dead patients, and 368 (80.2%) survivors) in the test set (Figure 1). The clinical characteristics, including demographic, medical history, angiographic characteristics, and information of cardiac procedures, medications, and biochemical markers, are summarized in Table 1. The patients who died in the hospital were older ( $69.8 \pm 10.2$  vs.  $60.2 \pm 12.6$  years,  $P < 0.01$ ), more likely to be women (32.7% vs. 21.5%,  $P < 0.01$ ), and more had complications like hypertension, AF, and hyperlipidemia.

### Nomogram construction

According to the multivariable logistic analysis, the 10 variables were found to meet the threshold of  $P < 0.05$ . Age (OR=1.069, 95% CI=1.048-1.092,  $P=0.049$ ), BMI (OR=0.55, 95% CI=0.31-0.87,  $P=0.019$ ), SBP on admission (OR=0.92, 95% CI=0.86-0.97,  $P=0.009$ ), HGB (OR=0.85, 95% CI=0.73-0.97,  $P=0.017$ ), random blood glucose on admission (OR=1.53, 95% CI=1.13-2.21,  $P=0.011$ ), EF after PCI (OR=0.89, 95% CI=0.80-0.97,  $P=0.015$ ), aspirin (OR=0.001, 95% CI=0.009-0.04,  $P=0.001$ ), N/L ratio (OR=1.34, 95% CI=1.12-1.69,  $P=0.004$ ), long lesions (OR=2.00, 95% CI=1.310-3.084,  $P < 0.001$ ), and TIMI flow grade (OR=2.15, 95% CI=1.242-3.900,  $P=0.008$ ) were independently associated with in-hospital mortality after PCI of STEMI (Table 2). The nomogram is shown in Figure 2. The formula for calculating the total point of the nomogram is  $15.5628 + 0.0320 \times \text{age} - 0.2991 \times \text{BMI} - 0.0184 \times \text{SBP} - 0.0331 \times \text{HGB} + 0.3663 \times \text{random blood}$

1  
2  
3 glucose on admission-0.1188×LVEF after PCI-4.7705×aspirin+0.0521×N/L ratio-  
4  
5 2.4688×long lesions+5.1018×TIMI flow grade.  
6  
7  
8  
9

### 10 **Evaluation of the nomogram**

11  
12 In the training set, the C-index was 0.947, indicating that the prediction model was valuable  
13  
14 in clinical practice (Figure 3a). The value of goodness-of-fit was 0.683, indicating a good  
15  
16 prediction accuracy. The ROC curve is shown in Figure 4a (AUC=0.947, 95% CI: 0.927-  
17  
18 0.967). Figure 5a shows the DCA curve for the training set, indicating that the nomogram  
19  
20 had a high overall net benefit in predicting in-hospital mortality after PCI treatment.  
21  
22

23  
24 In the testing set, the C-index was 0.891. Figure 3b shows the calibration curve, and the  
25  
26 value of goodness-of-fit was 0.462. The ROC curve is shown in Figure 4b (AUC=0.891,  
27  
28 95% CI: 0.844-0.939). The DCA curve is shown in Figure 5b. The results of the testing set  
29  
30 indicate that the nomogram had good discrimination and good prediction accuracy and  
31  
32 could achieve a good net benefit.  
33  
34  
35  
36  
37  
38  
39  
40  
41  
42  
43  
44  
45  
46  
47  
48  
49  
50  
51  
52  
53  
54  
55  
56  
57  
58  
59  
60

## DISCUSSION

In this study, a relatively accurate clinical nomogram was constructed, which demonstrated adequate discrimination and calibration power to provide an individualized estimation for the in-hospital mortality in STEMI patients after PCI. For the construction of the nomogram, 10 significant predictors were screened by multivariable logistic analysis.

In this study, men with STEMI overall experienced a lower unadjusted in-hospital mortality than women (OR=0.503, 95%CI: 0.320-0.792), but the difference became non-significant after multivariable adjustments. Age was an independent risk factor of STEMI patients, in accordance with other analyses of STEMI patients and underlining the high-risk profile of elderly patients, as they usually present with more risk factors and comorbidities than younger patients [18, 19]. High mortality in the older patients might also result from end-organ dysfunction, competing risks might also offset the benefits from reperfusion, such that successful outcomes are more dependent on overall health issues. In accordance with previous studies [8, 10, 12, 19-23], predictors for a worse clinical outcome are associated with age, such as the higher prevalence of renal insufficiency, lower LVEF, and longer delay times. Therefore, for older patients, some authors have also questioned the benefit of reperfusion therapy [20]. This point is of great importance as Medina et al. [24] reported that patients undergoing primary PCI or thrombolysis had lower in-hospital mortality compared with the no reperfusion strategy.

The present study showed that a lower BMI was an independent risk factor for in-hospital death. The previous view is that obesity increases insulin resistance, worsens plasma lipid profiles, and increases arterial blood pressure, and thus has adverse effects on patients with CAD through the indirect effects of other risk factors (such as hypertension, impaired

1  
2  
3 glucose tolerance, and hyperinsulinemia) [25]. Therefore, obese patients demonstrate  
4 greater adverse left ventricle (LV) remodeling and more impaired LV deformation after  
5 STEMI compared with those similar infarct characteristics but normal BMI [21, 26].  
6  
7 Interestingly, on the other hand, some studies have shown the so-called “obesity paradox”,  
8 whereby obesity is related to better clinical outcomes [23, 25, 27, 28], consistent with the  
9 present study. Fukuoka et al. [29] reported that this phenomenon is only observed in elderly  
10 patients, not in younger patients, so the influence of BMI on risk factors for death might  
11 vary with age. Nevertheless, obesity is currently recognized as a risk factor for the long-  
12 term prognosis of patients with CAD, and it is worth recommending maintaining BMI at a  
13 normal level [29].  
14  
15

16  
17 As a key factor in the inflammatory response, neutrophils play an irreplaceable role in  
18 STEMI. Lymphocytes reflect the body’s stress level. Acute stress has been shown to  
19 regulate the immune response of lymphocytes and reduce the number of peripheral blood  
20 lymphocytes. The smaller the value, the higher the body’s stress level. Therefore, the N/L  
21 ratio is an index for systemic inflammatory status and usually increases after STEMI [30-  
22 32]. Pan et al. [33] demonstrated the independent association between increased N/L ratio  
23 and short-term mortality in STEMI patients after PCI. The predictive value of the N/L ratio  
24 may be based on the following reasons. Stimulated neutrophils release superoxide radicals,  
25 proteolytic enzymes, and arachidonic acid metabolites that increase the infarct size and  
26 lead to cardiac electrical instability by damaging endothelial cells, activating coagulation  
27 cascade, aggregation of leukocytic cells, and plugging the micro-arteries [34]. These  
28 actions will participate in the extension of the areas of myocardial infarction, impaired  
29 epicardial and microvascular perfusion, no-reflow/slow flow during PCI, decreased  
30  
31  
32  
33  
34  
35  
36  
37  
38  
39  
40  
41  
42  
43  
44  
45  
46  
47  
48  
49  
50  
51  
52  
53  
54  
55  
56  
57  
58  
59  
60

1  
2  
3 ejection fraction (LVEF), and post-infarction death [35-37].  
4

5 The acute phase of STEMI leads to insulin resistance, glucose intolerance, and  
6 hyperglycemia. The elevated levels of cytokines, growth hormone, glucagon, and cortisol  
7 result in increased hepatic glucose production. Hepatic glycogenolysis is further enhanced  
8 by catecholamines that also inhibit glycogenesis and stimulate the release of free fatty acids  
9 (FFAs). High concentrations of FFAs will increase myocardial oxygen requirement, reduce  
10 myocardial activity and contractility, impair calcium homeostasis and increase the  
11 production of free radicals, leading to an increased risk of myocardial damage and  
12 arrhythmias [38-41]. Thus, acute hyperglycemia is associated with adverse metabolic  
13 effects that might contribute to a poor outcome. Previous studies reported that higher  
14 admission glucose was strongly correlated with larger infarct size, lower LVEF, and  
15 increased mortality risk in patients with and without diabetes [22, 42]. Exercise training,  
16 dietary modifications, and medical intervention might reduce the mortality risk in such  
17 patients. Intervention in the hospital, such as tight glycemic control during early PCI or at  
18 least within 24 h after STEMI, is also beneficial [43, 44].  
19  
20  
21  
22  
23  
24  
25  
26  
27  
28  
29  
30  
31  
32  
33  
34  
35  
36

37 Lower admission HGB was associated with higher in-hospital mortality when analyzed as  
38 a continuous variable (OR=0.966, 95%CI: 0.954-0.978). The time from onset of precordial  
39 pain to coronary angiography in patients with AMI is inversely proportional to the drop in  
40 HGB concentration [45]. HGB levels and inflammation are closely related; in patients with  
41 inflammation, an abundance of hepcidin leads to poor uptake of iron from the  
42 gastrointestinal tract, iron sequestration in macrophages, little iron recycling to the erythron  
43 for red-cell production, and microcytic anemia, and this process is termed inflammatory  
44 block [46].  
45  
46  
47  
48  
49  
50  
51  
52  
53  
54  
55  
56  
57  
58  
59  
60



1  
2  
3 Because of the important role of platelets in thrombus formation, the present study showed  
4 that prior aspirin use could reduce in-hospital mortality of STEMI patients after PCI, as  
5 supported by earlier clinical trials [47, 48]. Weidmann et al. [48] provided evidence  
6 suggesting that pre-existing treatment with aspirin favorably affected the clinical  
7 presentation, infarct size, and degree of inflammation of patients with STEMI. Yonetsu et  
8 al. [49] reported that aspirin inhibits platelet aggregation and therefore reduces the  
9 probability of an occluding clot on top of a ruptured plaque and, conversely, the occurrence  
10 of STEMI. Despite these proven benefits, some studies revealed the existence of an “aspirin  
11 paradox”, namely that prior aspirin use may predispose to worse outcomes than those not  
12 previously taking aspirin, such as recurrent MI and ischemic events [50, 51].

13  
14 Previous studies indicated that lesion length is associated with long-term adverse events  
15 after PCI and is an important risk factor for restenosis and stent thrombosis [52-54]. A  
16 longer lesion, with its greater plaque burden, is conceived to provide a major source of  
17 smooth muscle cells that will then proliferate to form neointima. Atherosclerotic plaques  
18 have often been found to demonstrate an increased expression of isoforms characteristic of  
19 activated smooth muscle cells that are not present in normal vasculature [55]. Still, there  
20 are few studies on lesion length and in-hospital mortality, and further studies are still  
21 necessary. Preprocedural reperfusion might have a prognostic value [56]. A strong  
22 relationship exists between preprocedural TIMI flow grade and infarct size and  
23 predischage LVEF [57]. SBP is a critical factor, and hypotension was associated with a  
24 decrease in survival [58].

25  
26 A nomogram is a simple and intuitive representation of a mathematical model that allows  
27 calculating clinical scores [59]. In addition, to be of clinical usefulness in a routine setting,

1  
2  
3 the nomogram must contain variables assessed in the routine clinical setting, which is the  
4 case with the nomogram developed here. The results indicate that the nomogram had good  
5 discrimination and good prediction accuracy and could achieve good net benefit. Another  
6 nomogram based on other variables (left main coronary artery disease, grading of thrombus,  
7 TIMI classification, slow flow, use of IABP, use of  $\beta$ -blocker, use of ACEI/ARB,  
8 symptom-to-door time, symptom-to-balloon time, syntax score, LVEF, and CK-MB peak)  
9 also showed a high AUC for in-hospital mortality of patients with STEMI after PCI [60].  
10 Nevertheless, since the two nomograms were obtained in different study populations, the  
11 two nomograms should be compared within the same study.  
12  
13  
14  
15  
16  
17  
18  
19  
20  
21  
22  
23

24 Some study limitations should be mentioned. This study has limitations that are inherent to  
25 retrospective observational studies. The data were obtained retrospectively, which can lead  
26 to less reliable information. As the ischemic time is shortened as much as possible, patients  
27 whose symptoms and/or ECG can be diagnosed are directly treated with PCI. Therefore,  
28 other potential risk factors in our study, such as LVEF before PCI, could not be included  
29 in the analyses. Further studies are still necessary to confirm the performance of the clinical  
30 nomogram in future investigations.  
31  
32  
33  
34  
35  
36  
37  
38  
39

40 In conclusion, a nomogram to predict in-hospital mortality in patients with STEMI after  
41 PCI was developed and validated in Hebei, China. The nomogram showed a satisfactory  
42 performance, with a C-index of 0.948. Thus, this nomogram might be a precisely  
43 individualized predictive tool for prognosis. Still, additional studies are needed to  
44 determine whether it can be applied to other populations before its implementation in  
45 clinical practice.  
46  
47  
48  
49  
50  
51  
52  
53  
54  
55  
56  
57  
58  
59  
60

## **Acknowledgements**

We acknowledge the members of the heart team at the participating centers for their efforts in collecting clinical data and ensuring the accuracy and completeness of the data. We thank the study participants and patient advisers for accepting to be part of the study for working tirelessly to make this work a reality.

## **Funding**

None.

## **Competing Interests**

The authors of this work have nothing to disclose.

## **Ethical standards disclosure**

The study was approved by the Ethics Committees of Hebei General Hospital as the lead center and the ethics committee of each participating hospital (No. 202144). The requirement for informed consent was waived by the committee. The study was conducted according to the tenets of the Declaration of Helsinki for Medical Research Involving Human Subjects and Good Clinical Practice.

## **Authors' contribution**

Yudan Wang, Man Gao and Shihang Zheng carried out the studies, participated in collecting data, and drafted the manuscript. Yudan Wang, Yi Dang and Xiaoyong Qi performed the statistical analysis and participated in its design. Shengqi Jia, Jiaqi Wang

1  
2  
3 and Yingxiao Li helped to draft the manuscript. All authors read and approved the final  
4  
5 manuscript.  
6  
7  
8  
9

### 10 **Data sharing statement**

11  
12 All data generated or analyzed during this study are included in this published article.  
13  
14  
15  
16  
17  
18  
19  
20  
21  
22  
23  
24  
25  
26  
27  
28  
29  
30  
31  
32  
33  
34  
35  
36  
37  
38  
39  
40  
41  
42  
43  
44  
45  
46  
47  
48  
49  
50  
51  
52  
53  
54  
55  
56  
57  
58  
59  
60

For peer review only

## REFERENCES

1. O'Gara PT, Kushner FG, Ascheim DD, et al. 2013 ACCF/AHA guideline for the management of ST-elevation myocardial infarction: a report of the American College of Cardiology Foundation/American Heart Association Task Force on Practice Guidelines. *Circulation* 2013;127:e362-425.
2. Trost JC, Lange RA. Treatment of acute coronary syndrome: part 2: ST-segment elevation myocardial infarction. *Crit Care Med* 2012;40:1939-45.
3. Vogel B, Claessen BE, Arnold SV, et al. ST-segment elevation myocardial infarction. *Nature reviews Disease primers* 2019;5:39.
4. Authors/Task Force M, Piepoli MF, Hoes AW, et al. 2016 European Guidelines on cardiovascular disease prevention in clinical practice: The Sixth Joint Task Force of the European Society of Cardiology and Other Societies on Cardiovascular Disease Prevention in Clinical Practice (constituted by representatives of 10 societies and by invited experts): Developed with the special contribution of the European Association for Cardiovascular Prevention & Rehabilitation (EACPR). *Eur J Prev Cardiol* 2016;23:NP1-NP96.
5. Jayaraj JC, Davatyan K, Subramanian SS, et al. Epidemiology of Myocardial Infarction. In: Pamkucu B, editor. Myocardial Infarction. London: IntechOpen; 2018.
6. Ibanez B, James S, Agewall S, et al. 2017 ESC Guidelines for the management of acute myocardial infarction in patients presenting with ST-segment elevation: The Task Force for the management of acute myocardial infarction in patients presenting with ST-segment elevation of the European Society of Cardiology (ESC). *Eur Heart J* 2018;39:119-77.

- 1  
2  
3 7. O'Gara PT, Kushner FG, Ascheim DD, et al. 2013 ACCF/AHA guideline for the  
4 management of ST-elevation myocardial infarction: a report of the American College  
5 of Cardiology Foundation/American Heart Association Task Force on Practice  
6 Guidelines. *J Am Coll Cardiol* 2013;61:e78-e140.  
7
- 8 8. Li J, Li X, Wang Q, et al. ST-segment elevation myocardial infarction in China from  
9 2001 to 2011 (the China PEACE-Retrospective Acute Myocardial Infarction Study):  
10 a retrospective analysis of hospital data. *Lancet* 2015;385:441-51.  
11
- 12 9. Canto JG, Kiefe CI, Rogers WJ, et al. Number of coronary heart disease risk factors  
13 and mortality in patients with first myocardial infarction. *JAMA* 2011;306:2120-7.  
14
- 15 10. Cenko E, Yoon J, Kedev S, et al. Sex Differences in Outcomes After STEMI: Effect  
16 Modification by Treatment Strategy and Age. *JAMA Intern Med* 2018;178:632-9.  
17
- 18 11. Mehta SR, Wood DA, Storey RF, et al. Complete Revascularization with Multivessel  
19 PCI for Myocardial Infarction. *N Engl J Med* 2019;381:1411-21.  
20
- 21 12. Scholz KH, Maier SKG, Maier LS, et al. Impact of treatment delay on mortality in  
22 ST-segment elevation myocardial infarction (STEMI) patients presenting with and  
23 without haemodynamic instability: results from the German prospective, multicentre  
24 FITT-STEMI trial. *Eur Heart J* 2018;39:1065-74.  
25
- 26 13. Levine GN, Bates ER, Bittl JA, et al. 2016 ACC/AHA Guideline Focused Update on  
27 Duration of Dual Antiplatelet Therapy in Patients With Coronary Artery Disease: A  
28 Report of the American College of Cardiology/American Heart Association Task  
29 Force on Clinical Practice Guidelines: An Update of the 2011 ACCF/AHA/SCAI  
30 Guideline for Percutaneous Coronary Intervention, 2011 ACCF/AHA Guideline for  
31 Coronary Artery Bypass Graft Surgery, 2012  
32  
33  
34  
35  
36  
37  
38  
39  
40  
41  
42  
43  
44  
45  
46  
47  
48  
49  
50  
51  
52  
53  
54  
55  
56

1  
2  
3 ACC/AHA/ACP/AATS/PCNA/SCAI/STS Guideline for the Diagnosis and  
4 Management of Patients With Stable Ischemic Heart Disease, 2013 ACCF/AHA  
5 Guideline for the Management of ST-Elevation Myocardial Infarction, 2014  
6 AHA/ACC Guideline for the Management of Patients With Non-ST-Elevation Acute  
7 Coronary Syndromes, and 2014 ACC/AHA Guideline on Perioperative  
8 Cardiovascular Evaluation and Management of Patients Undergoing Noncardiac  
9 Surgery. *Circulation* 2016;134:e123-55.

- 10  
11  
12  
13  
14  
15  
16  
17  
18  
19 14. Ottani F, Galvani M, Nicolini FA, et al. Elevated cardiac troponin levels predict the  
20 risk of adverse outcome in patients with acute coronary syndromes. *Am Heart J*  
21 2000;140:917-27.  
22  
23  
24  
25  
26 15. Sun T, Wang L, Zhang Y. Prognostic value of B-type natriuretic peptide in patients  
27 with acute coronary syndromes. *Arch Med Res* 2006;37:502-5.  
28  
29  
30  
31 16. Jaberg L, Toggweiler S, Puck M, et al. Prognostic value of N-terminal pro-B-type  
32 natriuretic peptide in patients with acute coronary syndromes undergoing left main  
33 percutaneous coronary intervention. *Circ J* 2011;75:2648-53.  
34  
35  
36  
37  
38 17. Yu T, Jiao Y, Song J, et al. Hospital mortality in acute coronary syndrome: adjustment  
39 of GRACE score by D-dimer enables a more accurate prediction in a prospective  
40 cohort study. *BMC Cardiovasc Disord* 2019;19:252.  
41  
42  
43  
44  
45 18. Forman DE, Chen AY, Wiviott SD, et al. Comparison of outcomes in patients aged  
46 <75, 75 to 84, and  $\geq$  85 years with ST-elevation myocardial infarction (from the  
47 ACTION Registry-GWTG). *Am J Cardiol* 2010;106:1382-8.  
48  
49  
50  
51 19. Rathod KS, Jones DA, Gallagher S, et al. Atypical risk factor profile and excellent  
52 long-term outcomes of young patients treated with primary percutaneous coronary  
53  
54  
55  
56  
57  
58  
59  
60

- 1  
2  
3 intervention for ST-elevation myocardial infarction. *Eur Heart J Acute Cardiovasc*  
4 *Care* 2016;5:23-32.
- 5  
6  
7  
8 20. Haller PM, Jäger B, Farhan S, et al. Impact of age on short- and long-term mortality  
9 of patients with ST-elevation myocardial infarction in the VIENNA STEMI network.  
10 *Wien Klin Wochenschr* 2018;130:172-81.
- 11  
12  
13  
14  
15 21. Payvar S, Kim S, Rao SV, et al. In-hospital outcomes of percutaneous coronary  
16 interventions in extremely obese and normal-weight patients: findings from the  
17 NCDR (National Cardiovascular Data Registry). *J Am Coll Cardiol* 2013;62:692-6.
- 18  
19  
20  
21  
22 22. Planer D, Witzenbichler B, Guagliumi G, et al. Impact of hyperglycemia in patients  
23 with ST-segment elevation myocardial infarction undergoing percutaneous coronary  
24 intervention: the HORIZONS-AMI trial. *Int J Cardiol* 2013;167:2572-9.
- 25  
26  
27  
28  
29 23. Samanta R, Narayan A, Kovoor P, et al. Influence of BMI on Short and Long-Term  
30 Outcomes in Patients With STEMI and LV Dysfunction. *Heart Lung Circ*  
31 2020;29:361-7.
- 32  
33  
34  
35  
36 24. Medina HM, Cannon CP, Fonarow GC, et al. Reperfusion strategies and quality of  
37 care in 5339 patients age 80 years or older presenting with ST-elevation myocardial  
38 infarction: analysis from get with the guidelines-coronary artery disease. *Clin Cardiol*  
39 2012;35:632-40.
- 40  
41  
42  
43  
44  
45 25. Lavie CJ, De Schutter A, Milani RV. Healthy obese versus unhealthy lean: the obesity  
46 paradox. *Nat Rev Endocrinol* 2015;11:55-62.
- 47  
48  
49  
50  
51 26. Winzap P, Davies A, Klingenberg R, et al. Diabetes and baseline glucose are  
52 associated with inflammation, left ventricular function and short- and long-term  
53 outcome in acute coronary syndromes: role of the novel biomarker Cyr 61.
- 54  
55  
56  
57  
58  
59  
60



- 1  
2  
3 *Cardiovasc Diabetol* 2019;18:142.  
4  
5  
6 27. Samanta R, Pouliopoulos J, Kumar S, et al. Influence of BMI on inducible ventricular  
7  
8 tachycardia and mortality in patients with myocardial infarction and left ventricular  
9  
10 dysfunction: The obesity paradox. *Int J Cardiol* 2018;265:148-54.  
11  
12 28. Lavie CJ, Milani RV, Ventura HO. Obesity and cardiovascular disease: risk factor,  
13  
14 paradox, and impact of weight loss. *J Am Coll Cardiol* 2009;53:1925-32.  
15  
16 29. Fukuoka S, Kurita T, Dohi K, et al. Untangling the obesity paradox in patients with  
17  
18 acute myocardial infarction after primary percutaneous coronary intervention (detail  
19  
20 analysis by age). *Int J Cardiol* 2019;289:12-8.  
21  
22  
23 30. Ayça B, Akin F, Celik O, et al. Neutrophil to Lymphocyte Ratio is Related to Stent  
24  
25 Thrombosis and High Mortality in Patients With Acute Myocardial Infarction.  
26  
27 *Angiology* 2015;66:545-52.  
28  
29  
30 31. Machado GP, Araujo GN, Carpes CK, et al. Comparison of neutrophil-to-lymphocyte  
31  
32 ratio and mean platelet volume in the prediction of adverse events after primary  
33  
34 percutaneous coronary intervention in patients with ST-elevation myocardial  
35  
36 infarction. *Atherosclerosis* 2018;274:212-7.  
37  
38  
39 32. Arbel Y, Shacham Y, Ziv-Baran T, et al. Higher neutrophil/lymphocyte ratio is related  
40  
41 to lower ejection fraction and higher long-term all-cause mortality in ST-elevation  
42  
43 myocardial infarction patients. *Can J Cardiol* 2014;30:1177-82.  
44  
45  
46 33. Pan W, Zhao D, Zhang C, et al. Application of neutrophil/lymphocyte ratio in  
47  
48 predicting coronary blood flow and mortality in patients with ST-elevation myocardial  
49  
50 infarction undergoing percutaneous coronary intervention. *J Cardiol* 2015;66:9-14.  
51  
52  
53 34. Sen N, Afsar B, Ozcan F, et al. The neutrophil to lymphocyte ratio was associated  
54  
55  
56  
57  
58  
59  
60

with impaired myocardial perfusion and long term adverse outcome in patients with ST-elevated myocardial infarction undergoing primary coronary intervention. *Atherosclerosis* 2013;228:203-10.

35. Kaya MG, Akpek M, Lam YY, et al. Prognostic value of neutrophil/lymphocyte ratio in patients with ST-elevated myocardial infarction undergoing primary coronary intervention: a prospective, multicenter study. *Int J Cardiol* 2013;168:1154-9.
36. Kirtane AJ, Bui A, Murphy SA, et al. Association of peripheral neutrophilia with adverse angiographic outcomes in ST-elevation myocardial infarction. *Am J Cardiol* 2004;93:532-6.
37. Sheridan FM, Cole PG, Ramage D. Leukocyte adhesion to the coronary microvasculature during ischemia and reperfusion in an in vivo canine model. *Circulation* 1996;93:1784-7.
38. Dandona P, Chaudhuri A, Ghanim H, et al. Insulin as an anti-inflammatory and antiatherogenic modulator. *J Am Coll Cardiol* 2009;53:S14-20.
39. Devos P, Chioléro R, Van den Berghe G, et al. Glucose, insulin and myocardial ischaemia. *Curr Opin Clin Nutr Metab Care* 2006;9:131-9.
40. Young LH, Renfu Y, Russell R, et al. Low-flow ischemia leads to translocation of canine heart GLUT-4 and GLUT-1 glucose transporters to the sarcolemma in vivo. *Circulation* 1997;95:415-22.
41. Khani S, Tayek JA. Cortisol increases gluconeogenesis in humans: its role in the metabolic syndrome. *Clin Sci (Lond)* 2001;101:739-47.
42. Timmer JR, van der Horst IC, Ottervanger JP, et al. Prognostic value of admission glucose in non-diabetic patients with myocardial infarction. *Am Heart J*

- 2004;148:399-404.
43. Buchanan TA, Xiang AH, Peters RK, et al. Preservation of pancreatic beta-cell function and prevention of type 2 diabetes by pharmacological treatment of insulin resistance in high-risk hispanic women. *Diabetes* 2002;51:2796-803.
  44. Marfella R, Sasso FC, Siniscalchi M, et al. Peri-procedural tight glycemic control during early percutaneous coronary intervention is associated with a lower rate of in-stent restenosis in patients with acute ST-elevation myocardial infarction. *J Clin Endocrinol Metab* 2012;97:2862-71.
  45. Shacham Y, Leshem-Rubinow E, Ben-Assa E, et al. Lower admission hemoglobin levels are associated with longer symptom duration in acute ST-elevation myocardial infarction. *Clin Cardiol* 2014;37:73-7.
  46. Keel SB, Abkowitz JL. The microcytic red cell and the anemia of inflammation. *N Engl J Med* 2009;361:1904-6.
  47. Brener SJ, Mehran R, Lansky AJ, et al. Pretreatment with aspirin in acute coronary syndromes: Lessons from the ACUITY and HORIZONS-AMI trials. *Eur Heart J Acute Cardiovasc Care* 2016;5:449-54.
  48. Weidmann L, Obeid S, Mach F, et al. Pre-existing treatment with aspirin or statins influences clinical presentation, infarct size and inflammation in patients with de novo acute coronary syndromes. *Int J Cardiol* 2019;275:171-8.
  49. Yonetsu T, Lee T, Murai T, et al. Association Between Prior Aspirin Use and Morphological Features of Culprit Lesions at First Presentation of Acute Coronary Syndrome Assessed by Optical Coherence Tomography. *Circ J* 2017;81:511-9.
  50. Lancaster GI, Lancaster CJ, Radley D, et al. Prior aspirin use in unstable angina

- predisposes to higher risk: the aspirin paradox. *Int J Cardiol* 2001;80:201-7.
51. Lancaster GI, Jain H, Zarich SW. The role of aspirin resistance in the treatment of acute coronary syndromes. *Clin Cardiol* 2008;31:11-7.
52. Claessen BE, Smits PC, Kereiakes DJ, et al. Impact of lesion length and vessel size on clinical outcomes after percutaneous coronary intervention with everolimus-versus paclitaxel-eluting stents pooled analysis from the SPIRIT (Clinical Evaluation of the XIENCE V Everolimus Eluting Coronary Stent System) and COMPARE (Second-generation everolimus-eluting and paclitaxel-eluting stents in real-life practice) Randomized Trials. *JACC Cardiovasc Interv* 2011;4:1209-15.
53. Kastrati A, Elezi S, Dirschinger J, et al. Influence of lesion length on restenosis after coronary stent placement. *Am J Cardiol* 1999;83:1617-22.
54. Choi IJ, Koh YS, Lim S, et al. Impact of the stent length on long-term clinical outcomes following newer-generation drug-eluting stent implantation. *Am J Cardiol* 2014;113:457-64.
55. Leclerc G, Isner JM, Kearney M, et al. Evidence implicating nonmuscle myosin in restenosis. Use of in situ hybridization to analyze human vascular lesions obtained by directional atherectomy. *Circulation* 1992;85:543-53.
56. Brodie BR, Stuckey TD, Hansen C, et al. Benefit of coronary reperfusion before intervention on outcomes after primary angioplasty for acute myocardial infarction. *Am J Cardiol* 2000;85:13-8.
57. De Luca G, Ernst N, Zijlstra F, et al. Preprocedural TIMI flow and mortality in patients with acute myocardial infarction treated by primary angioplasty. *J Am Coll Cardiol* 2004;43:1363-7.

- 1  
2  
3 58. Lee KL, Woodlief LH, Topol EJ, et al. Predictors of 30-day mortality in the era of  
4 reperfusion for acute myocardial infarction. Results from an international trial of  
5 41,021 patients. GUSTO-I Investigators. *Circulation* 1995;91:1659-68.  
6  
7  
8  
9  
10 59. Shariat SF, Karakiewicz PI, Godoy G, et al. Use of nomograms for predictions of  
11 outcome in patients with advanced bladder cancer. *Ther Adv Urol* 2009;1:13-26.  
12  
13  
14 60. Gao N, Qi X, Dang Y, et al. Establishment and validation of a risk model for  
15 prediction of in-hospital mortality in patients with acute ST-elevation myocardial  
16 infarction after primary PCI. *BMC Cardiovasc Disord* 2020;20:513.  
17  
18  
19  
20  
21  
22  
23  
24  
25  
26  
27  
28  
29  
30  
31  
32  
33  
34  
35  
36  
37  
38  
39  
40  
41  
42  
43  
44  
45  
46  
47  
48  
49  
50  
51  
52  
53  
54  
55  
56  
57  
58  
59  
60

**Table 1 Clinical characteristics of the patients used to construct the nomogram**

| Variables                                           | Training set      |                               |        | Testing set      |                              |        |
|-----------------------------------------------------|-------------------|-------------------------------|--------|------------------|------------------------------|--------|
|                                                     | Survival (n=264)  | In-hospital mortality (n=132) | P      | Survival (n=368) | In-hospital mortality (n=91) | P      |
| Age (years) (mean ±SD)                              | 60.3±12.9         | 69.3±9.8                      | <0.001 | 59.8±12.4        | 74.4±9.6                     | 0.249  |
| Male (n (%))                                        | 202 (76.5)        | 82 (62.1)                     | 0.004  | 294 (79.9)       | 58 (63.7)                    | 0.001  |
| BMI (kg/m <sup>2</sup> )                            | 26.0 (25.4, 26.0) | 24.9 (24.9, 24.9)             | <0.001 | 25.5±3.0         | 25.3 (23.4, 27.5)            | 0.953  |
| Cardiac arrest (n (%))                              | 6 (2.3)           | 4 (3.0)                       | 0.910  | 6 (1.6)          | 2 (2.2)                      | 0.711  |
| Cardiogenic shock before admission (n (%))          | 6 (2.3)           | 28 (21.2)                     | <0.001 | 15 (4.1)         | 15 (16.5)                    | <0.001 |
| Use of temporary pacemaker before admission (n (%)) | 0                 | 3 (2.3)                       | 0.065  | 2 (0.5)          | 2 (2.2)                      | 0.128  |
| Ventilator support before admission (n (%))         | 1 (0.4)           | 5 (3.8)                       | 0.029  | 2 (0.5)          | 5 (5.5)                      | 0.001  |
| CPR before admission (n (%))                        | 5 (1.9)           | 7 (5.3)                       | 0.12   | 0                | 5 (5.5)                      | <0.001 |

|                                           |                     |                      |        |                      |                      |        |
|-------------------------------------------|---------------------|----------------------|--------|----------------------|----------------------|--------|
| SBP on admission (median (IQR))           | 133 (114, 149)      | 118 (100, 140)       | <0.001 | 129±25               | 121 (107, 135)       | 0.003  |
| DBP on admission (median (IQR))           | 82 (72, 92)         | 73 (62, 82)          | <0.001 | 80±15                | 76±16                | 0.011  |
| Heart rate on admission (median (IQR))    | 76 (64, 89)         | 80 (66, 96)          | 0.025  | 78±17                | 79±18                | 0.613  |
| Fatal arrhythmia before admission (n (%)) | 15 (5.7)            | 6 (4.5)              | 0.812  | 12 (3.3)             | 8 (8.8)              | 0.021  |
| Total ischemic time (min (median (IQR)))  | 153.5 (95.3, 249.5) | 360.0 (193.8, 420.0) | <0.001 | 190.0 (126.5, 282.8) | 218.0 (125.3, 374.8) | 0.042  |
| Killip class 3-4 (n (%))                  | 95 (36.0)           | 37 (28.0)            | 0.142  | 66 (17.9)            | 53 (58.2)            | <0.001 |
| Past medical history                      |                     |                      |        |                      |                      |        |
| Hypertension (n (%))                      | 137 (51.9)          | 74 (56.1)            | 0.499  | 38 (10.3)            | 35 (38.5)            | <0.001 |
| DM (n (%))                                | 49 (18.6)           | 47 (35.6)            | <0.001 | 84 (22.8)            | 20 (22.0)            | 0.863  |
| Hyperlipidemia (n (%))                    | 12 (4.5)            | 27 (20.5)            | <0.001 | 23 (6.3)             | 18 (19.8)            | <0.001 |

|                                            |           |           |        |           |           |        |
|--------------------------------------------|-----------|-----------|--------|-----------|-----------|--------|
| Previous PCI (n (%))                       | 8 (3.0)   | 10 (7.6)  | 0.073  | 17 (4.6)  | 6 (6.6)   | 0.440  |
| Previous CABG (n (%))                      | 0         | 1 (0.8)   | 0.723  | 0         | 1 (1.1)   | 0.044  |
| CAD (n (%))                                | 17 (6.4)  | 28 (21.2) | <0.001 | 20 (5.4)  | 20 (22.0) | <0.001 |
| AF (n (%))                                 | 1 (0.4)   | 10 (7.6)  | <0.001 | 3 (0.8)   | 10 (11.0) | <0.001 |
| HF (n (%))                                 | 3 (1.1)   | 1 (0.8)   | 0.722  | 18 (4.9)  | 7 (7.7)   | 0.292  |
| Renal insufficiency (n (%))                | 1 (0.4)   | 61 (46.2) | <0.001 | 1 (0.3)   | 12 (13.2) | <0.001 |
| History of cerebrovascular disease (n (%)) | 40 (15.2) | 24 (18.2) | 0.530  | 60 (16.3) | 12 (13.2) | 0.464  |
| Peripheral vascular disease (n (%))        | 5 (1.9)   | 4 (3.0)   | 0.721  | 3 (0.8)   | 2 (2.2)   | 0.255  |
| History of bleeding (n (%))                | 1 (0.4)   | 1 (0.8)   | >0.999 | 6 (1.6)   | 1 (1.1)   | 0.711  |
| Family history of CAD (n (%))              | 28 (10.6) | 16 (11.1) | 0.875  | 62 (16.8) | 6 (6.6)   | 0.014  |
| Angiographic characteristics               |           |           |        |           |           |        |
| Number of stents (median (IQR))            | 1 (1, 1)  | 1 (0, 1)  | <0.001 | 1 (1, 1)  | 1 (1, 1)  | 0.067  |



|                                 |            |           |        |            |           |        |
|---------------------------------|------------|-----------|--------|------------|-----------|--------|
| Long lesions (n (%))            | 178 (67.4) | 67 (50.8) | 0.002  | 131 (35.6) | 63 (69.2) | <0.001 |
| Thrombus aspiration (n (%))     | 92 (34.8)  | 31 (23.5) | 0.029  | 205 (55.7) | 16 (17.6) | <0.001 |
| Residual stenosis (n (%))       | 2 (0.8)    | 10 (7.6)  | 0.001  | 4 (1.1)    | 6 (6.6)   | 0.001  |
| Use temporary pacemaker (n (%)) | 4 (1.5)    | 18 (13.6) | <0.001 | 2 (0.5)    | 7 (7.7)   | <0.001 |
| IABP (n (%))                    | 4 (1.5)    | 15 (11.4) | <0.001 | 4 (1.1)    | 11 (12.1) | <0.001 |
| Respirator support (n (%))      | 1 (0.4)    | 19 (14.4) | <0.001 | 2 (0.5)    | 11 (12.1) | <0.001 |
| Pericardial aspiration (n (%))  | 0          | 3 (2.3)   | 0.065  | 0          | 3 (3.3)   | <0.001 |
| No flow (n (%))                 | 48 (18.2)  | 50 (37.9) | <0.001 | 55 (14.9)  | 29 (31.9) | <0.001 |
| Coronary perforation (n (%))    | 0          | 5 (3.8)   | 0.001  | 1 (0.3)    | 1 (1.1)   | 0.283  |
| Dissection (n (%))              | 0          | 3 (2.3)   | 0.065  | 0          | 5 (5.5)   | <0.001 |
| Pericardial tamponade (n (%))   | 0          | 9 (6.8)   | <0.001 | 0          | 2 (2.2)   | 0.004  |
| Acute HF (n (%))                | 22 (8.3)   | 33 (25.0) | <0.001 | 30 (7.7)   | 22 (24.2) | <0.001 |
| Bleeding (n (%))                | 0          | 2 (1.5)   | 0.210  | 3 (0.8)    | 3 (3.3)   | 0.062  |
| Cardiac arrest (n (%))          | 1 (0.4)    | 23 (17.4) | <0.001 | 6 (1.6)    | 8 (8.8)   | <0.001 |

|                                           |                      |                      |        |                      |                      |        |
|-------------------------------------------|----------------------|----------------------|--------|----------------------|----------------------|--------|
| Recurrent MI (n (%))                      | 1 (0.4)              | 15 (11.4)            | <0.001 | 2 (0.5)              | 5 (5.5)              | 0.001  |
| Stent thrombosis (n (%))                  | 6 (2.3)              | 2 (1.5)              | 0.900  | 13 (3.5)             | 1 (1.1)              | 0.227  |
| Type B2-C (n (%))                         | 213 (80.7)           | 96 (72.7)            | 0.094  | 230 (62.5)           | 47 (51.6)            | 0.058  |
| TIMI flow grade 0-1 before<br>PCI (n (%)) | 197 (74.6)           | 114 (86.4)           | 0.011  | 274 (74.5)           | 65 (71.4)            | 0.556  |
| LAD (n (%))                               | 85 (32.2)            | 64 (48.5)            | 0.002  | 177 (48.1)           | 32 (35.2)            | 0.027  |
| Biochemical markers                       |                      |                      |        |                      |                      |        |
| Hyperkalemia (n (%))                      | 3 (1.1)              | 33 (25.0)            | <0.001 | 11 (3.0)             | 19 (20.9)            | <0.001 |
| Hyponatremia (n (%))                      | 12 (4.5)             | 19 (14.4)            | 0.001  | 31 (8.4)             | 6 (6.6)              | 0.566  |
| Anemia (n (%))                            | 12 (4.5)             | 14 (10.6)            | 0.022  | 21 (5.7)             | 19 (20.9)            | <0.001 |
| N/L ratio (median (IQR))                  | 4.70 (2.68, 7.87)    | 8.54 (3.19, 11.46)   | <0.001 | 5.08 (3.65, 9.46)    | 6.02 (7.95, 8.73)    | 0.107  |
| HCT, % (median (IQR))                     | 41.8 (38.0, 44.6)    | 38.5 (36.8, 41.3)    | <0.001 | 41.1±5.7             | 41.0 (38.2, 44.6)    | 0.790  |
| HGB, g/L (median (IQR))                   | 142.0 (129.0, 155.0) | 129.0 (119.0, 137.3) | <0.001 | 139.5±1.7            | 127.3±1.2            | 0.286  |
| PLT, ×10 <sup>9</sup> /L (median (IQR))   | 224.0 (186.0, 269.0) | 227.0 (194.8, 246.3) | 0.554  | 229.0 (191.0, 274.0) | 224.0 (182.0, 259.3) | 0.301  |

|                                                          |                   |                   |        |                   |                   |        |
|----------------------------------------------------------|-------------------|-------------------|--------|-------------------|-------------------|--------|
| Random blood glucose on admission, mmol/L (median (IQR)) | 5.95 (5.02, 7.44) | 9.81 (8.60, 9.81) | <0.001 | 6.13 (5.05, 9.35) | 6.15 (5.15, 8.07) | 0.668  |
| EF after PCI, % (median (IQR))                           | 54.0 (47.8, 59.0) | 43.0 (38.0, 48.5) | <0.001 | 56 (49, 61)       | 55 (47, 60)       | 0.584  |
| Medication list on admission                             |                   |                   |        |                   |                   |        |
| Aspirin                                                  | 262 (99.2)        | 117 (88.6)        | <0.001 | 332 (90.2)        | 72 (79.1)         | 0.004  |
| Ticagrelor/clopidogrel                                   | 262 (99.2)        | 131 (99.2)        | >0.999 | 332 (90.2)        | 86 (94.5)         | 0.199  |
| ACEI/ARB                                                 | 100 (37.9)        | 33 (25.0)         | 0.014  | 18 (4.9)          | 7 (7.7)           | 0.292  |
| β-Blocker                                                | 66 (25.0)         | 26 (19.7)         | 0.239  | 29 (7.9)          | 8 (8.9)           | 0.753  |
| Statin                                                   | 130 (49.2)        | 58 (43.9)         | 0.319  | 181 (49.2)        | 25 (27.5)         | <0.001 |

BMI: body mass index; SBP: systolic blood pressure; DBP: diastolic blood pressure; DM: diabetes mellitus; PCI: percutaneous coronary intervention; CABG: coronary artery bypass graft; CAD: coronary atherosclerotic heart disease; AF: atrial fibrillation; HF: heart failure; IABP: intra-aortic balloon pump; MI: myocardial infarction; LAD: left anterior descending branch; N/L ratio: neutrophils/lymphocytes ratio; HCT: hematocrit; HGB: hemoglobin; PLT: platelets; EF: ejection fraction; ACEI: angiotensin-converting enzyme inhibitor; ARB: angiotensin receptor blocker.

**Table 2 Variables selected as predictors for the nomogram according to the multivariable logistic analysis**

| Variables                         | P      | OR   | 95% CI |      |
|-----------------------------------|--------|------|--------|------|
|                                   |        |      | Low    | High |
| Age                               | 0.049  | 1.07 | 1.05   | 1.09 |
| BMI                               | 0.019  | 0.55 | 0.31   | 0.87 |
| SBP on admission                  | 0.009  | 0.92 | 0.86   | 0.97 |
| HGB                               | 0.017  | 0.85 | 0.73   | 0.97 |
| Random blood glucose on admission | 0.011  | 1.53 | 1.13   | 2.21 |
| EF after PCI                      | 0.015  | 0.89 | 0.80   | 0.97 |
| Use aspirin before admission      | 0.001  | 0.01 | 0.009  | 0.04 |
| N/L ratio                         | 0.004  | 1.34 | 1.12   | 1.69 |
| Long lesions                      | <0.001 | 2.00 | 1.31   | 3.08 |
| TIMI flow grade 0-1 before PCI    | 0.008  | 2.15 | 1.24   | 3.90 |

OR: odds ratio; CI: confidence interval; BMI: body mass index; SBP: systolic blood pressure; HGB: hemoglobin; EF: ejection fraction; PCI: percutaneous coronary intervention; N/L ratio: neutrophils/lymphocytes ratio; TIMI: thrombolysis in myocardial infarction.

## Figure legends

**Figure 1.** Flowchart illustrating the process of patient selection.

**Figure 2.** The nomogram for the prediction of in-hospital mortality in patients with acute ST-elevation myocardial infarction after primary PCI. BMI: body mass index; SBP: systolic blood pressure; HGB: hemoglobin; EF: ejection fraction; N/L ratio: neutrophils/lymphocytes ratio.

**Figure 3.** The calibration curves of the nomogram for the training set (A) and the testing set (B).

**Figure 4.** The received operating characteristics (ROC) curves of the nomogram for the training set (A) and the testing set (B).

**Figure 5.** The decision curve analysis (DCA) for the risk model for the training set (A) and the testing set (B).

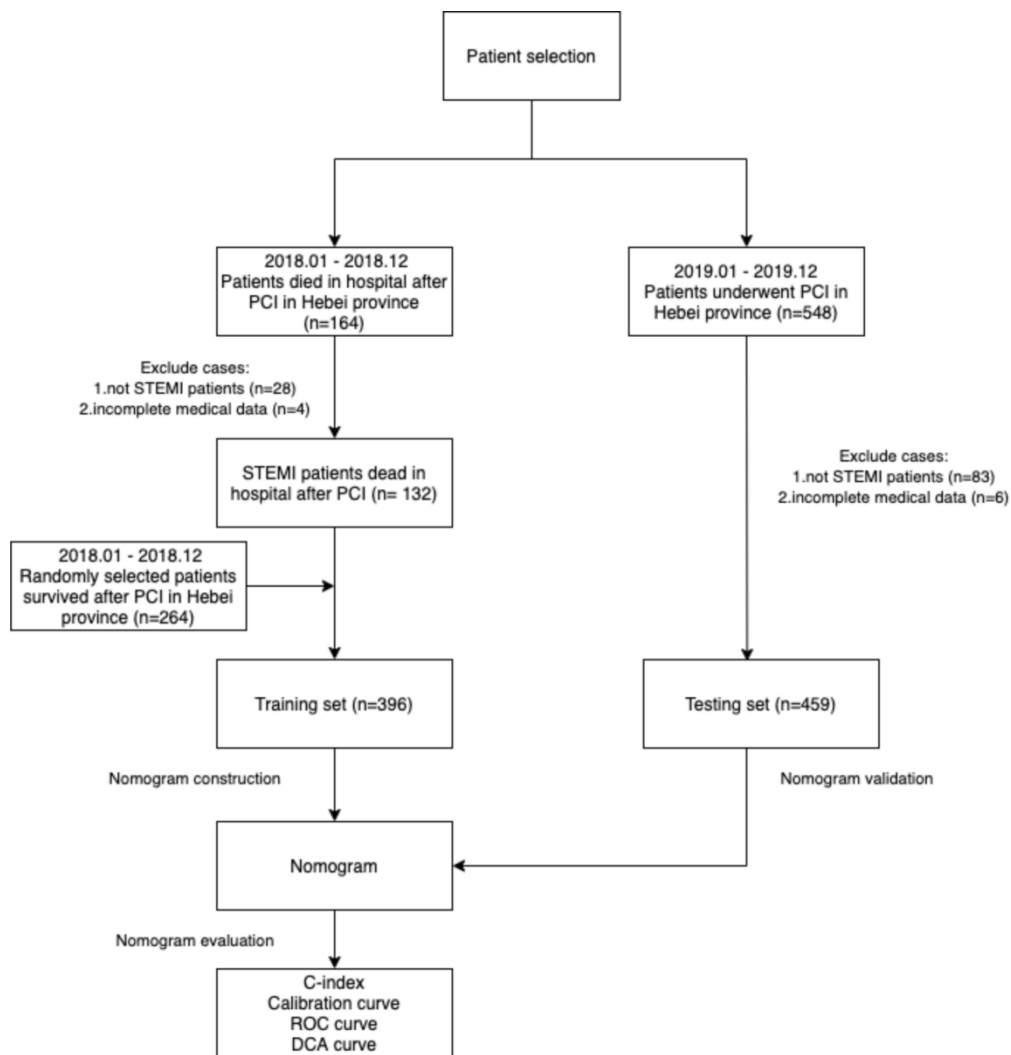

Figure 1. Flowchart illustrating the process of patient selection.

170x177mm (300 x 300 DPI)

1  
2  
3  
4  
5  
6  
7  
8  
9  
10  
11  
12  
13  
14  
15  
16  
17  
18  
19  
20  
21  
22  
23  
24  
25  
26  
27  
28  
29  
30  
31  
32  
33  
34  
35  
36  
37  
38  
39  
40  
41  
42  
43  
44  
45  
46  
47  
48  
49  
50  
51  
52  
53  
54  
55  
56  
57  
58  
59  
60

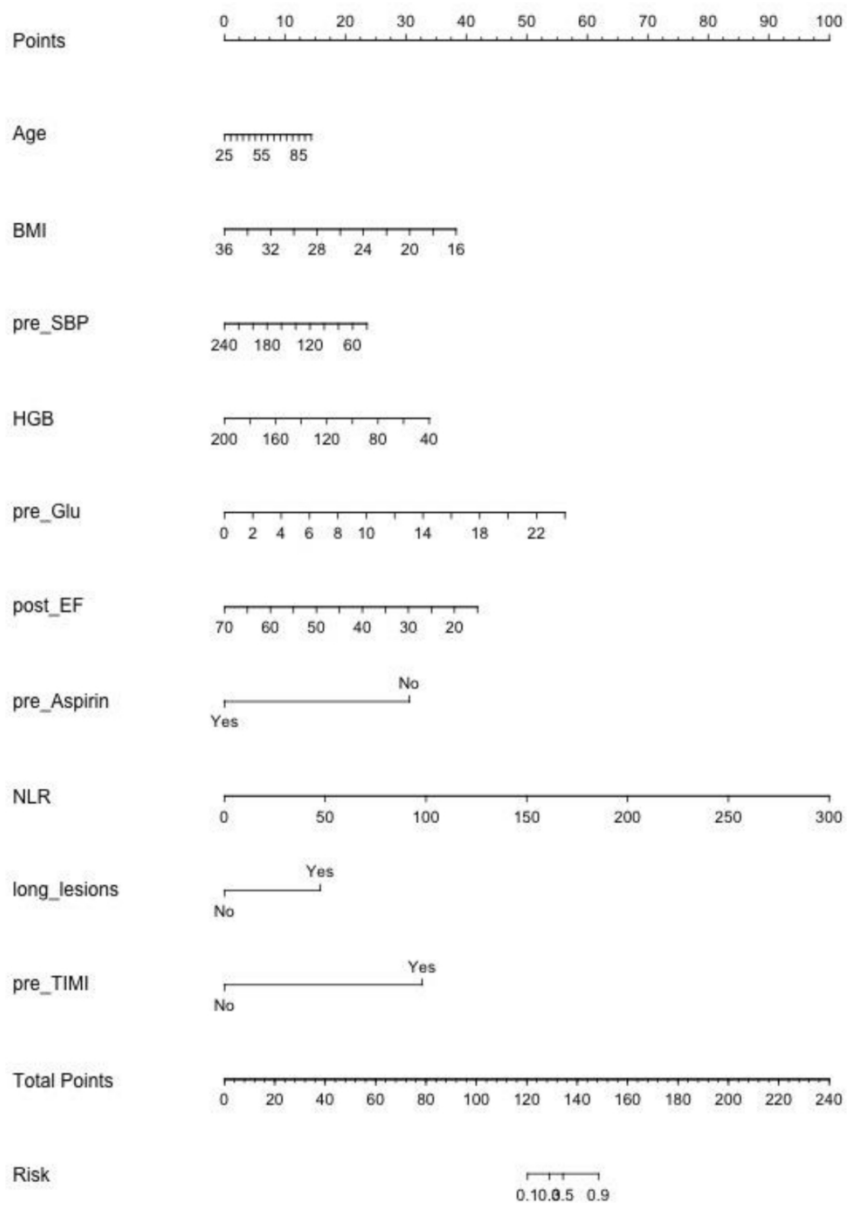

Figure 2. The nomogram for the prediction of in-hospital mortality in patients with acute ST-elevation myocardial infarction after primary PCI. BMI: body mass index; SBP: systolic blood pressure; HGB: hemoglobin; EF: ejection fraction; N/L ratio: neutrophils/lymphocytes ratio.

170x242mm (300 x 300 DPI)

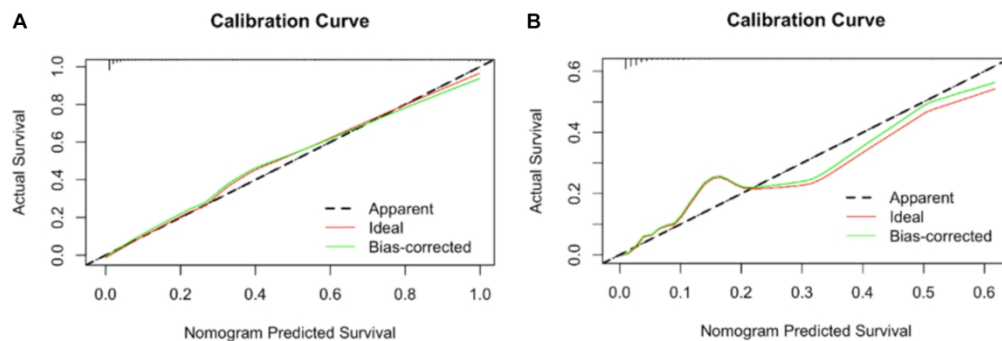

Figure 3. The calibration curves of the nomogram for the training set (A) and the testing set (B).

170x56mm (300 x 300 DPI)



1  
2  
3  
4  
5  
6  
7  
8  
9  
10  
11  
12  
13  
14  
15  
16  
17  
18  
19  
20  
21  
22  
23  
24  
25  
26  
27  
28  
29  
30  
31  
32  
33  
34  
35  
36  
37  
38  
39  
40  
41  
42  
43  
44  
45  
46  
47  
48  
49  
50  
51  
52  
53  
54  
55  
56  
57  
58  
59  
60

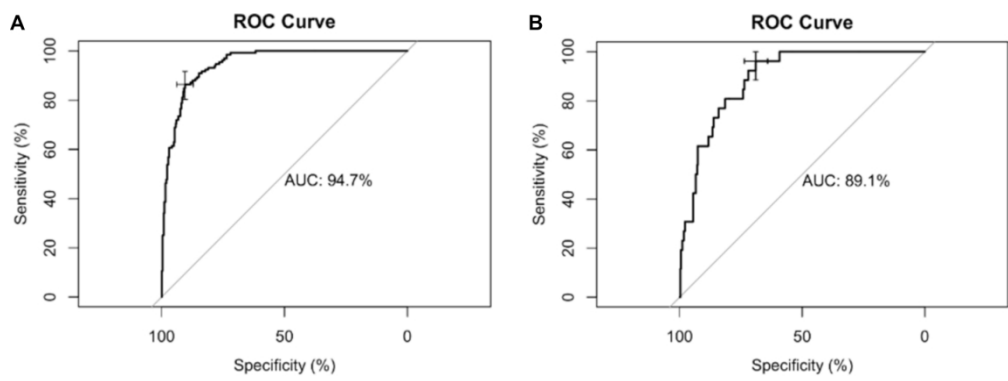

Figure 4. The received operating characteristics (ROC) curves of the nomogram for the training set (A) and the testing set (B).

170x61mm (300 x 300 DPI)

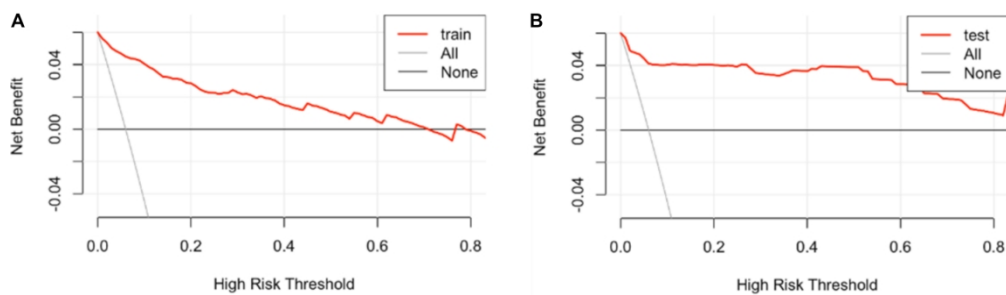

Figure 5. The decision curve analysis (DCA) for the risk model for the training set (A) and the testing set (B).

170x48mm (300 x 300 DPI)

**STROBE 2007 (v4) checklist of items to be included in reports of observational studies in epidemiology\***  
**Checklist for cohort, case-control, and cross-sectional studies (combined)**

| Section/Topic             | Item # | Recommendation                                                                                                                                                                                                                                                                                                                                                                                                                                                         | Reported on page # |
|---------------------------|--------|------------------------------------------------------------------------------------------------------------------------------------------------------------------------------------------------------------------------------------------------------------------------------------------------------------------------------------------------------------------------------------------------------------------------------------------------------------------------|--------------------|
| Title and abstract        | 1      | (a) Indicate the study's design with a commonly used term in the title or the abstract                                                                                                                                                                                                                                                                                                                                                                                 | 1                  |
|                           |        | (b) Provide in the abstract an informative and balanced summary of what was done and what was found                                                                                                                                                                                                                                                                                                                                                                    |                    |
| <b>Introduction</b>       |        |                                                                                                                                                                                                                                                                                                                                                                                                                                                                        |                    |
| Background/rationale      | 2      | Explain the scientific background and rationale for the investigation being reported                                                                                                                                                                                                                                                                                                                                                                                   | 4                  |
| Objectives                | 3      | State specific objectives, including any pre-specified hypotheses                                                                                                                                                                                                                                                                                                                                                                                                      | 5                  |
| <b>Methods</b>            |        |                                                                                                                                                                                                                                                                                                                                                                                                                                                                        |                    |
| Study design              | 4      | Present key elements of study design early in the paper                                                                                                                                                                                                                                                                                                                                                                                                                | 6                  |
| Setting                   | 5      | Describe the setting, locations, and relevant dates, including periods of recruitment, exposure, follow-up, and data collection                                                                                                                                                                                                                                                                                                                                        | 6                  |
| Participants              | 6      | (a) <i>Cohort study</i> —Give the eligibility criteria, and the sources and methods of selection of participants. Describe methods of follow-up<br><i>Case-control study</i> —Give the eligibility criteria, and the sources and methods of case ascertainment and control selection. Give the rationale for the choice of cases and controls<br><i>Cross-sectional study</i> —Give the eligibility criteria, and the sources and methods of selection of participants | 6                  |
|                           |        | (b) <i>Cohort study</i> —For matched studies, give matching criteria and number of exposed and unexposed<br><i>Case-control study</i> —For matched studies, give matching criteria and the number of controls per case                                                                                                                                                                                                                                                 |                    |
| Variables                 | 7      | Clearly define all outcomes, exposures, predictors, potential confounders, and effect modifiers. Give diagnostic criteria, if applicable                                                                                                                                                                                                                                                                                                                               | 6                  |
| Data sources/ measurement | 8*     | For each variable of interest, give sources of data and details of methods of assessment (measurement). Describe comparability of assessment methods if there is more than one group                                                                                                                                                                                                                                                                                   | 7                  |
| Bias                      | 9      | Describe any efforts to address potential sources of bias                                                                                                                                                                                                                                                                                                                                                                                                              | 7                  |
| Study size                | 10     | Explain how the study size was arrived at                                                                                                                                                                                                                                                                                                                                                                                                                              | 7                  |
| Quantitative variables    | 11     | Explain how quantitative variables were handled in the analyses. If applicable, describe which groupings were chosen and why                                                                                                                                                                                                                                                                                                                                           | 7                  |
| Statistical methods       | 12     | (a) Describe all statistical methods, including those used to control for confounding                                                                                                                                                                                                                                                                                                                                                                                  | 7                  |
|                           |        | (b) Describe any methods used to examine subgroups and interactions                                                                                                                                                                                                                                                                                                                                                                                                    |                    |
|                           |        | (c) Explain how missing data were addressed                                                                                                                                                                                                                                                                                                                                                                                                                            |                    |
|                           |        | (d) <i>Cohort study</i> —If applicable, explain how loss to follow-up was addressed<br><i>Case-control study</i> —If applicable, explain how matching of cases and controls was addressed                                                                                                                                                                                                                                                                              |                    |

|                          |     |                                                                                                                                                                                                                                                                                                                                                                                                               |    |
|--------------------------|-----|---------------------------------------------------------------------------------------------------------------------------------------------------------------------------------------------------------------------------------------------------------------------------------------------------------------------------------------------------------------------------------------------------------------|----|
|                          |     | <i>Cross-sectional study</i> —If applicable, describe analytical methods taking account of sampling strategy                                                                                                                                                                                                                                                                                                  |    |
|                          |     | (e) Describe any sensitivity analyses                                                                                                                                                                                                                                                                                                                                                                         |    |
| <b>Results</b>           |     |                                                                                                                                                                                                                                                                                                                                                                                                               |    |
| Participants             | 13* | (a) Report numbers of individuals at each stage of study—eg numbers potentially eligible, examined for eligibility, confirmed eligible, included in the study, completing follow-up, and analysed<br>(b) Give reasons for non-participation at each stage<br>(c) Consider use of a flow diagram                                                                                                               | 9  |
| Descriptive data         | 14* | (a) Give characteristics of study participants (eg demographic, clinical, social) and information on exposures and potential confounders<br>(b) Indicate number of participants with missing data for each variable of interest<br>(c) <i>Cohort study</i> —Summarise follow-up time (eg, average and total amount)                                                                                           | 9  |
| Outcome data             | 15* | <i>Cohort study</i> —Report numbers of outcome events or summary measures over time<br><i>Case-control study</i> —Report numbers in each exposure category, or summary measures of exposure<br><i>Cross-sectional study</i> —Report numbers of outcome events or summary measures                                                                                                                             | 9  |
| Main results             | 16  | (a) Give unadjusted estimates and, if applicable, confounder-adjusted estimates and their precision (eg, 95% confidence interval). Make clear which confounders were adjusted for and why they were included<br>(b) Report category boundaries when continuous variables were categorized<br>(c) If relevant, consider translating estimates of relative risk into absolute risk for a meaningful time period | 9  |
| Other analyses           | 17  | Report other analyses done—eg analyses of subgroups and interactions, and sensitivity analyses                                                                                                                                                                                                                                                                                                                | 10 |
| <b>Discussion</b>        |     |                                                                                                                                                                                                                                                                                                                                                                                                               |    |
| Key results              | 18  | Summarise key results with reference to study objectives                                                                                                                                                                                                                                                                                                                                                      | 11 |
| Limitations              | 19  | Discuss limitations of the study, taking into account sources of potential bias or imprecision. Discuss both direction and magnitude of any potential bias                                                                                                                                                                                                                                                    | 15 |
| Interpretation           | 20  | Give a cautious overall interpretation of results considering objectives, limitations, multiplicity of analyses, results from similar studies, and other relevant evidence                                                                                                                                                                                                                                    | 15 |
| Generalisability         | 21  | Discuss the generalisability (external validity) of the study results                                                                                                                                                                                                                                                                                                                                         | 15 |
| <b>Other information</b> |     |                                                                                                                                                                                                                                                                                                                                                                                                               |    |
| Funding                  | 22  | Give the source of funding and the role of the funders for the present study and, if applicable, for the original study on which the present article is based                                                                                                                                                                                                                                                 | 16 |

\*Give information separately for cases and controls in case-control studies and, if applicable, for exposed and unexposed groups in cohort and cross-sectional studies.

**Note:** An Explanation and Elaboration article discusses each checklist item and gives methodological background and published examples of transparent reporting. The STROBE checklist is best used in conjunction with this article (freely available on the Web sites of PLoS Medicine at <http://www.plosmedicine.org/>, Annals of Internal Medicine at <http://www.annals.org/>, and Epidemiology at <http://www.epidem.com/>). Information on the STROBE Initiative is available at [www.strobe-statement.org](http://www.strobe-statement.org).

# BMJ Open

**A nomogram for the prediction of in-hospital mortality in patients with acute ST-elevation myocardial infarction after primary percutaneous coronary intervention: a multicentre, retrospective, observation study in Hebei Province, China**

|                                 |                                                                                                                                                                                                                                                                                                                                                                                                                                                                                                                                                                                                                                                                                                                    |
|---------------------------------|--------------------------------------------------------------------------------------------------------------------------------------------------------------------------------------------------------------------------------------------------------------------------------------------------------------------------------------------------------------------------------------------------------------------------------------------------------------------------------------------------------------------------------------------------------------------------------------------------------------------------------------------------------------------------------------------------------------------|
| Journal:                        | <i>BMJ Open</i>                                                                                                                                                                                                                                                                                                                                                                                                                                                                                                                                                                                                                                                                                                    |
| Manuscript ID                   | bmjopen-2021-056101.R1                                                                                                                                                                                                                                                                                                                                                                                                                                                                                                                                                                                                                                                                                             |
| Article Type:                   | Original research                                                                                                                                                                                                                                                                                                                                                                                                                                                                                                                                                                                                                                                                                                  |
| Date Submitted by the Author:   | 30-Dec-2021                                                                                                                                                                                                                                                                                                                                                                                                                                                                                                                                                                                                                                                                                                        |
| Complete List of Authors:       | Wang, Yudan; Hebei Medical University, School of Graduate; Hebei General Hospital, Department of Cardiology Center<br>Wang, Wenjing; Hebei General Hospital, Department of Cardiology Center<br>Jia, Shengqi; Hebei Medical University, School of Graduate<br>Gao, Man; Hebei Medical University, School of Graduate<br>Zheng, Shihang; Hebei North University, School of Graduate<br>Wang, Jiaqi; Hebei North University, School of Graduate<br>Dang, Yi; Hebei General Hospital, Department of Cardiology Center<br>Li, Yingxiao; Hebei General Hospital, Department of Cardiology Center<br>Qi, Xiaoyong; Hebei Medical University, School of Graduate; Hebei General Hospital, Department of Cardiology Center |
| <b>Primary Subject Heading</b>: | Cardiovascular medicine                                                                                                                                                                                                                                                                                                                                                                                                                                                                                                                                                                                                                                                                                            |
| Secondary Subject Heading:      | Cardiovascular medicine                                                                                                                                                                                                                                                                                                                                                                                                                                                                                                                                                                                                                                                                                            |
| Keywords:                       | Coronary intervention < CARDIOLOGY, Coronary heart disease < CARDIOLOGY, Myocardial infarction < CARDIOLOGY                                                                                                                                                                                                                                                                                                                                                                                                                                                                                                                                                                                                        |
|                                 |                                                                                                                                                                                                                                                                                                                                                                                                                                                                                                                                                                                                                                                                                                                    |

SCHOLARONE™  
Manuscripts



I, the Submitting Author has the right to grant and does grant on behalf of all authors of the Work (as defined in the below author licence), an exclusive licence and/or a non-exclusive licence for contributions from authors who are: i) UK Crown employees; ii) where BMJ has agreed a CC-BY licence shall apply, and/or iii) in accordance with the terms applicable for US Federal Government officers or employees acting as part of their official duties; on a worldwide, perpetual, irrevocable, royalty-free basis to BMJ Publishing Group Ltd ("BMJ") its licensees and where the relevant Journal is co-owned by BMJ to the co-owners of the Journal, to publish the Work in this journal and any other BMJ products and to exploit all rights, as set out in our [licence](#).

The Submitting Author accepts and understands that any supply made under these terms is made by BMJ to the Submitting Author unless you are acting as an employee on behalf of your employer or a postgraduate student of an affiliated institution which is paying any applicable article publishing charge ("APC") for Open Access articles. Where the Submitting Author wishes to make the Work available on an Open Access basis (and intends to pay the relevant APC), the terms of reuse of such Open Access shall be governed by a Creative Commons licence – details of these licences and which [Creative Commons](#) licence will apply to this Work are set out in our licence referred to above.

Other than as permitted in any relevant BMJ Author's Self Archiving Policies, I confirm this Work has not been accepted for publication elsewhere, is not being considered for publication elsewhere and does not duplicate material already published. I confirm all authors consent to publication of this Work and authorise the granting of this licence.

1  
2  
3 1 **A nomogram for the prediction of in-hospital mortality in patients with acute ST-**  
4  
5 **elevation myocardial infarction after primary percutaneous coronary intervention: a**  
6  
7 **multicentre, retrospective, observation study in Hebei Province, China**  
8  
9

10 4  
11  
12 5 **Running title:** Nomogram for STEMI in-hospital mortality after PCI  
13  
14  
15 6

16  
17 7 **Yudan Wang<sup>1,2</sup>, Wenjing Wang<sup>2</sup>, Shengqi Jia<sup>1</sup>, Man Gao<sup>1</sup>, Shihang Zheng<sup>3</sup>, Jiaqi**  
18  
19 8 **Wang<sup>3</sup>, Yi Dang<sup>2</sup>, Yingxiao Li<sup>2</sup>, Xiaoyong Qi<sup>1,2\*</sup>**  
20

21  
22 9 <sup>1</sup>School of Graduate, Hebei Medical University, Shijiazhuang, Hebei Province, People's  
23  
24 10 Republic of China

25  
26 11 <sup>2</sup>Department of Cardiology Center, Hebei General Hospital, Shijiazhuang, Hebei Province,  
27  
28 12 People's Republic of China

29  
30 13 <sup>3</sup>School of Graduate, Hebei North University, Zhangjiakou, Hebei Province, People's  
31  
32 14 Republic of China

33  
34  
35 15  
36  
37 16 **\*Corresponding Author**

38  
39 17 Xiaoyong Qi

40  
41  
42 18 School of Graduate, Hebei Medical University, Shijiazhuang, Hebei Province, People's  
43  
44 19 Republic of China

45  
46 20 Department of Cardiology Center, Hebei General Hospital, No. 348, Heping West Road,  
47  
48 21 Shijiazhuang 050051, Hebei Province, People's Republic of China

49  
50  
51 22 E-mail address: hbghqxy@126.com

52  
53  
54 23 **Word count:** 3020  
55

1  
2  
3 1 **ABSTRACT**  
4

5 2 **Objectives:** To establish a clinical prognostic nomogram for predicting in-hospital  
6 mortality after primary percutaneous coronary intervention (PCI) among patients with ST-  
7 elevation myocardial infarction (STEMI).  
8  
9

10 4  
11  
12 5 **Design:** Retrospective, multicenter, observational study.  
13

14 6 **Setting:** Thirty-nine hospitals in Hebei Province.  
15

16 7 **Participants:** Patients with STEMI who underwent PCI from January 2018 to December  
17 2019.  
18  
19

20 8  
21 9 **Interventions:** A multivariable logistic regression model was used to identify the factors  
22 associated with in-hospital mortality. Then, they were incorporated into a nomogram. The  
23 performance of the nomogram was evaluated by the discrimination, calibration, and  
24 clinical usefulness.  
25  
26  
27  
28  
29

30 10  
31 11 **Primary and secondary outcome measures:** The outcome was the factors associated with  
32 in-hospital mortality.  
33  
34

35 12  
36 13 **Results:** This study included 855 patients, among whom 223 died in hospital. Age, Body  
37 Mass Index (BMI), systolic pressure on admission, hemoglobin, random blood glucose on  
38 admission, ejection fraction after PCI, use aspirin before admission, long lesions,  
39 thrombolysis in myocardial infarction (TIMI) flow grade, and neutrophils/lymphocytes  
40 ratio (N/L ratio) were independently associated with in-hospital mortality (all  $P < 0.05$ ). In  
41 the training set, the nomogram showed a C-index of 0.947, goodness-of-fit of 0.683, and  
42 area under the receiver operating characteristic curve (AUC) of 0.947 (95%CI=0.927-  
43 0.967). In the testing set, the C-index was 0.891, goodness-of-fit was 0.462, and AUC was  
44 0.891 (95%CI=0.844-0.939). The results indicate that the nomogram had good  
45  
46  
47  
48  
49  
50  
51  
52  
53  
54  
55  
56  
57  
58  
59  
60



1 discrimination and good prediction accuracy and could achieve a good net benefit.

2 **Conclusions:** A nomogram to predict in-hospital mortality in patients with STEMI after  
3 PCI was developed and validated in Hebei, China and showed a satisfactory performance

4  
5 **Keywords:** nomogram; ST-elevated myocardial infarction; percutaneous coronary  
6 intervention; in-hospital mortality

7  
8 **Strengths and limitations of this study**

- 9 - This is a multi-center study, included 39 tertiary centers and 855 patients, including  
10 more patients (223, 26.1%) who died in the hospital.  
11 - The data were obtained retrospectively and some patients died during the PCI, which  
12 can lead to some missing information.  
13 - Further prospective studies are still necessary to confirm the performance of the  
14 clinical applicability in future investigations and verify the practicality in ICU.

## 1 INTRODUCTION

2 ST-segment elevation myocardial infarction (STEMI), a type of coronary artery disease  
3 (CAD), is a common clinical emergency and critical illness <sup>1</sup>. STEMI is most often caused  
4 by plaque rupture of an atherosclerotic lesion in the affected (culprit) coronary artery  
5 followed by total occlusion of the vessel lumen with a thrombus <sup>2,3</sup>. Common risk factors  
6 for CAD, including STEMI, are tobacco abuse, dyslipidemias, hypertension, diabetes  
7 mellitus, and a family history of CAD <sup>4</sup>. Myocardial infarction is the main cause of global  
8 morbidity, mortality, and major cardiovascular events (MACEs), representing 15% of the  
9 annual deaths worldwide <sup>5</sup>. In recent years, with the diagnosis and treatment guidelines, the  
10 continuous standardization of the treatment of STEMI, the increasing evidence of  
11 determinants of patient prognosis, and the continuous development of emerging  
12 technologies have contributed to a reduction in mortality; still, mortality seems to have  
13 plateaued <sup>3</sup>.

14 Primary percutaneous coronary intervention (PCI) has become the preferred reperfusion  
15 strategy in patients with STEMI according to the current clinical guidelines for STEMI in  
16 the United States and Europe <sup>6,7</sup>. Nevertheless, even if such patients receive timely PCI  
17 and/or appropriate antiplatelet drugs, the prognosis is still poor, and a substantial number  
18 of patients still die in-hospital after PCI. About 6% of STEMI patients die in the hospital <sup>3</sup>  
19 <sup>8,9</sup>. Therefore, there is still room for improving the short-term outcomes after PCI.

20 Various studies examined the risk factors of short- and long-term mortality of STEMI  
21 patients after PCI <sup>10-12</sup>. Guidelines encourage the use of clinical scores such as the  
22 thrombolysis in myocardial infarction (TIMI) or The Global Registry of Acute Coronary  
23 Events (GRACE) for STEMI to assess early- and long-term risk <sup>6,7,13</sup>. Several biomarkers

1 have been reported to confer independent prognostic information after STEMI, including  
2 Cardiac Troponin (cTn), Brain Natriuretic Peptide (BNP), amino-terminal pro-Brain  
3 Natriuretic Peptide (NT-proBNP), and D-dimer<sup>14-17</sup>. Unfortunately, these studies often  
4 exclude patients with advanced age, liver or kidney dysfunction, and other comorbidities  
5 and complications. Therefore, the generalizability of those studies is limited, and it is  
6 difficult to summarize and reflect the real-world treatment situation comprehensively.  
7 Therefore, the objective of this study was to develop a clinical nomogram for predicting  
8 in-hospital mortality of patients with STEMI after PCI. The results could provide clinical  
9 guidance and improve the outcome of STEMI patients.

## 1 PATIENTS AND METHODS

### 2 Study design and patients

3 This multicenter, retrospective, observational study included STEMI patients treated with  
4 PCI at 39 PCI hospitals in Hebei Province from January 2018 to December 2019. The  
5 cohort was divided into a training set and a time-independent validation set. The training  
6 set refers to the use of modeled data to verify the predictive effect of the model, while test  
7 set is to use another set of patients' data (namely external data) to verify the prediction  
8 accuracy of the model. The training set patients enrolled from January 2018 to December  
9 2018 and the testing set patients enrolled from January 2019 to December 2019.

10 All patients met the diagnostic criteria of acute STEMI based on their symptoms and/or  
11 ECG, myocardial damage markers and other test results and underwent primary PCI  
12 according to the 2017 ESC guidelines for the management of STEMI <sup>6</sup>, namely with  
13 persistent chest discomfort or other symptoms suggestive of ischemia and ST-segment  
14 elevation in at least two contiguous leads. Patients with non-ST segment myocardial  
15 infarction (NSTEMI) or unstable angina or STEMI patients who did not undergo PCI were  
16 excluded. Patients who were re-admitted to the hospital for revascularization of non-  
17 criminal vessels were also excluded. The treatment strategy after PCI of surviving patients  
18 is determined by the doctor in charge in accordance with relevant guidelines.

19 The study was approved by the Ethics Committees of Hebei General Hospital as the lead  
20 center and the ethics committee of each participating hospital. The requirement for  
21 informed consent was waived by the committee. The study was conducted according to the  
22 tenets of the Declaration of Helsinki for Medical Research Involving Human Subjects and  
23 Good Clinical Practice.

1  
2  
3 1  
4**2 Patient and Public Involvement**

3 Patients or the public were not involved in the design or reporting or dissemination plans  
4 of our research as this study is a retrospective, observational study.

**6 Definitions**

7 Long lesions was defined as the stenosis that has as  $\geq 50\%$  reduction and more than 20mm  
8 in luminal diameter<sup>18</sup>.

9 Residual stenosis was defined as  $> 30\%$  residual stenosis of the target lesion after PCI.

10 Bleeding was defined as a composite of major bleeding according to Bleeding Academic  
11 Research Consortium Definition for Bleeding (BARC) type 3 or 5, but was not related to  
12 coronary-artery bypass grafting (CABG)<sup>19</sup>.

**14 Data collection**

15 Demographics (age, sex, and BMI), medical history (hypertension, diabetes mellitus, atrial  
16 fibrillation (AF), hyperlipidemia and family history of coronary artery disease (CAD),  
17 stroke, renal failure, and peripheral artery disease), angiographic characteristics and  
18 information of cardiac procedures (disease condition, TIMI flow grade, number of stents,  
19 use of intra-aortic balloon pump (IABP), use of temporary pacemaker, use of ventilator,  
20 and whether there was no-reflow, coronary perforation, and cardiac arrest), medications on  
21 admission (antiplatelet agents,  $\beta$ -blockers, nitrate, angiotensin-converting enzyme  
22 inhibitors (ACEI), angiotensin receptor blockers (ARB), and statin), biochemical markers  
23 (N/L ratio), hematocrit (HCT), hemoglobin (HGB), platelets (PLT), and random blood

1 glucose on admission), and left ventricular ejection fraction (LVEF) after PCI were  
2 extracted from the medical charts. All treatments were according to the current guidelines.

#### 3 4 **Nomogram construction**

5 Demographics, medical history, vital signs before and after PCI, and auxiliary  
6 examinations were evaluated using univariable logistic regression. Variables with  $P < 0.05$   
7 in the univariable logistic analyses were included for multivariable logistic analysis and  
8 nomogram construction. Receiver operator characteristic (ROC) curve analysis was used  
9 to quantify the prediction performance of the nomogram. A calibration curve was used to  
10 evaluate the calibration of the nomogram, and its goodness of fit was assessed using the  
11 Hosmer-Lemeshow test. Finally, the clinical usefulness of the nomogram was assessed  
12 using a decision curve analysis (DCA).

#### 13 14 **Statistical analysis**

15 Statistical analyses were performed using R version 4.0.3 (R Foundation for Statistical  
16 Computing) with RStudio (version 1.3.959; RStudio, Auckland, New Zealand). R packages  
17 used in this study were rms, reader, tableone, pROC, ResourceSelection, and rmda. The  
18 predictive accuracy of the nomogram was measured using the C-statistic (Bootstrap  
19 method, 1000 times). Calibration was evaluated using the Hosmer-Lemeshow statistic.  
20 Categorical variables were presented as frequencies with percentages, normally distributed  
21 continuous variables as means  $\pm$  SD, and other data as medians with interquartile ranges  
22 (IQRs). Categorical variables were compared using the chi-square test or Fisher's test if  
23 the expected cell count was  $< 5$ . Student's t-test was used to compare normally distributed

1  
2  
3 1 continuous variables. Otherwise, the Mann-Whitney U-test was used. The significance  
4  
5 2 level was set at 0.05, and two-sided tests were used.  
6  
7  
8  
9  
10  
11  
12  
13  
14  
15  
16  
17  
18  
19  
20  
21  
22  
23  
24  
25  
26  
27  
28  
29  
30  
31  
32  
33  
34  
35  
36  
37  
38  
39  
40  
41  
42  
43  
44  
45  
46  
47  
48  
49  
50  
51  
52  
53  
54  
55  
56  
57  
58  
59  
60

For peer review only

## 1 RESULTS

### 2 Characteristics of the patients

3 The whole study population consisted of 855 patients diagnosed with STEMI and who  
4 underwent PCI, including 396 in the training set (132 (33.3%) dead patients and 264  
5 (66.7%) survivors) and 459 (91 (19.8%) dead patients, and 368 (80.2%) survivors) in the  
6 test set (Figure 1). The clinical characteristics, including demographic, medical history,  
7 angiographic characteristics, and information of cardiac procedures, medications, and  
8 biochemical markers, are summarized in Table 1. The patients who died in the hospital  
9 were older ( $69.8 \pm 10.2$  vs.  $60.2 \pm 12.6$  years,  $P < 0.01$ ), more likely to be women (32.7% vs.  
10 21.5%,  $P < 0.01$ ), and more had complications like hypertension, AF, and hyperlipidemia.  
11 The hospital stay was  $8.51 \pm 5.11$  days in the training set and  $8.32 \pm 4.70$  days in the test set.

### 13 Nomogram construction

14 According to the multivariable logistic analysis, the 10 variables were found to meet the  
15 threshold of  $P < 0.05$ . Age (OR=1.069, 95% CI=1.048-1.092,  $P=0.049$ ), BMI (OR=0.55, 95%  
16 CI=0.31-0.87,  $P=0.019$ ), SBP on admission (OR=0.92, 95% CI=0.86-0.97,  $P=0.009$ ),  
17 HGB (OR=0.85, 95% CI=0.73-0.97,  $P=0.017$ ), random blood glucose on admission  
18 (OR=1.53, 95% CI=1.13-2.21,  $P=0.011$ ), EF after PCI (OR=0.89, 95% CI=0.80-0.97,  
19  $P=0.015$ ), aspirin (OR=0.001, 95% CI=0.009-0.04,  $P=0.001$ ), N/L ratio (OR=1.34, 95%  
20 CI=1.12-1.69,  $P=0.004$ ), long lesions (OR=2.00, 95% CI=1.310-3.084,  $P < 0.001$ ), and  
21 TIMI flow grade (OR=2.15, 95% CI=1.242-3.900,  $P=0.008$ ) were independently  
22 associated with in-hospital mortality after PCI of STEMI (Table 2). The nomogram is  
23 shown in Figure 2. The formula for calculating the total point of the nomogram is



1 15.5628+0.0320×age-0.2991×BMI-0.0184×SBP-0.0331×HGB+0.3663×random blood  
2 glucose on admission-0.1188×LVEF after PCI-4.7705×aspirin+0.0521×N/L ratio-  
3 2.4688×long lesions+5.1018×TIMI flow grade.

#### 5 **Evaluation of the nomogram**

6 In the training set, the C-index was 0.947, indicating that the prediction model was valuable  
7 in clinical practice (Figure 3a). The value of goodness-of-fit was 0.683, indicating a good  
8 prediction accuracy. The ROC curve is shown in Figure 4a (AUC=0.947, 95% CI: 0.927-  
9 0.967). Figure 5a shows the DCA curve for the training set, indicating that the nomogram  
10 had a high overall net benefit in predicting in-hospital mortality after PCI treatment.

11 In the testing set, the C-index was 0.891. Figure 3b shows the calibration curve, and the  
12 value of goodness-of-fit was 0.462. The ROC curve is shown in Figure 4b (AUC=0.891,  
13 95% CI: 0.844-0.939). The DCA curve is shown in Figure 5b. The results of the testing set  
14 indicate that the nomogram had good discrimination and good prediction accuracy and  
15 could achieve a good net benefit.

## 1 DISCUSSION

2 In this study, a relatively accurate clinical nomogram was constructed, which demonstrated  
3 adequate discrimination and calibration power to provide an individualized estimation for  
4 the in-hospital mortality in STEMI patients after PCI. For the construction of the  
5 nomogram, 10 significant predictors were screened by multivariable logistic analysis.

6 In our study, age was an independent risk factor of STEMI patients, in accordance with  
7 other analyses of STEMI patients and underlining the high-risk profile of elderly patients,  
8 as they usually present with more risk factors and comorbidities than younger patients<sup>20 21</sup>,  
9 such as the higher prevalence of renal insufficiency, lower LVEF. High mortality in the  
10 older patients might also result from end-organ dysfunction, competing risks might also  
11 offset the benefits from reperfusion, such that successful outcomes are more dependent on  
12 overall health issues. Therefore, for older patients, some authors have also questioned the  
13 benefit of reperfusion therapy<sup>22</sup>.

14 The previous view is that obesity increases insulin resistance, worsens plasma lipid profiles,  
15 and increases arterial blood pressure, and thus has adverse effects on patients with CAD  
16 through the indirect effects of other risk factors (such as hypertension, impaired glucose  
17 tolerance, and hyperinsulinemia)<sup>23</sup>. Therefore, obese patients demonstrate greater adverse  
18 left ventricle (LV) remodeling and more impaired LV deformation after STEMI compared  
19 with those similar infarct characteristics but normal BMI<sup>24 25</sup>. Interestingly, some studies  
20 have shown the so-called “obesity paradox”, whereby obesity is related to better clinical  
21 outcomes<sup>23 26-28</sup>, consistent with the present study. Fukuoka et al.<sup>29</sup> reported that this  
22 phenomenon is only observed in elderly patients, not in younger patients, so the influence  
23 of BMI on risk factors for death might vary with age. Nevertheless, obesity is currently

1  
2  
3 1 recognized as a risk factor for the long-term prognosis of patients with CAD, and it is worth  
4  
5 2 recommending maintaining BMI at a normal level <sup>29</sup>.

6  
7 3 Acute stress has been shown to regulate the immune response of lymphocytes and reduce  
8  
9 4 the number of peripheral blood lymphocytes. The smaller the value, the higher the body's  
10  
11 5 stress level. Therefore, the N/L ratio, as an index for systemic inflammatory status and  
12  
13 6 usually increases after STEMI <sup>30-32</sup>. Pan et al. <sup>33</sup> demonstrated the independent association  
14  
15 7 between increased N/L ratio and short-term mortality in STEMI patients after PCI. The  
16  
17 8 predictive value of the N/L ratio may be based on the following reasons. Stimulated  
18  
19 9 neutrophils release superoxide radicals, proteolytic enzymes, and arachidonic acid  
20  
21 10 metabolites that increase the infarct size and lead to cardiac electrical instability by  
22  
23 11 damaging endothelial cells, activating coagulation cascade, aggregation of leukocytic cells,  
24  
25 12 and plugging the micro-arteries <sup>34</sup>. These actions will participate in the extension of the  
26  
27 13 areas of myocardial infarction, impaired epicardial and microvascular perfusion, no-  
28  
29 14 reflow/slow flow during PCI, decreased LVEF, and post-infarction death <sup>35-37</sup>.

30  
31 15 The acute phase of STEMI leads to insulin resistance, glucose intolerance, and  
32  
33 16 hyperglycemia. The elevated levels of cytokines, growth hormone, glucagon, and cortisol  
34  
35 17 result in increased hepatic glucose production. Hepatic glycogenolysis is further enhanced  
36  
37 18 by catecholamines that also inhibit glycogenesis and stimulate the release of free fatty acids  
38  
39 19 (FFAs). High concentrations of FFAs will increase myocardial oxygen requirement, reduce  
40  
41 20 myocardial activity and contractility, impair calcium homeostasis and increase the  
42  
43 21 production of free radicals, leading to an increased risk of myocardial damage and  
44  
45 22 arrhythmias <sup>38-41</sup>. Thus, acute hyperglycemia might contribute to a poor outcome. Previous  
46  
47 23 studies reported that higher admission glucose was strongly correlated with larger infarct  
48  
49  
50  
51  
52  
53  
54  
55  
56  
57  
58  
59  
60

1 size, lower LVEF, and increased mortality risk in patients with and without diabetes <sup>42 43</sup>.

2 Exercise training, dietary modifications, and intervention in the hospital, such as tight

3 glycemic control during early PCI or at least within 24 h after STEMI might reduce the

4 mortality risk in such patients <sup>44 45</sup>.

5 Lower admission HGB was associated with higher in-hospital mortality when analyzed as

6 a continuous variable (OR=0.966, 95%CI: 0.954-0.978). The total ischemic time in patients

7 with AMI is inversely proportional to the drop in HGB concentration <sup>46</sup>. HGB levels and

8 inflammation are closely related; in patients with inflammation, inflammation block occurs,

9 that is, an abundance of hepcidin leads to poor uptake of iron from the gastrointestinal tract,

10 iron sequestration in macrophages, little iron recycling to the erythron for red-cell

11 production, and microcytic anemia, which can cause a lower HGB level. <sup>47</sup>.

12 Because of the important role of platelets in thrombus formation, the present study showed

13 that prior aspirin use could reduce in-hospital mortality of STEMI patients after PCI, as

14 supported by earlier clinical trials <sup>48 49</sup>. Weidmann et al. <sup>49</sup> provided evidence suggesting

15 that pre-existing treatment with aspirin favorably affected the clinical presentation, infarct

16 size, and degree of inflammation of patients with STEMI. Yonetsu et al. <sup>50</sup> reported that

17 aspirin inhibits platelet aggregation and therefore reduces the probability of an occluding

18 clot on top of a ruptured plaque and, conversely, the occurrence of STEMI.

19 Previous studies indicated that lesion length is associated with long-term adverse events

20 after PCI and is an important risk factor for restenosis and stent thrombosis <sup>51-53</sup>. A longer

21 lesion, with its greater plaque burden, is conceived to provide a major source of smooth

22 muscle cells that will then proliferate to form neointima. Atherosclerotic plaques have often

23 been found to demonstrate an increased expression of isoforms characteristic of activated

1 smooth muscle cells that are not present in normal vasculature<sup>54</sup>. Still, there are few studies  
2 on lesion length and in-hospital mortality, and further studies are still necessary.  
3 Preprocedural reperfusion might have a prognostic value<sup>55</sup>. A strong relationship exists  
4 between preprocedural TIMI flow grade and infarct size and predischage LVEF<sup>56</sup>. SBP  
5 is a critical factor, and hypotension was associated with a decrease in survival<sup>57</sup>.

6 In our multivariate analysis, the higher Killip Class is not a predictor of in-hospital  
7 mortality in STEMI patients. However, in a recent work from Del Buono et al<sup>58</sup>, it was  
8 proved that a higher Killip Class is an independent risk factor for MACE events and in-  
9 hospital mortality in patients with anterior myocardial infarction. This the first study  
10 including only patients with STEMI in the anterior location and excluding patients with  
11 history of cardiovascular diseases in order to reduce the heterogeneity of the population  
12 enrolled. This may be one of the reasons for the inconsistency of the two studies.  
13 Nevertheless, Killip classification is a simple and convenient clinical tool that can quickly  
14 stratify the risk of ACS patients and is likely to become an independent predictor of long-  
15 term follow-up results again.

16 The nomogram is a simple and intuitive representation of the mathematical model<sup>59</sup>.  
17 In addition, to be of clinical usefulness in a routine setting, the nomogram must contain  
18 variables assessed in the routine clinical setting, which is the case with the nomogram  
19 developed here. It can simplify the statistical prediction model to the numerical probability  
20 of disease recurrence or death. The identification and stratification of patients becomes a  
21 simple tool with many advantages. The most prominent advantage is that it can predict

1 individualized risks based on patient and disease characteristics. Secondly, it is easy to use  
2 and can help doctors develop individualized treatment plans. However, although the  
3 current clinical use of nomograms has increased, there are limited data on patient  
4 satisfaction or quality of life after it assists in medical decision-making. In addition,  
5 although nomograms are widely used clinically, they are rarely evaluated prospectively to  
6 determine whether their use actually improves the prognosis of patients<sup>60 61</sup>. Therefore, it  
7 remains to be explored how this risk model can be better applied to the clinic. The results  
8 indicate that the nomogram had good discrimination and good prediction accuracy and  
9 could achieve good net benefit. Another nomogram based on other variables (left main  
10 coronary artery disease, grading of thrombus, TIMI classification, slow flow, use of IABP,  
11 use of  $\beta$ -blocker, use of ACEI/ARB, symptom-to-door time, symptom-to-balloon time,  
12 syntax score, LVEF, and CK-MB peak) also showed a high AUC for in-hospital mortality  
13 of patients with STEMI after PCI<sup>62</sup>. We think there may be three main reasons: different  
14 research methods, the hospitals and time nodes that included patients are different and  
15 different statistical methods. Nevertheless, we are planning to combine the two parts of  
16 patients to get a more accurate risk model of in-hospital mortality.

17 Some study limitations should be mentioned. 1. This study has limitations that are inherent  
18 to retrospective observational studies. Many hospitals and doctors involved, which can lead  
19 to some missing information, such as liver enzymes, more information regarding the PCI  
20 procedure and other inflammatory index. 2. As the ischemic time is shortened as much as

1 possible, patients whose symptoms and/or ECG can be diagnosed are directly treated with  
2 PCI. Therefore, other potential risk factors in our study, such as LVEF before PCI, could  
3 not be included in the analyses. And because some patients died during the PCI, resulting  
4 in the lack of postoperative treatment information. However, further prospective studies  
5 are still necessary to confirm the performance of the clinical applicability in future  
6 investigations and verify the practicality in ICU.

7 In conclusion, a nomogram to predict in-hospital mortality in patients with STEMI after  
8 PCI was developed and validated in Hebei, China. The nomogram showed a satisfactory  
9 performance, with a C-index of 0.948. Thus, this nomogram might be a precisely  
10 individualized predictive tool for prognosis. Still, additional studies are needed to  
11 determine whether it can be applied to other populations before its implementation in  
12 clinical practice.

## 1 **Acknowledgements**

2 We acknowledge the members of the heart team at the participating centers for their efforts  
3 in collecting clinical data and ensuring the accuracy and completeness of the data. We  
4 thank the study participants and patient advisers for accepting to be part of the study for  
5 working tirelessly to make this work a reality.

## 6 **Funding**

7 None.

## 8 **Competing Interests**

9 The authors of this work have nothing to disclose.

## 10 **Ethical standards disclosure**

11 The study was approved by the Ethics Committees of Hebei General Hospital as the lead  
12 center and the ethics committee of each participating hospital (No. 202144). The  
13 requirement for informed consent was waived by the committee. The study was conducted  
14 according to the tenets of the Declaration of Helsinki for Medical Research Involving  
15 Human Subjects and Good Clinical Practice.

## 16 **Authors' contribution**

17 Yudan Wang, Wenjing Wang, Man Gao and Shihang Zheng carried out the studies,  
18 participated in collecting data, and drafted the manuscript. Yudan Wang, Yi Dang and  
19 Xiaoyong Qi performed the statistical analysis and participated in its design. Shengqi Jia,



1  
2  
3 1 Jiaqi Wang and Yingxiao Li helped to draft the manuscript. All authors read and approved  
4  
5 2 the final manuscript.

6  
7  
8 3

9  
10 4 **Data availability statement**

11  
12 5 No additional data are available.  
13  
14  
15  
16  
17  
18  
19  
20  
21  
22  
23  
24  
25  
26  
27  
28  
29  
30  
31  
32  
33  
34  
35  
36  
37  
38  
39  
40  
41  
42  
43  
44  
45  
46  
47  
48  
49  
50  
51  
52  
53  
54  
55  
56  
57  
58  
59  
60

For peer review only

## 1 REFERENCES

- 1 1. O'Gara PT, Kushner FG, Ascheim DD, et al. 2013 ACCF/AHA guideline for the management of  
2 ST-elevation myocardial infarction: a report of the American College of Cardiology  
3 Foundation/American Heart Association Task Force on Practice Guidelines. *Circulation*  
4 2013;127(4):e362-425. doi: 10.1161/CIR.0b013e3182742cf6.
- 5 2. Trost JC, Lange RA. Treatment of acute coronary syndrome: part 2: ST-segment elevation  
6 myocardial infarction. *Crit Care Med* 2012;40(6):1939-45. doi:  
7 10.1097/CCM.0b013e31824e18c2.
- 8 3. Vogel B, Claessen BE, Arnold SV, et al. ST-segment elevation myocardial infarction. *Nature*  
9 *reviews Disease primers* 2019;5(1):39. doi: 10.1038/s41572-019-0090-3.
- 10 4. Authors/Task Force M, Piepoli MF, Hoes AW, et al. 2016 European Guidelines on cardiovascular  
11 disease prevention in clinical practice: The Sixth Joint Task Force of the European Society  
12 of Cardiology and Other Societies on Cardiovascular Disease Prevention in Clinical  
13 Practice (constituted by representatives of 10 societies and by invited experts): Developed  
14 with the special contribution of the European Association for Cardiovascular Prevention &  
15 Rehabilitation (EACPR). *Eur J Prev Cardiol* 2016;23(11):NP1-NP96. doi:  
16 10.1177/2047487316653709.
- 17 5. Jayaraj JC, Davatyan K, Subramanian SS, et al. Epidemiology of Myocardial Infarction. In:  
18 Pamkucu B, ed. Myocardial Infarction. London: IntechOpen 2018.
- 19 6. Ibanez B, James S, Agewall S, et al. 2017 ESC Guidelines for the management of acute  
20 myocardial infarction in patients presenting with ST-segment elevation: The Task Force for  
21

- 1  
2  
3  
4 1 the management of acute myocardial infarction in patients presenting with ST-segment  
5  
6 2 elevation of the European Society of Cardiology (ESC). *European heart journal*  
7  
8  
9 3 2018;39(2):119-77. doi: 10.1093/eurheartj/ehx393.  
10  
11  
12 4 7. O'Gara PT, Kushner FG, Ascheim DD, et al. 2013 ACCF/AHA guideline for the management of  
13  
14 5 ST-elevation myocardial infarction: a report of the American College of Cardiology  
15  
16 6 Foundation/American Heart Association Task Force on Practice Guidelines. *Journal of the*  
17  
18 7 *American College of Cardiology* 2013;61(4):e78-e140. doi: 10.1016/j.jacc.2012.11.019.  
19  
20  
21  
22 8 8. Li J, Li X, Wang Q, et al. ST-segment elevation myocardial infarction in China from 2001 to 2011  
23  
24 9 (the China PEACE-Retrospective Acute Myocardial Infarction Study): a retrospective  
25  
26 10 analysis of hospital data. *Lancet*. 2015;385(9966):441-51. doi: 10.1016/S0140-  
27  
28 11 6736(14)60921-1.  
29  
30  
31  
32 12 9. Canto JG, Kiefe CI, Rogers WJ, et al. Number of coronary heart disease risk factors and mortality  
33  
34 13 in patients with first myocardial infarction. *JAMA* 2011;306(19):2120-7. doi:  
35  
36 14 10.1001/jama.2011.1654.  
37  
38  
39  
40 15 10. Cenko E, Yoon J, Kedev S, et al. Sex Differences in Outcomes After STEMI: Effect Modification  
41  
42 16 by Treatment Strategy and Age. *JAMA internal medicine* 2018;178(5):632-39. doi:  
43  
44 17 10.1001/jamainternmed.2018.0514.  
45  
46  
47  
48 18 11. Mehta SR, Wood DA, Storey RF, et al. Complete Revascularization with Multivessel PCI for  
49  
50 19 Myocardial Infarction. *The New England journal of medicine* 2019;381(15):1411-21. doi:  
51  
52 20 10.1056/NEJMoa1907775.  
53  
54  
55  
56  
57  
58  
59  
60

- 1  
2  
3  
4 1 12. Scholz KH, Maier SKG, Maier LS, et al. Impact of treatment delay on mortality in ST-segment  
5  
6 2 elevation myocardial infarction (STEMI) patients presenting with and without  
7  
8 3 haemodynamic instability: results from the German prospective, multicentre FITT-STEMI  
9  
10 4 trial. *European heart journal* 2018;39(13):1065-74. doi: 10.1093/eurheartj/ehy004.  
11  
12  
13  
14 5 13. Levine GN, Bates ER, Bittl JA, et al. 2016 ACC/AHA Guideline Focused Update on Duration of  
15  
16 6 Dual Antiplatelet Therapy in Patients With Coronary Artery Disease: A Report of the  
17  
18 7 American College of Cardiology/American Heart Association Task Force on Clinical  
19  
20 8 Practice Guidelines: An Update of the 2011 ACCF/AHA/SCAI Guideline for Percutaneous  
21  
22 9 Coronary Intervention, 2011 ACCF/AHA Guideline for Coronary Artery Bypass Graft  
23  
24 10 Surgery, 2012 ACC/AHA/ACP/AATS/PCNA/SCAI/STS Guideline for the Diagnosis and  
25  
26 11 Management of Patients With Stable Ischemic Heart Disease, 2013 ACCF/AHA Guideline  
27  
28 12 for the Management of ST-Elevation Myocardial Infarction, 2014 AHA/ACC Guideline for  
29  
30 13 the Management of Patients With Non-ST-Elevation Acute Coronary Syndromes, and 2014  
31  
32 14 ACC/AHA Guideline on Perioperative Cardiovascular Evaluation and Management of  
33  
34 15 Patients Undergoing Noncardiac Surgery. *Circulation* 2016;134(10):e123-55. doi:  
35  
36 16 10.1161/cir.0000000000000404.  
37  
38  
39  
40  
41  
42  
43  
44  
45 17 14. Ottani F, Galvani M, Nicolini FA, et al. Elevated cardiac troponin levels predict the risk of  
46  
47 18 adverse outcome in patients with acute coronary syndromes. *American heart journal*  
48  
49 19 2000;140(6):917-27. doi: 10.1067/mhj.2000.111107.  
50  
51  
52  
53 20 15. Sun T, Wang L, Zhang Y. Prognostic value of B-type natriuretic peptide in patients with acute  
54  
55  
56  
57  
58  
59  
60

- 1  
2  
3  
4 1 coronary syndromes. *Archives of medical research* 2006;37(4):502-5. doi:  
5  
6 10.1016/j.arcmed.2005.09.007.  
7  
8  
9 3 16. Jaberg L, Toggweiler S, Puck M, et al. Prognostic value of N-terminal pro-B-type natriuretic  
10  
11 4 peptide in patients with acute coronary syndromes undergoing left main percutaneous  
12  
13 5 coronary intervention. *Circulation journal : official journal of the Japanese Circulation*  
14  
15 6 *Society* 2011;75(11):2648-53. doi: 10.1253/circj.cj-11-0095.  
16  
17  
18  
19 7 17. Yu T, Jiao Y, Song J, et al. Hospital mortality in acute coronary syndrome: adjustment of  
20  
21 8 GRACE score by D-dimer enables a more accurate prediction in a prospective cohort study.  
22  
23 9 *BMC cardiovascular disorders* 2019;19(1):252. doi: 10.1186/s12872-019-1239-4.  
24  
25  
26  
27 10 18. Sianos G, Morel MA, Kappetein AP, et al. The SYNTAX Score: an angiographic tool grading  
28  
29 11 the complexity of coronary artery disease. *EuroIntervention : journal of EuroPCR in*  
30  
31 12 *collaboration with the Working Group on Interventional Cardiology of the European Society*  
32  
33 13 *of Cardiology* 2005;1(2):219-27.  
34  
35  
36  
37 14 19. Mehran R, Rao SV, Bhatt DL, et al. Standardized bleeding definitions for cardiovascular clinical  
38  
39 15 trials: a consensus report from the Bleeding Academic Research Consortium. *Circulation*  
40  
41 16 2011;123(23):2736-47. doi: 10.1161/circulationaha.110.009449.  
42  
43  
44  
45 17 20. Forman DE, Chen AY, Wiviott SD, et al. Comparison of outcomes in patients aged <75, 75 to  
46  
47 18 84, and  $\geq$  85 years with ST-elevation myocardial infarction (from the ACTION Registry-  
48  
49 19 GWTG). *The American journal of cardiology* 2010;106(10):1382-8. doi:  
50  
51 20 10.1016/j.amjcard.2010.07.008.  
52  
53  
54  
55  
56  
57  
58  
59  
60

- 1  
2  
3  
4 1 21. Rathod KS, Jones DA, Gallagher S, et al. Atypical risk factor profile and excellent long-term  
5  
6 2 outcomes of young patients treated with primary percutaneous coronary intervention for  
7  
8 3 ST-elevation myocardial infarction. *European heart journal Acute cardiovascular care*  
9  
10 4 2016;5(1):23-32. doi: 10.1177/2048872614567453.  
11  
12  
13  
14 5 22. Haller PM, Jäger B, Farhan S, et al. Impact of age on short- and long-term mortality of patients  
15  
16 6 with ST-elevation myocardial infarction in the VIENNA STEMI network. *Wiener klinische*  
17  
18 7 *Wochenschrift* 2018;130(5-6):172-81. doi: 10.1007/s00508-017-1250-7.  
19  
20  
21  
22 8 23. Lavie CJ, De Schutter A, Milani RV. Healthy obese versus unhealthy lean: the obesity paradox.  
23  
24 9 *Nature reviews Endocrinology* 2015;11(1):55-62. doi: 10.1038/nrendo.2014.165.  
25  
26  
27  
28 10 24. Payvar S, Kim S, Rao SV, et al. In-hospital outcomes of percutaneous coronary interventions  
29  
30 11 in extremely obese and normal-weight patients: findings from the NCDR (National  
31  
32 12 Cardiovascular Data Registry). *Journal of the American College of Cardiology*  
33  
34 13 2013;62(8):692-6. doi: 10.1016/j.jacc.2013.05.058.  
35  
36  
37  
38 14 25. Winzap P, Davies A, Klingenberg R, et al. Diabetes and baseline glucose are associated with  
39  
40 15 inflammation, left ventricular function and short- and long-term outcome in acute coronary  
41  
42 16 syndromes: role of the novel biomarker Cyr 61. *Cardiovascular diabetology* 2019;18(1):142.  
43  
44 17 doi: 10.1186/s12933-019-0946-6.  
45  
46  
47  
48 18 26. Samanta R, Pouliopoulos J, Kumar S, et al. Influence of BMI on inducible ventricular  
49  
50 19 tachycardia and mortality in patients with myocardial infarction and left ventricular  
51  
52 20 dysfunction: The obesity paradox. *International journal of cardiology* 2018;265:148-54. doi:

- 1  
2  
3  
4 1 10.1016/j.ijcard.2018.03.055.  
5  
6  
7 2 27. Lavie CJ, Milani RV, Ventura HO. Obesity and cardiovascular disease: risk factor, paradox, and  
8  
9 3 impact of weight loss. *Journal of the American College of Cardiology* 2009;53(21):1925-  
10  
11 4 32. doi: 10.1016/j.jacc.2008.12.068.  
12  
13  
14 5 28. Samanta R, Narayan A, Kovoov P, et al. Influence of BMI on Short and Long-Term Outcomes  
15  
16 6 in Patients With STEMI and LV Dysfunction. *Heart, lung & circulation* 2020;29(3):361-67.  
17  
18 7 doi: 10.1016/j.hlc.2019.01.017.  
19  
20  
21  
22 8 29. Fukuoka S, Kurita T, Dohi K, et al. Untangling the obesity paradox in patients with acute  
23  
24 9 myocardial infarction after primary percutaneous coronary intervention (detail analysis by  
25  
26 10 age). *International journal of cardiology* 2019;289:12-18. doi: 10.1016/j.ijcard.2019.01.011.  
27  
28  
29  
30 11 30. Ayça B, Akın F, Celik O, et al. Neutrophil to Lymphocyte Ratio is Related to Stent Thrombosis  
31  
32 12 and High Mortality in Patients With Acute Myocardial Infarction. *Angiology* 2015;66(6):545-  
33  
34 13 52. doi: 10.1177/0003319714542997.  
35  
36  
37  
38 14 31. Machado GP, Araujo GN, Carpes CK, et al. Comparison of neutrophil-to-lymphocyte ratio and  
39  
40 15 mean platelet volume in the prediction of adverse events after primary percutaneous  
41  
42 16 coronary intervention in patients with ST-elevation myocardial infarction. *Atherosclerosis*  
43  
44 17 2018;274:212-17. doi: 10.1016/j.atherosclerosis.2018.05.022.  
45  
46  
47  
48 18 32. Arbel Y, Shacham Y, Ziv-Baran T, et al. Higher neutrophil/lymphocyte ratio is related to lower  
49  
50 19 ejection fraction and higher long-term all-cause mortality in ST-elevation myocardial  
51  
52 20 infarction patients. *The Canadian journal of cardiology* 2014;30(10):1177-82. doi:

- 1  
2  
3  
4 1 10.1016/j.cjca.2014.05.010.  
5  
6  
7 2 33. Pan W, Zhao D, Zhang C, et al. Application of neutrophil/lymphocyte ratio in predicting coronary  
8  
9 3 blood flow and mortality in patients with ST-elevation myocardial infarction undergoing  
10  
11 4 percutaneous coronary intervention. *Journal of cardiology* 2015;66(1):9-14. doi:  
12  
13 5 10.1016/j.jjcc.2014.10.014.  
14  
15  
16  
17 6 34. Sen N, Afsar B, Ozcan F, et al. The neutrophil to lymphocyte ratio was associated with impaired  
18  
19 7 myocardial perfusion and long term adverse outcome in patients with ST-elevated  
20  
21 8 myocardial infarction undergoing primary coronary intervention. *Atherosclerosis*  
22  
23 9 2013;228(1):203-10. doi: 10.1016/j.atherosclerosis.2013.02.017.  
24  
25  
26  
27 10 35. Kaya MG, Akpek M, Lam YY, et al. Prognostic value of neutrophil/lymphocyte ratio in patients  
28  
29 11 with ST-elevated myocardial infarction undergoing primary coronary intervention: a  
30  
31 12 prospective, multicenter study. *International journal of cardiology* 2013;168(2):1154-9. doi:  
32  
33 13 10.1016/j.ijcard.2012.11.074.  
34  
35  
36  
37  
38 14 36. Kirtane AJ, Bui A, Murphy SA, et al. Association of peripheral neutrophilia with adverse  
39  
40 15 angiographic outcomes in ST-elevation myocardial infarction. *The American journal of*  
41  
42 16 *cardiology* 2004;93(5):532-6. doi: 10.1016/j.amjcard.2003.11.013.  
43  
44  
45  
46 17 37. Sheridan FM, Cole PG, Ramage D. Leukocyte adhesion to the coronary microvasculature  
47  
48 18 during ischemia and reperfusion in an in vivo canine model. *Circulation* 1996;93(10):1784-7.  
49  
50 19 doi: 10.1161/01.cir.93.10.1784.  
51  
52  
53 20 38. Dandona P, Chaudhuri A, Ghanim H, et al. Insulin as an anti-inflammatory and antiatherogenic  
54  
55  
56  
57  
58  
59  
60



- 1  
2  
3  
4 1 modulator. *Journal of the American College of Cardiology* 2009;53(5 Suppl):S14-20. doi:  
5  
6 2 10.1016/j.jacc.2008.10.038.  
7  
8  
9 3 39. Devos P, Chioléro R, Van den Berghe G, et al. Glucose, insulin and myocardial ischaemia.  
10  
11 4 *Current opinion in clinical nutrition and metabolic care* 2006;9(2):131-9. doi:  
12  
13 5 10.1097/01.mco.0000214572.97933.d1.  
14  
15  
16  
17 6 40. Young LH, Renfu Y, Russell R, et al. Low-flow ischemia leads to translocation of canine heart  
18  
19 7 GLUT-4 and GLUT-1 glucose transporters to the sarcolemma in vivo. *Circulation*  
20  
21 8 1997;95(2):415-22. doi: 10.1161/01.cir.95.2.415.  
22  
23  
24  
25 9 41. Khani S, Tayek JA. Cortisol increases gluconeogenesis in humans: its role in the metabolic  
26  
27 10 syndrome. *Clinical science (London, England : 1979)* 2001;101(6):739-47. doi:  
28  
29 11 10.1042/cs1010739.  
30  
31  
32  
33 12 42. Timmer JR, van der Horst IC, Ottervanger JP, et al. Prognostic value of admission glucose in  
34  
35 13 non-diabetic patients with myocardial infarction. *American heart journal* 2004;148(3):399-  
36  
37 14 404. doi: 10.1016/j.ahj.2004.04.007.  
38  
39  
40  
41 15 43. Planer D, Witzendichler B, Guagliumi G, et al. Impact of hyperglycemia in patients with ST-  
42  
43 16 segment elevation myocardial infarction undergoing percutaneous coronary intervention:  
44  
45 17 the HORIZONS-AMI trial. *International journal of cardiology* 2013;167(6):2572-9. doi:  
46  
47 18 10.1016/j.ijcard.2012.06.054.  
48  
49  
50  
51 19 44. Buchanan TA, Xiang AH, Peters RK, et al. Preservation of pancreatic beta-cell function and  
52  
53 20 prevention of type 2 diabetes by pharmacological treatment of insulin resistance in high-

- 1 risk hispanic women. *Diabetes* 2002;51(9):2796-803. doi: 10.2337/diabetes.51.9.2796.
- 2  
3
- 4 1 risk hispanic women. *Diabetes* 2002;51(9):2796-803. doi: 10.2337/diabetes.51.9.2796.
- 5
- 6 45. Marfella R, Sasso FC, Siniscalchi M, et al. Peri-procedural tight glycemic control during early
- 7
- 8 percutaneous coronary intervention is associated with a lower rate of in-stent restenosis in
- 9
- 10 patients with acute ST-elevation myocardial infarction. *The Journal of clinical*
- 11
- 12 *endocrinology and metabolism* 2012;97(8):2862-71. doi: 10.1210/jc.2012-1364.
- 13
- 14
- 15
- 16
- 17 46. Shacham Y, Leshem-Rubinow E, Ben-Assa E, et al. Lower admission hemoglobin levels are
- 18
- 19 associated with longer symptom duration in acute ST-elevation myocardial infarction.
- 20
- 21
- 22 *Clinical cardiology* 2014;37(2):73-7. doi: 10.1002/clc.22215.
- 23
- 24
- 25 47. Keel SB, Abkowitz JL. The microcytic red cell and the anemia of inflammation. *The New*
- 26
- 27 *England journal of medicine* 2009;361(19):1904-6. doi: 10.1056/NEJMcibr0906391.
- 28
- 29
- 30 48. Brener SJ, Mehran R, Lansky AJ, et al. Pretreatment with aspirin in acute coronary syndromes:
- 31
- 32 Lessons from the ACUITY and HORIZONS-AMI trials. *European heart journal Acute*
- 33
- 34 *cardiovascular care* 2016;5(5):449-54. doi: 10.1177/2048872615624848.
- 35
- 36
- 37
- 38 49. Weidmann L, Obeid S, Mach F, et al. Pre-existing treatment with aspirin or statins influences
- 39
- 40 clinical presentation, infarct size and inflammation in patients with de novo acute coronary
- 41
- 42 syndromes. *International journal of cardiology* 2019;275:171-78. doi:
- 43
- 44 10.1016/j.ijcard.2018.10.050.
- 45
- 46
- 47
- 48 50. Yonetsu T, Lee T, Murai T, et al. Association Between Prior Aspirin Use and Morphological
- 49
- 50 Features of Culprit Lesions at First Presentation of Acute Coronary Syndrome Assessed
- 51
- 52 by Optical Coherence Tomography. *Circulation journal : official journal of the Japanese*
- 53
- 54
- 55
- 56
- 57
- 58
- 59
- 60

- 1  
2  
3  
4 1 *Circulation Society* 2017;81(4):511-19. doi: 10.1253/circj.CJ-16-0957.  
5  
6  
7 2 51. Claessen BE, Smits PC, Kereiakes DJ, et al. Impact of lesion length and vessel size on clinical  
8  
9 3 outcomes after percutaneous coronary intervention with everolimus- versus paclitaxel-  
10  
11 4 eluting stents pooled analysis from the SPIRIT (Clinical Evaluation of the XIENCE V  
12  
13  
14 5 Everolimus Eluting Coronary Stent System) and COMPARE (Second-generation  
15  
16 6 everolimus-eluting and paclitaxel-eluting stents in real-life practice) Randomized Trials.  
17  
18  
19 7 *JACC Cardiovascular interventions* 2011;4(11):1209-15. doi: 10.1016/j.jcin.2011.07.016.  
20  
21  
22 8 52. Kastrati A, Elezi S, Dirschinger J, et al. Influence of lesion length on restenosis after coronary  
23  
24 9 stent placement. *The American journal of cardiology* 1999;83(12):1617-22. doi:  
25  
26 10 10.1016/s0002-9149(99)00165-4.  
27  
28  
29  
30 11 53. Choi IJ, Koh YS, Lim S, et al. Impact of the stent length on long-term clinical outcomes following  
31  
32 12 newer-generation drug-eluting stent implantation. *The American journal of cardiology*  
33  
34 13 2014;113(3):457-64. doi: 10.1016/j.amjcard.2013.10.029.  
35  
36  
37  
38 14 54. Leclerc G, Isner JM, Kearney M, et al. Evidence implicating nonmuscle myosin in restenosis.  
39  
40 15 Use of in situ hybridization to analyze human vascular lesions obtained by directional  
41  
42 16 atherectomy. *Circulation* 1992;85(2):543-53. doi: 10.1161/01.cir.85.2.543.  
43  
44  
45  
46 17 55. Brodie BR, Stuckey TD, Hansen C, et al. Benefit of coronary reperfusion before intervention on  
47  
48 18 outcomes after primary angioplasty for acute myocardial infarction. *The American journal*  
49  
50 19 *of cardiology* 2000;85(1):13-8. doi: 10.1016/s0002-9149(99)00598-6.  
51  
52  
53 20 56. De Luca G, Ernst N, Zijlstra F, et al. Preprocedural TIMI flow and mortality in patients with acute  
54  
55  
56  
57  
58  
59  
60

- 1  
2  
3  
4 1 myocardial infarction treated by primary angioplasty. *Journal of the American College of*  
5  
6  
7 2 *Cardiology* 2004;43(8):1363-7. doi: 10.1016/j.jacc.2003.11.042.  
8  
9 3 57. Lee KL, Woodlief LH, Topol EJ, et al. Predictors of 30-day mortality in the era of reperfusion for  
10  
11 4 acute myocardial infarction. Results from an international trial of 41,021 patients. GUSTO-I  
12  
13 5 Investigators. *Circulation* 1995;91(6):1659-68. doi: 10.1161/01.cir.91.6.1659.  
14  
15  
16 6 58. Del Buono MG, Montone RA, Rinaldi R, et al. Clinical predictors and prognostic role of high  
17  
18 7 Killip class in patients with a first episode of anterior ST-segment elevation acute  
19  
20 8 myocardial infarction. *Journal of cardiovascular medicine (Hagerstown, Md)*  
21  
22 9 2021;22(7):530-38. doi: 10.2459/jcm.0000000000001168.  
23  
24  
25 10 59. Shariat SF, Karakiewicz PI, Godoy G, et al. Use of nomograms for predictions of outcome in  
26  
27 11 patients with advanced bladder cancer. *Ther Adv Urol* 2009;1(1):13-26. doi:  
28  
29 12 10.1177/1756287209103923.  
30  
31  
32 13 60. Balachandran VP, Gonen M, Smith JJ, et al. Nomograms in oncology: more than meets the  
33  
34 14 eye. *The Lancet Oncology* 2015;16(4):e173-80. doi: 10.1016/s1470-2045(14)71116-7.  
35  
36  
37 15 61. Iasonos A, Schrag D, Raj GV, et al. How to build and interpret a nomogram for cancer prognosis.  
38  
39 16 *Journal of clinical oncology : official journal of the American Society of Clinical Oncology*  
40  
41 17 2008;26(8):1364-70. doi: 10.1200/jco.2007.12.9791.  
42  
43  
44 18 62. Gao N, Qi X, Dang Y, et al. Establishment and validation of a risk model for prediction of in-  
45  
46 19 hospital mortality in patients with acute ST-elevation myocardial infarction after primary PCI.  
47  
48 20 *BMC cardiovascular disorders* 2020;20(1):513. doi: 10.1186/s12872-020-01804-7.  
49  
50  
51  
52  
53  
54  
55  
56  
57  
58  
59  
60

1  
2  
3 1  
4  
5  
6  
7  
8  
9  
10  
11  
12  
13  
14  
15  
16  
17  
18  
19  
20  
21  
22  
23  
24  
25  
26  
27  
28  
29  
30  
31  
32  
33  
34  
35  
36  
37  
38  
39  
40  
41  
42  
43  
44  
45  
46  
47  
48  
49  
50  
51  
52  
53  
54  
55  
56  
57  
58  
59  
60

For peer review only

1  
2  
3  
4  
5 **Table 1 Clinical characteristics of the patients used to construct the nomogram**

| Variables                                           | Training set      |                   |                                  |          | Testing set       |                  |                                 |          |
|-----------------------------------------------------|-------------------|-------------------|----------------------------------|----------|-------------------|------------------|---------------------------------|----------|
|                                                     | All<br>(n=396)    | Survival (n=264)  | In-hospital<br>mortality (n=132) | <i>P</i> | All<br>(n=459)    | Survival (n=368) | In-hospital<br>mortality (n=91) | <i>P</i> |
| Age (years) (mean ±SD)                              | 63.3±12.7         | 60.3±12.9         | 69.3±9.8                         | <0.001   | 62.1±12.8         | 59.8±12.4        | 70.2±11.3                       | <0.001   |
| Male (n (%))                                        | 284 (71.7)        | 202 (76.5)        | 82 (62.1)                        | 0.004    | 352 (76.7)        | 294 (79.9)       | 58 (63.7)                       | 0.001    |
| BMI (kg/m <sup>2</sup> )                            | 25.8 (24.6, 26.1) | 26.0 (25.3, 26.5) | 24.9 (24.4, 25.5)                | <0.001   | 25.4 (23.4, 27.3) | 25.5±3.0         | 25.3 (23.4, 27.5)               | 0.047    |
| Cardiac arrest (n (%))                              | 10 (2.5)          | 6 (2.3)           | 4 (3.0)                          | 0.91     | 8 (1.7)           | 6 (1.6)          | 2 (2.2)                         | 0.711    |
| Cardiogenic shock before admission (n (%))          | 34 (8.6)          | 6 (2.3)           | 28 (21.2)                        | <0.001   | 30 (6.5)          | 15 (4.1)         | 15 (16.5)                       | <0.001   |
| Use of temporary pacemaker before admission (n (%)) | 3 (0.7)           | 0                 | 3 (2.3)                          | 0.065    | 4 (0.9)           | 2 (0.5)          | 2 (2.2)                         | 0.128    |
| Ventilator support before admission (n (%))         | 6 (1.5)           | 1 (0.4)           | 5 (3.8)                          | 0.029    | 7 (1.5)           | 2 (0.5)          | 5 (5.5)                         | 0.001    |
| CPR before admission                                | 12 (3.0)          | 5 (1.9)           | 7 (5.3)                          | 0.12     | 5 (1.1)           | 0                | 5 (5.5)                         | <0.001   |

|    |                                 |                |                |                |        |                |                |                |        |
|----|---------------------------------|----------------|----------------|----------------|--------|----------------|----------------|----------------|--------|
| 1  |                                 |                |                |                |        |                |                |                |        |
| 2  |                                 |                |                |                |        |                |                |                |        |
| 3  |                                 |                |                |                |        |                |                |                |        |
| 4  |                                 |                |                |                |        |                |                |                |        |
| 5  | <b>(n (%))</b>                  |                |                |                |        |                |                |                |        |
| 6  |                                 |                |                |                |        |                |                |                |        |
| 7  | SBP on admission                |                |                |                |        |                |                |                |        |
| 8  |                                 | 128 (110, 146) | 133 (114, 149) | 118 (100, 140) | <0.001 | 125 (110, 140) | 129±25         | 121 (107, 135) | 0.009  |
| 9  | <b>(median (IQR))</b>           |                |                |                |        |                |                |                |        |
| 10 |                                 |                |                |                |        |                |                |                |        |
| 11 | DBP on admission                |                |                |                |        |                |                |                |        |
| 12 |                                 | 79 (69, 89)    | 82 (72, 92)    | 73 (62, 82)    | <0.001 | 77±16          | 80±15          | 69±16          | <0.001 |
| 13 | <b>(median (IQR))</b>           |                |                |                |        |                |                |                |        |
| 14 |                                 |                |                |                |        |                |                |                |        |
| 15 | Heart rate on admission         |                |                |                |        |                |                |                |        |
| 16 |                                 | 77 (65, 90)    | 76 (64, 89)    | 80 (66, 96)    | 0.025  | 79±18          | 78±17          | 82±24          | 0.095  |
| 17 | <b>(median (IQR))</b>           |                |                |                |        |                |                |                |        |
| 18 |                                 |                |                |                |        |                |                |                |        |
| 19 | Fatal arrhythmia before         |                |                |                |        |                |                |                |        |
| 20 | admission <b>(n (%))</b>        | 21 (5.3)       | 15 (5.7)       | 6 (4.5)        | 0.812  | 20 (4.4)       | 12 (3.3)       | 8 (8.8)        | 0.021  |
| 21 |                                 |                |                |                |        |                |                |                |        |
| 22 |                                 |                |                |                |        |                |                |                |        |
| 23 | Total ischemic time             |                |                |                |        |                |                |                |        |
| 24 |                                 | 217 (124, 367) | 154 (95, 250)  | 360 (194, 420) | <0.001 | 211 (130, 341) | 194 (125, 307) | 300 (222, 480) | <0.001 |
| 25 | <b>(min (median (IQR)))</b>     |                |                |                |        |                |                |                |        |
| 26 |                                 |                |                |                |        |                |                |                |        |
| 27 | Killip class 3-4 <b>(n (%))</b> | 132 (33.3)     | 95 (36.0)      | 37 (28.0)      | 0.142  | 119 (25.9)     | 66 (17.9)      | 53 (58.2)      | <0.001 |
| 28 |                                 |                |                |                |        |                |                |                |        |
| 29 |                                 |                |                |                |        |                |                |                |        |
| 30 | Past medical history            |                |                |                |        |                |                |                |        |
| 31 |                                 |                |                |                |        |                |                |                |        |
| 32 |                                 |                |                |                |        |                |                |                |        |
| 33 | <i>Hypertension (n (%))</i>     | 211 (53.3)     | 137 (51.9)     | 74 (56.1)      | 0.499  | 73 (15.9)      | 38 (10.3)      | 35 (38.5)      | <0.001 |
| 34 |                                 |                |                |                |        |                |                |                |        |
| 35 | <i>DM (n (%))</i>               | 96 (24.2)      | 49 (18.6)      | 47 (35.6)      | <0.001 | 104 (22.7)     | 84 (22.8)      | 20 (22.0)      | 0.863  |
| 36 |                                 |                |                |                |        |                |                |                |        |
| 37 | <i>Hyperlipidemia (n (%))</i>   | 39 (9.8)       | 12 (4.5)       | 27 (20.5)      | <0.001 | 41 (8.9)       | 23 (6.3)       | 18 (19.8)      | <0.001 |
| 38 |                                 |                |                |                |        |                |                |                |        |
| 39 |                                 |                |                |                |        |                |                |                |        |
| 40 |                                 |                |                |                |        |                |                |                |        |
| 41 |                                 |                |                |                |        |                |                |                |        |
| 42 |                                 |                |                |                |        |                |                |                |        |
| 43 |                                 |                |                |                |        |                |                |                |        |
| 44 |                                 |                |                |                |        |                |                |                |        |
| 45 |                                 |                |                |                |        |                |                |                |        |
| 46 |                                 |                |                |                |        |                |                |                |        |
| 47 |                                 |                |                |                |        |                |                |                |        |

|    |                                           |            |            |           |        |            |            |           |        |
|----|-------------------------------------------|------------|------------|-----------|--------|------------|------------|-----------|--------|
| 1  |                                           |            |            |           |        |            |            |           |        |
| 2  |                                           |            |            |           |        |            |            |           |        |
| 3  |                                           |            |            |           |        |            |            |           |        |
| 4  |                                           |            |            |           |        |            |            |           |        |
| 5  | <i>Previous PCI (n (%))</i>               | 18 (4.5)   | 8 (3.0)    | 10 (7.6)  | 0.073  | 23 (5.0)   | 17 (4.6)   | 6 (6.6)   | 0.44   |
| 6  |                                           |            |            |           |        |            |            |           |        |
| 7  | <i>Previous CABG (n (%))</i>              | 1 (0.2)    | 0          | 1 (0.8)   | 0.157  | 1 (0.2)    | 0          | 1 (1.1)   | 0.05   |
| 8  |                                           |            |            |           |        |            |            |           |        |
| 9  |                                           |            |            |           |        |            |            |           |        |
| 10 | <i>CAD (n (%))</i>                        | 45 (11.4)  | 17 (6.4)   | 28 (21.2) | <0.001 | 40 (8.7)   | 20 (5.4)   | 20 (22.0) | <0.001 |
| 11 |                                           |            |            |           |        |            |            |           |        |
| 12 | <i>AF (n (%))</i>                         | 11 (2.8)   | 1 (0.4)    | 10 (7.6)  | <0.001 | 13 (2.8)   | 3 (0.8)    | 10 (11.0) | <0.001 |
| 13 |                                           |            |            |           |        |            |            |           |        |
| 14 | <i>HF (n (%))</i>                         | 4 (1.0)    | 3 (1.1)    | 1 (0.8)   | 0.722  | 25 (5.4)   | 18 (4.9)   | 7 (7.7)   | 0.292  |
| 15 |                                           |            |            |           |        |            |            |           |        |
| 16 | <i>Renal insufficiency (n (%))</i>        | 62 (15.7)  | 1 (0.4)    | 61 (46.2) | <0.001 | 13 (2.8)   | 1 (0.3)    | 12 (13.2) | <0.001 |
| 17 |                                           |            |            |           |        |            |            |           |        |
| 18 | <i>History of cerebrovascular disease</i> |            |            |           |        |            |            |           |        |
| 19 | <i>(n (%))</i>                            | 64 (16.2)  | 40 (15.2)  | 24 (18.2) | 0.53   | 72 (15.7)  | 60 (16.3)  | 12 (13.2) | 0.464  |
| 20 |                                           |            |            |           |        |            |            |           |        |
| 21 |                                           |            |            |           |        |            |            |           |        |
| 22 | <i>Peripheral vascular disease (n</i>     |            |            |           |        |            |            |           |        |
| 23 | <i>(%))</i>                               | 9 (2.3)    | 5 (1.9)    | 4 (3.0)   | 0.721  | 5 (1.1)    | 3 (0.8)    | 2 (2.2)   | 0.255  |
| 24 |                                           |            |            |           |        |            |            |           |        |
| 25 |                                           |            |            |           |        |            |            |           |        |
| 26 | <i>History of bleeding (n (%))</i>        | 2 (0.5)    | 1 (0.4)    | 1 (0.8)   | >0.999 | 7 (1.5)    | 6 (1.6)    | 1 (1.1)   | 0.711  |
| 27 |                                           |            |            |           |        |            |            |           |        |
| 28 | <i>Family history of CAD (n (%))</i>      | 44 (11.1)  | 28 (10.6)  | 16 (11.1) | 0.875  | 68 (14.8)  | 62 (16.8)  | 6 (6.6)   | 0.014  |
| 29 |                                           |            |            |           |        |            |            |           |        |
| 30 |                                           |            |            |           |        |            |            |           |        |
| 31 | Angiographic characteristics              |            |            |           |        |            |            |           |        |
| 32 |                                           |            |            |           |        |            |            |           |        |
| 33 | <i>Number of stents (median (IQR))</i>    | 1 (1, 1)   | 1 (1, 1)   | 1 (0, 1)  | <0.001 | 1 (1, 1)   | 1 (1, 1)   | 1 (1, 1)  | 0.137  |
| 34 |                                           |            |            |           |        |            |            |           |        |
| 35 | <i>Long lesions (n (%))</i>               | 245 (61.9) | 178 (67.4) | 67 (50.8) | 0.002  | 194 (42.3) | 131 (35.6) | 63 (69.2) | <0.001 |
| 36 |                                           |            |            |           |        |            |            |           |        |
| 37 | <i>Thrombus aspiration (n (%))</i>        | 123 (31.1) | 92 (34.8)  | 31 (23.5) | 0.029  | 221 (48.1) | 205 (55.7) | 16 (17.6) | <0.001 |
| 38 |                                           |            |            |           |        |            |            |           |        |
| 39 |                                           |            |            |           |        |            |            |           |        |
| 40 |                                           |            |            |           |        |            |            |           |        |
| 41 |                                           |            |            |           |        |            |            |           |        |
| 42 |                                           |            |            |           |        |            |            |           |        |
| 43 |                                           |            |            |           |        |            |            |           |        |
| 44 |                                           |            |            |           |        |            |            |           |        |
| 45 |                                           |            |            |           |        |            |            |           |        |
| 46 |                                           |            |            |           |        |            |            |           |        |
| 47 |                                           |            |            |           |        |            |            |           |        |



|    |                                        |            |            |           |        |            |            |           |        |
|----|----------------------------------------|------------|------------|-----------|--------|------------|------------|-----------|--------|
| 1  |                                        |            |            |           |        |            |            |           |        |
| 2  |                                        |            |            |           |        |            |            |           |        |
| 3  |                                        |            |            |           |        |            |            |           |        |
| 4  |                                        |            |            |           |        |            |            |           |        |
| 5  | <i>Residual stenosis (n (%))</i>       | 12 (3.0)   | 2 (0.8)    | 10 (7.6)  | 0.001  | 10 (2.2)   | 4 (1.1)    | 6 (6.6)   | 0.001  |
| 6  |                                        |            |            |           |        |            |            |           |        |
| 7  | <i>Use temporary pacemaker (n (%))</i> | 22 (5.6)   | 4 (1.5)    | 18 (13.6) | <0.001 | 9 (2.0)    | 2 (0.5)    | 7 (7.7)   | <0.001 |
| 8  |                                        |            |            |           |        |            |            |           |        |
| 9  | <i>IABP (n (%))</i>                    | 19 (4.8)   | 4 (1.5)    | 15 (11.4) | <0.001 | 15 (3.3)   | 4 (1.1)    | 11 (12.1) | <0.001 |
| 10 |                                        |            |            |           |        |            |            |           |        |
| 11 | <i>Respirator support (n (%))</i>      | 20 (5.1)   | 1 (0.4)    | 19 (14.4) | <0.001 | 13 (2.8)   | 2 (0.5)    | 11 (12.1) | <0.001 |
| 12 |                                        |            |            |           |        |            |            |           |        |
| 13 | <i>Pericardial aspiration (n (%))</i>  | 3 (0.8)    | 0          | 3 (2.3)   | 0.065  | 3 (0.7)    | 0          | 3 (3.3)   | <0.001 |
| 14 |                                        |            |            |           |        |            |            |           |        |
| 15 | <i>No flow (n (%))</i>                 | 98 (24.7)  | 48 (18.2)  | 50 (37.9) | <0.001 | 84 (18.3)  | 55 (14.9)  | 29 (31.9) | <0.001 |
| 16 |                                        |            |            |           |        |            |            |           |        |
| 17 | <i>Coronary perforation (n (%))</i>    | 5 (1.3)    | 0          | 5 (3.8)   | 0.001  | 2 (0.4)    | 1 (0.3)    | 1 (1.1)   | 0.283  |
| 18 |                                        |            |            |           |        |            |            |           |        |
| 19 | <i>Dissection (n (%))</i>              | 3 (0.8)    | 0          | 3 (2.3)   | 0.065  | 5 (1.1)    | 0          | 5 (5.5)   | <0.001 |
| 20 |                                        |            |            |           |        |            |            |           |        |
| 21 | <i>Pericardial tamponade (n (%))</i>   | 9 (2.3)    | 0          | 9 (6.8)   | <0.001 | 2 (0.4)    | 0          | 2 (2.2)   | 0.004  |
| 22 |                                        |            |            |           |        |            |            |           |        |
| 23 | <i>Acute HF (n (%))</i>                | 55 (13.9)  | 22 (8.3)   | 33 (25.0) | <0.001 | 52 (11.3)  | 30 (7.7)   | 22 (24.2) | <0.001 |
| 24 |                                        |            |            |           |        |            |            |           |        |
| 25 | <i>Bleeding (n (%))</i>                | 2 (0.5)    | 0          | 2 (1.5)   | 0.21   | 6 (1.3)    | 3 (0.8)    | 3 (3.3)   | 0.062  |
| 26 |                                        |            |            |           |        |            |            |           |        |
| 27 | <i>Cardiac arrest (n (%))</i>          | 24 (6.1)   | 1 (0.4)    | 23 (17.4) | <0.001 | 14 (3.1)   | 6 (1.6)    | 8 (8.8)   | <0.001 |
| 28 |                                        |            |            |           |        |            |            |           |        |
| 29 | <i>Recurrent MI (n (%))</i>            | 16 (4.0)   | 1 (0.4)    | 15 (11.4) | <0.001 | 7 (1.5)    | 2 (0.5)    | 5 (5.5)   | 0.001  |
| 30 |                                        |            |            |           |        |            |            |           |        |
| 31 | <i>Stent thrombosis (n (%))</i>        | 8 (2.0)    | 6 (2.3)    | 2 (1.5)   | 0.9    | 14 (3.1)   | 13 (3.5)   | 1 (1.1)   | 0.227  |
| 32 |                                        |            |            |           |        |            |            |           |        |
| 33 | <i>Type B2-C (n (%))</i>               | 309 (78.0) | 213 (80.7) | 96 (72.7) | 0.094  | 277 (60.3) | 230 (62.5) | 47 (51.6) | 0.058  |
| 34 |                                        |            |            |           |        |            |            |           |        |
| 35 |                                        |            |            |           |        |            |            |           |        |
| 36 |                                        |            |            |           |        |            |            |           |        |
| 37 |                                        |            |            |           |        |            |            |           |        |
| 38 |                                        |            |            |           |        |            |            |           |        |
| 39 |                                        |            |            |           |        |            |            |           |        |
| 40 |                                        |            |            |           |        |            |            |           |        |
| 41 |                                        |            |            |           |        |            |            |           |        |
| 42 |                                        |            |            |           |        |            |            |           |        |
| 43 |                                        |            |            |           |        |            |            |           |        |
| 44 |                                        |            |            |           |        |            |            |           |        |
| 45 |                                        |            |            |           |        |            |            |           |        |
| 46 |                                        |            |            |           |        |            |            |           |        |
| 47 |                                        |            |            |           |        |            |            |           |        |

|    |                                         |                    |                   |                    |        |                   |                   |                   |        |
|----|-----------------------------------------|--------------------|-------------------|--------------------|--------|-------------------|-------------------|-------------------|--------|
| 1  |                                         |                    |                   |                    |        |                   |                   |                   |        |
| 2  |                                         |                    |                   |                    |        |                   |                   |                   |        |
| 3  |                                         |                    |                   |                    |        |                   |                   |                   |        |
| 4  |                                         |                    |                   |                    |        |                   |                   |                   |        |
| 5  | <i>TIMI flow grade 0-1 before PCI</i>   |                    |                   |                    |        |                   |                   |                   |        |
| 6  |                                         | 311 (78.5)         | 197 (74.6)        | 114 (86.4)         | 0.011  | 339 (73.9)        | 274 (74.5)        | 65 (71.4)         | 0.556  |
| 7  | <b>(n (%))</b>                          |                    |                   |                    |        |                   |                   |                   |        |
| 8  |                                         |                    |                   |                    |        |                   |                   |                   |        |
| 9  | <i>Use of GP IIb/IIIa inhibitors (n</i> |                    |                   |                    |        |                   |                   |                   |        |
| 10 | <i>(%))</i>                             | 92 (23.2)          | 54 (20.5)         | 38 (28.8)          | 0.064  | 107 (23.3)        | 80 (21.7)         | 27 (29.7)         | 0.109  |
| 11 |                                         |                    |                   |                    |        |                   |                   |                   |        |
| 12 |                                         |                    |                   |                    |        |                   |                   |                   |        |
| 13 | <i>multivessel CAD (n (%))</i>          | 316 (79.8)         | 207 (78.4)        | 109 (82.6)         | 0.33   | 373 (81.3)        | 296 (80.4)        | 77 (84.6)         | 0.36   |
| 14 |                                         |                    |                   |                    |        |                   |                   |                   |        |
| 15 | <i>LAD (n (%))</i>                      | 149 (37.6)         | 85 (32.2)         | 64 (48.5)          | 0.002  | 209 (45.5)        | 177 (48.1)        | 32 (35.2)         | 0.027  |
| 16 |                                         |                    |                   |                    |        |                   |                   |                   |        |
| 17 | <i>LCX (n (%))</i>                      | 59 (14.9)          | 39 (14.8)         | 20 (15.2)          | 0.921  | 64 (13.9)         | 46 (12.5)         | 18 (19.8)         | 0.072  |
| 18 |                                         |                    |                   |                    |        |                   |                   |                   |        |
| 19 | <i>RCA (n (%))</i>                      | 101 (25.5)         | 101 (38.3)        | 40 (30.3)          | 0.119  | 144 (31.4)        | 120 (32.6)        | 24 (26.4)         | 0.251  |
| 20 |                                         |                    |                   |                    |        |                   |                   |                   |        |
| 21 | Biochemical markers                     |                    |                   |                    |        |                   |                   |                   |        |
| 22 |                                         |                    |                   |                    |        |                   |                   |                   |        |
| 23 |                                         |                    |                   |                    |        |                   |                   |                   |        |
| 24 | <i>Hyperkalemia (n (%))</i>             | 36 (9.1)           | 3 (1.1)           | 33 (25.0)          | <0.001 | 30 (6.5)          | 11 (3.0)          | 19 (20.9)         | <0.001 |
| 25 |                                         |                    |                   |                    |        |                   |                   |                   |        |
| 26 | <i>Hyponatremia (n (%))</i>             | 29 (7.3)           | 12 (4.5)          | 19 (14.4)          | 0.001  | 37 (8.1)          | 31 (8.4)          | 6 (6.6)           | 0.566  |
| 27 |                                         |                    |                   |                    |        |                   |                   |                   |        |
| 28 |                                         |                    |                   |                    |        |                   |                   |                   |        |
| 29 | <i>Anemia (n (%))</i>                   | 26 (6.6)           | 12 (4.5)          | 14 (10.6)          | 0.022  | 40 (8.7)          | 21 (5.7)          | 19 (20.9)         | <0.001 |
| 30 |                                         |                    |                   |                    |        |                   |                   |                   |        |
| 31 | <i>Creatinine (median (IQR))</i>        | 86.2 (76.9, 90.6)  | 86.2 (70.6, 86.2) | 90.6 (77.0, 95.5)  | 0.111  | 92.5 (64.5, 93.0) | 85.1±32.1         | 91.1±53.5         | 0.17   |
| 32 |                                         |                    |                   |                    |        |                   |                   |                   |        |
| 33 | <i>N/L ratio (median (IQR))</i>         | 5.47 (2.82, 10.00) | 4.70 (2.68, 7.87) | 8.54 (3.19, 11.46) | <0.001 | 6.15 (3.48, 9.52) | 5.08 (3.65, 9.46) | 9.1 (3.81, 12.51) | <0.001 |
| 34 |                                         |                    |                   |                    |        |                   |                   |                   |        |
| 35 |                                         |                    |                   |                    |        |                   |                   |                   |        |
| 36 | <i>HCT, % (median (IQR))</i>            | 41.0 (37.1, 44.0)  | 41.8 (38.0, 44.6) | 38.5 (36.8, 41.3)  | <0.001 | 40.4 (37.4, 44.5) | 40.0±5.2          | 38.0 (32.7, 43.3) | <0.001 |
| 37 |                                         |                    |                   |                    |        |                   |                   |                   |        |
| 38 |                                         |                    |                   |                    |        |                   |                   |                   |        |
| 39 |                                         |                    |                   |                    |        |                   |                   |                   |        |
| 40 |                                         |                    |                   |                    |        |                   |                   |                   |        |
| 41 |                                         |                    |                   |                    |        |                   |                   |                   |        |
| 42 |                                         |                    |                   |                    |        |                   |                   |                   |        |
| 43 |                                         |                    |                   |                    |        |                   |                   |                   |        |
| 44 |                                         |                    |                   |                    |        |                   |                   |                   |        |
| 45 |                                         |                    |                   |                    |        |                   |                   |                   |        |
| 46 |                                         |                    |                   |                    |        |                   |                   |                   |        |
| 47 |                                         |                    |                   |                    |        |                   |                   |                   |        |

|                              |                                                                 |                      |                      |                      |        |                      |                      |                      |        |
|------------------------------|-----------------------------------------------------------------|----------------------|----------------------|----------------------|--------|----------------------|----------------------|----------------------|--------|
|                              | <i>HGB, g/L (median (IQR))</i>                                  | 137.0 (126.0, 269.0) | 142.0 (129.0, 155.0) | 129.0 (119.0, 137.3) | <0.001 | 137.2±19.8           | 138.5±19.1           | 131.9±21.5           | 0.004  |
|                              | <i>PLT, ×10<sup>9</sup>/L (median (IQR))</i>                    | 221.0 (183.5, 269.0) | 224.0 (186.0, 269.0) | 227.0 (194.8, 246.3) | 0.554  | 225.0 (184.0, 260.0) | 229.0 (187.0, 264.0) | 215.0 (175.0, 254.0) | 0.151  |
|                              | <i>Random blood glucose on admission, mmol/L (median (IQR))</i> | 6.84 (5.47, 9.92)    | 5.95 (5.02, 7.44)    | 9.81 (7.96, 11.04)   | <0.001 | 6.73 (5.27, 10.10)   | 6.12 (5.10, 8.10)    | 10.96 (8.40, 11.78)  | <0.001 |
|                              | <i>EF after PCI (median (IQR))</i>                              | 51.0 (43.0, 58.0)    | 54.0 (47.8, 59.0)    | 43.0 (38.0, 48.5)    | <0.001 | 55 (46, 60)          | 56 (51, 61)          | 45 (37, 53)          | <0.001 |
| Medication list on admission |                                                                 |                      |                      |                      |        |                      |                      |                      |        |
|                              | <i>(n (%))</i>                                                  |                      |                      |                      |        |                      |                      |                      |        |
|                              | <i>Aspirin</i>                                                  | 379 (95.7)           | 262 (99.2)           | 117 (88.6)           | <0.001 | 404 (88.0)           | 332 (90.2)           | 72 (79.1)            | 0.004  |
|                              | <i>Ticagrelor/clopidogrel</i>                                   | 393 (99.2)           | 262 (99.2)           | 131 (99.2)           | >0.999 | 418 (91.1)           | 332 (90.2)           | 86 (94.5)            | 0.199  |
|                              | <i>Ticagrelor</i>                                               | 223 (56.3)           | 162 (61.4)           | 61 (46.2)            |        | 218 (47.5)           | 183 (49.7)           | 35 (38.5)            |        |
|                              | <i>clopidogrel</i>                                              | 170 (42.9)           | 100 (37.9)           | 70 (53.0)            |        | 200 (43.6)           | 149 (40.5)           | 51 (56.0)            |        |
|                              | <i>ACEI/ARB</i>                                                 | 133 (33.6)           | 100 (37.9)           | 33 (25.0)            | 0.014  | 25 (5.4)             | 18 (4.9)             | 7 (7.7)              | 0.292  |
|                              | <i>β-Blocker</i>                                                | 92 (23.2)            | 66 (25.0)            | 26 (19.7)            | 0.239  | 37 (8.1)             | 29 (7.9)             | 8 (8.9)              | 0.753  |

|                                                  |               |            |            |           |        |            |            |           |        |
|--------------------------------------------------|---------------|------------|------------|-----------|--------|------------|------------|-----------|--------|
|                                                  | <i>Statin</i> | 188 (47.5) | 130 (49.2) | 58 (43.9) | 0.319  | 206 (44.9) | 181 (49.2) | 25 (27.5) | <0.001 |
| mean duration of hospital stay<br>(median (IQR)) |               | 8.51±5.11  | 9 (9,11)   | 1 (1,4)   | <0.001 | 8.32±4.70  | 9 (8,11)   | 2 (1,5)   | <0.001 |

- 
- 1 BMI: body mass index; SBP: systolic blood pressure; DBP: diastolic blood pressure; DM: diabetes mellitus; PCI: percutaneous
  - 2 coronary intervention; CABG: coronary artery bypass graft; CAD: coronary atherosclerotic heart disease; AF: atrial fibrillation; HF:
  - 3 heart failure; IABP: intra-aortic balloon pump; MI: myocardial infarction; LAD: left anterior descending branch; LCX: left circumflex
  - 4 artery; RCA: right coronary artery; N/L ratio: neutrophils/lymphocytes ratio; HCT: hematocrit; HGB: hemoglobin; PLT: platelets; EF:
  - 5 ejection fraction; ACEI: angiotensin-converting enzyme inhibitor; ARB: angiotensin receptor blocker.

**Table 2 Variables selected as predictors for the nomogram according to the multivariable logistic analysis**

| Variables                         | Univariate analysis |           |        | Multivariate analysis |            |        |
|-----------------------------------|---------------------|-----------|--------|-----------------------|------------|--------|
|                                   | OR                  | 95% CI    | P      | OR                    | 95% CI     | P      |
| Age                               | 1.07                | 1.05-1.09 | <0.001 | 1.07                  | 1.05-1.09  | 0.049  |
| BMI                               | 0.79                | 0.70-0.87 | <0.001 | 0.55                  | 0.31-0.87  | 0.019  |
| SBP on admission                  | 0.98                | 0.97-0.99 | <0.001 | 0.92                  | 0.86-0.97  | 0.009  |
| HGB                               | 0.97                | 0.95-0.98 | <0.001 | 0.85                  | 0.73-0.97  | 0.017  |
| Random blood glucose on admission | 1.38                | 1.27-1.51 | <0.001 | 1.53                  | 1.13-2.21  | 0.011  |
| EF after PCI                      | 0.91                | 0.88-0.93 | <0.001 | 0.89                  | 0.80-0.97  | 0.015  |
| Use aspirin before admission      | 0.06                | 0.01-0.22 | <0.001 | 0.01                  | 0.009-0.04 | 0.001  |
| N/L ratio                         | 1.08                | 1.04-1.12 | <0.001 | 1.34                  | 1.12-1.69  | 0.004  |
| Long lesions                      | 0.50                | 0.32-0.76 | 0.001  | 2.00                  | 1.31-3.08  | <0.001 |
| TIMI flow grade 0-1 before PCI    | 2.15                | 1.24-3.90 | <0.001 | 2.15                  | 1.24-3.90  | 0.008  |

OR: odds ratio; CI: confidence interval; BMI: body mass index; SBP: systolic blood pressure; HGB: hemoglobin; EF: ejection fraction;

PCI: percutaneous coronary intervention; N/L ratio: neutrophils/lymphocytes ratio; TIMI: thrombolysis in myocardial infarction

For peer review only



Figure 1. Flowchart illustrating the process of patient selection.

170x177mm (300 x 300 DPI)

1  
2  
3  
4  
5  
6  
7  
8  
9  
10  
11  
12  
13  
14  
15  
16  
17  
18  
19  
20  
21  
22  
23  
24  
25  
26  
27  
28  
29  
30  
31  
32  
33  
34  
35  
36  
37  
38  
39  
40  
41  
42  
43  
44  
45  
46  
47  
48  
49  
50  
51  
52  
53  
54  
55  
56  
57  
58  
59  
60



Figure 2. The nomogram for the prediction of in-hospital mortality in patients with acute ST-elevation myocardial infarction after primary PCI. BMI: body mass index; SBP: systolic blood pressure; HGB: hemoglobin; EF: ejection fraction; N/L ratio: neutrophils/lymphocytes ratio.

170x242mm (300 x 300 DPI)



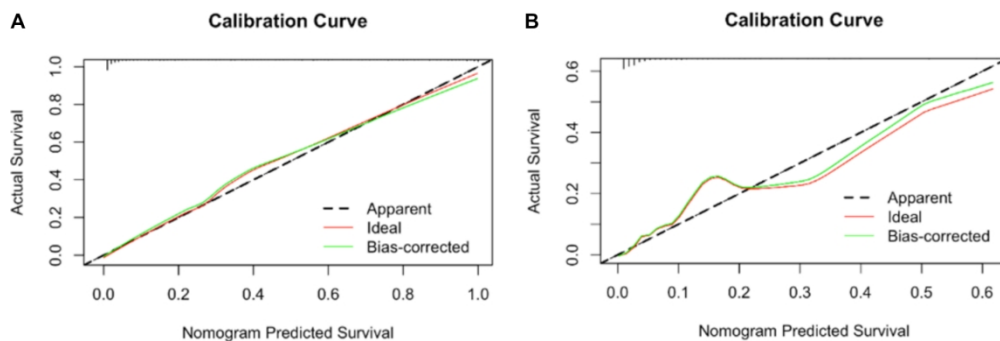

Figure 3. The calibration curves of the nomogram for the training set (A) and the testing set (B).

170x56mm (300 x 300 DPI)

1  
2  
3  
4  
5  
6  
7  
8  
9  
10  
11  
12  
13  
14  
15  
16  
17  
18  
19  
20  
21  
22  
23  
24  
25  
26  
27  
28  
29  
30  
31  
32  
33  
34  
35  
36  
37  
38  
39  
40  
41  
42  
43  
44  
45  
46  
47  
48  
49  
50  
51  
52  
53  
54  
55  
56  
57  
58  
59  
60



Figure 4. The received operating characteristics (ROC) curves of the nomogram for the training set (A) and the testing set (B).

170x61mm (300 x 300 DPI)



Figure 5. The decision curve analysis (DCA) for the risk model for the training set (A) and the testing set (B).

170x48mm (300 x 300 DPI)

**STROBE 2007 (v4) checklist of items to be included in reports of observational studies in epidemiology\***  
**Checklist for cohort, case-control, and cross-sectional studies (combined)**

| Section/Topic             | Item # | Recommendation                                                                                                                                                                                                                                                                                                                                                                                                                                                         | Reported on page # |
|---------------------------|--------|------------------------------------------------------------------------------------------------------------------------------------------------------------------------------------------------------------------------------------------------------------------------------------------------------------------------------------------------------------------------------------------------------------------------------------------------------------------------|--------------------|
| Title and abstract        | 1      | (a) Indicate the study’s design with a commonly used term in the title or the abstract                                                                                                                                                                                                                                                                                                                                                                                 | 1                  |
|                           |        | (b) Provide in the abstract an informative and balanced summary of what was done and what was found                                                                                                                                                                                                                                                                                                                                                                    |                    |
| <b>Introduction</b>       |        |                                                                                                                                                                                                                                                                                                                                                                                                                                                                        |                    |
| Background/rationale      | 2      | Explain the scientific background and rationale for the investigation being reported                                                                                                                                                                                                                                                                                                                                                                                   | 4                  |
| Objectives                | 3      | State specific objectives, including any pre-specified hypotheses                                                                                                                                                                                                                                                                                                                                                                                                      | 5                  |
| <b>Methods</b>            |        |                                                                                                                                                                                                                                                                                                                                                                                                                                                                        |                    |
| Study design              | 4      | Present key elements of study design early in the paper                                                                                                                                                                                                                                                                                                                                                                                                                | 6                  |
| Setting                   | 5      | Describe the setting, locations, and relevant dates, including periods of recruitment, exposure, follow-up, and data collection                                                                                                                                                                                                                                                                                                                                        | 6                  |
| Participants              | 6      | (a) <i>Cohort study</i> —Give the eligibility criteria, and the sources and methods of selection of participants. Describe methods of follow-up<br><i>Case-control study</i> —Give the eligibility criteria, and the sources and methods of case ascertainment and control selection. Give the rationale for the choice of cases and controls<br><i>Cross-sectional study</i> —Give the eligibility criteria, and the sources and methods of selection of participants | 6                  |
|                           |        | (b) <i>Cohort study</i> —For matched studies, give matching criteria and number of exposed and unexposed<br><i>Case-control study</i> —For matched studies, give matching criteria and the number of controls per case                                                                                                                                                                                                                                                 |                    |
| Variables                 | 7      | Clearly define all outcomes, exposures, predictors, potential confounders, and effect modifiers. Give diagnostic criteria, if applicable                                                                                                                                                                                                                                                                                                                               | 6                  |
| Data sources/ measurement | 8*     | For each variable of interest, give sources of data and details of methods of assessment (measurement). Describe comparability of assessment methods if there is more than one group                                                                                                                                                                                                                                                                                   | 7                  |
| Bias                      | 9      | Describe any efforts to address potential sources of bias                                                                                                                                                                                                                                                                                                                                                                                                              | 7                  |
| Study size                | 10     | Explain how the study size was arrived at                                                                                                                                                                                                                                                                                                                                                                                                                              | 7                  |
| Quantitative variables    | 11     | Explain how quantitative variables were handled in the analyses. If applicable, describe which groupings were chosen and why                                                                                                                                                                                                                                                                                                                                           | 7                  |
| Statistical methods       | 12     | (a) Describe all statistical methods, including those used to control for confounding                                                                                                                                                                                                                                                                                                                                                                                  | 7                  |
|                           |        | (b) Describe any methods used to examine subgroups and interactions                                                                                                                                                                                                                                                                                                                                                                                                    |                    |
|                           |        | (c) Explain how missing data were addressed                                                                                                                                                                                                                                                                                                                                                                                                                            |                    |
|                           |        | (d) <i>Cohort study</i> —If applicable, explain how loss to follow-up was addressed<br><i>Case-control study</i> —If applicable, explain how matching of cases and controls was addressed                                                                                                                                                                                                                                                                              |                    |

1  
2  
3  
4  
5  
6  
7  
8  
9  
10  
11  
12  
13  
14  
15  
16  
17  
18  
19  
20  
21  
22  
23  
24  
25  
26  
27  
28  
29  
30  
31  
32  
33  
34  
35  
36  
37  
38  
39  
40  
41  
42  
43  
44  
45  
46

|                          |     |                                                                                                                                                                                                                                                                                                                                                                                                               |    |
|--------------------------|-----|---------------------------------------------------------------------------------------------------------------------------------------------------------------------------------------------------------------------------------------------------------------------------------------------------------------------------------------------------------------------------------------------------------------|----|
|                          |     | <i>Cross-sectional study</i> —If applicable, describe analytical methods taking account of sampling strategy                                                                                                                                                                                                                                                                                                  |    |
|                          |     | (e) Describe any sensitivity analyses                                                                                                                                                                                                                                                                                                                                                                         |    |
| <b>Results</b>           |     |                                                                                                                                                                                                                                                                                                                                                                                                               |    |
| Participants             | 13* | (a) Report numbers of individuals at each stage of study—eg numbers potentially eligible, examined for eligibility, confirmed eligible, included in the study, completing follow-up, and analysed<br>(b) Give reasons for non-participation at each stage<br>(c) Consider use of a flow diagram                                                                                                               | 9  |
| Descriptive data         | 14* | (a) Give characteristics of study participants (eg demographic, clinical, social) and information on exposures and potential confounders<br>(b) Indicate number of participants with missing data for each variable of interest<br>(c) <i>Cohort study</i> —Summarise follow-up time (eg, average and total amount)                                                                                           | 9  |
| Outcome data             | 15* | <i>Cohort study</i> —Report numbers of outcome events or summary measures over time<br><i>Case-control study</i> —Report numbers in each exposure category, or summary measures of exposure<br><i>Cross-sectional study</i> —Report numbers of outcome events or summary measures                                                                                                                             | 9  |
| Main results             | 16  | (a) Give unadjusted estimates and, if applicable, confounder-adjusted estimates and their precision (eg, 95% confidence interval). Make clear which confounders were adjusted for and why they were included<br>(b) Report category boundaries when continuous variables were categorized<br>(c) If relevant, consider translating estimates of relative risk into absolute risk for a meaningful time period | 9  |
| Other analyses           | 17  | Report other analyses done—eg analyses of subgroups and interactions, and sensitivity analyses                                                                                                                                                                                                                                                                                                                | 10 |
| <b>Discussion</b>        |     |                                                                                                                                                                                                                                                                                                                                                                                                               |    |
| Key results              | 18  | Summarise key results with reference to study objectives                                                                                                                                                                                                                                                                                                                                                      | 11 |
| Limitations              | 19  | Discuss limitations of the study, taking into account sources of potential bias or imprecision. Discuss both direction and magnitude of any potential bias                                                                                                                                                                                                                                                    | 15 |
| Interpretation           | 20  | Give a cautious overall interpretation of results considering objectives, limitations, multiplicity of analyses, results from similar studies, and other relevant evidence                                                                                                                                                                                                                                    | 15 |
| Generalisability         | 21  | Discuss the generalisability (external validity) of the study results                                                                                                                                                                                                                                                                                                                                         | 15 |
| <b>Other information</b> |     |                                                                                                                                                                                                                                                                                                                                                                                                               |    |
| Funding                  | 22  | Give the source of funding and the role of the funders for the present study and, if applicable, for the original study on which the present article is based                                                                                                                                                                                                                                                 | 16 |

\*Give information separately for cases and controls in case-control studies and, if applicable, for exposed and unexposed groups in cohort and cross-sectional studies.

**Note:** An Explanation and Elaboration article discusses each checklist item and gives methodological background and published examples of transparent reporting. The STROBE checklist is best used in conjunction with this article (freely available on the Web sites of PLoS Medicine at <http://www.plosmedicine.org/>, Annals of Internal Medicine at <http://www.annals.org/>, and Epidemiology at <http://www.epidem.com/>). Information on the STROBE Initiative is available at [www.strobe-statement.org](http://www.strobe-statement.org).

## TRIPOD Checklist: Prediction Model Development and Validation

| Section/Topic                | Item | Checklist Item | Page                                                                                                                                                                                                  |    |
|------------------------------|------|----------------|-------------------------------------------------------------------------------------------------------------------------------------------------------------------------------------------------------|----|
| <b>Title and abstract</b>    |      |                |                                                                                                                                                                                                       |    |
| Title                        | 1    | D;V            | Identify the study as developing and/or validating a multivariable prediction model, the target population, and the outcome to be predicted.                                                          | 1  |
| Abstract                     | 2    | D;V            | Provide a summary of objectives, study design, setting, participants, sample size, predictors, outcome, statistical analysis, results, and conclusions.                                               | 2  |
| <b>Introduction</b>          |      |                |                                                                                                                                                                                                       |    |
| Background and objectives    | 3a   | D;V            | Explain the medical context (including whether diagnostic or prognostic) and rationale for developing or validating the multivariable prediction model, including references to existing models.      | 4  |
|                              | 3b   | D;V            | Specify the objectives, including whether the study describes the development or validation of the model or both.                                                                                     | 5  |
| <b>Methods</b>               |      |                |                                                                                                                                                                                                       |    |
| Source of data               | 4a   | D;V            | Describe the study design or source of data (e.g., randomized trial, cohort, or registry data), separately for the development and validation data sets, if applicable.                               | 6  |
|                              | 4b   | D;V            | Specify the key study dates, including start of accrual; end of accrual; and, if applicable, end of follow-up.                                                                                        | 6  |
| Participants                 | 5a   | D;V            | Specify key elements of the study setting (e.g., primary care, secondary care, general population) including number and location of centres.                                                          | 6  |
|                              | 5b   | D;V            | Describe eligibility criteria for participants.                                                                                                                                                       | 6  |
|                              | 5c   | D;V            | Give details of treatments received, if relevant.                                                                                                                                                     | 6  |
| Outcome                      | 6a   | D;V            | Clearly define the outcome that is predicted by the prediction model, including how and when assessed.                                                                                                | 7  |
|                              | 6b   | D;V            | Report any actions to blind assessment of the outcome to be predicted.                                                                                                                                | NA |
| Predictors                   | 7a   | D;V            | Clearly define all predictors used in developing or validating the multivariable prediction model, including how and when they were measured.                                                         | 7  |
|                              | 7b   | D;V            | Report any actions to blind assessment of predictors for the outcome and other predictors.                                                                                                            | NA |
| Sample size                  | 8    | D;V            | Explain how the study size was arrived at.                                                                                                                                                            | NA |
| Missing data                 | 9    | D;V            | Describe how missing data were handled (e.g., complete-case analysis, single imputation, multiple imputation) with details of any imputation method.                                                  | NA |
| Statistical analysis methods | 10a  | D              | Describe how predictors were handled in the analyses.                                                                                                                                                 | 9  |
|                              | 10b  | D              | Specify type of model, all model-building procedures (including any predictor selection), and method for internal validation.                                                                         | 9  |
|                              | 10c  | V              | For validation, describe how the predictions were calculated.                                                                                                                                         | 9  |
|                              | 10d  | D;V            | Specify all measures used to assess model performance and, if relevant, to compare multiple models.                                                                                                   | 9  |
|                              | 10e  | V              | Describe any model updating (e.g., recalibration) arising from the validation, if done.                                                                                                               | 9  |
| Risk groups                  | 11   | D;V            | Provide details on how risk groups were created, if done.                                                                                                                                             | 9  |
| Development vs. validation   | 12   | V              | For validation, identify any differences from the development data in setting, eligibility criteria, outcome, and predictors.                                                                         | 9  |
| <b>Results</b>               |      |                |                                                                                                                                                                                                       |    |
| Participants                 | 13a  | D;V            | Describe the flow of participants through the study, including the number of participants with and without the outcome and, if applicable, a summary of the follow-up time. A diagram may be helpful. | 10 |
|                              | 13b  | D;V            | Describe the characteristics of the participants (basic demographics, clinical features, available predictors), including the number of participants with missing data for predictors and outcome.    | 10 |
|                              | 13c  | V              | For validation, show a comparison with the development data of the distribution of important variables (demographics, predictors and outcome).                                                        | 11 |
| Model development            | 14a  | D              | Specify the number of participants and outcome events in each analysis.                                                                                                                               | 11 |
|                              | 14b  | D              | If done, report the unadjusted association between each candidate predictor and outcome.                                                                                                              | NA |
| Model specification          | 15a  | D              | Present the full prediction model to allow predictions for individuals (i.e., all regression coefficients, and model intercept or baseline survival at a given time point).                           | 12 |
|                              | 15b  | D              | Explain how to use the prediction model.                                                                                                                                                              | 12 |
| Model performance            | 16   | D;V            | Report performance measures (with CIs) for the prediction model.                                                                                                                                      | 11 |
| Model-updating               | 17   | V              | If done, report the results from any model updating (i.e., model specification, model performance).                                                                                                   | NA |
| <b>Discussion</b>            |      |                |                                                                                                                                                                                                       |    |
| Limitations                  | 18   | D;V            | Discuss any limitations of the study (such as nonrepresentative sample, few events per predictor, missing data).                                                                                      | 17 |
| Interpretation               | 19a  | V              | For validation, discuss the results with reference to performance in the development data, and any other validation data.                                                                             | 13 |
|                              | 19b  | D;V            | Give an overall interpretation of the results, considering objectives, limitations, results from similar studies, and other relevant evidence.                                                        | 13 |
| Implications                 | 20   | D;V            | Discuss the potential clinical use of the model and implications for future research.                                                                                                                 | 16 |
| <b>Other information</b>     |      |                |                                                                                                                                                                                                       |    |
| Supplementary information    | 21   | D;V            | Provide information about the availability of supplementary resources, such as study protocol, Web calculator, and data sets.                                                                         | NA |
| Funding                      | 22   | D;V            | Give the source of funding and the role of the funders for the present study.                                                                                                                         | 19 |

\*Items relevant only to the development of a prediction model are denoted by D, items relating solely to a validation of a prediction model are denoted by V, and items relating to both are denoted D;V. We recommend using the TRIPOD Checklist in conjunction with the TRIPOD Explanation and Elaboration document.

# BMJ Open

**Development of a nomogram for the prediction of in-hospital mortality in patients with acute ST-elevation myocardial infarction after primary percutaneous coronary intervention: a multicentre, retrospective, observational study in Hebei Province, China**

|                                 |                                                                                                                                                                                                                                                                                                                                                                                                                                                                                                                                                                                                                                                                                                                    |
|---------------------------------|--------------------------------------------------------------------------------------------------------------------------------------------------------------------------------------------------------------------------------------------------------------------------------------------------------------------------------------------------------------------------------------------------------------------------------------------------------------------------------------------------------------------------------------------------------------------------------------------------------------------------------------------------------------------------------------------------------------------|
| Journal:                        | <i>BMJ Open</i>                                                                                                                                                                                                                                                                                                                                                                                                                                                                                                                                                                                                                                                                                                    |
| Manuscript ID                   | bmjopen-2021-056101.R2                                                                                                                                                                                                                                                                                                                                                                                                                                                                                                                                                                                                                                                                                             |
| Article Type:                   | Original research                                                                                                                                                                                                                                                                                                                                                                                                                                                                                                                                                                                                                                                                                                  |
| Date Submitted by the Author:   | 18-Jan-2022                                                                                                                                                                                                                                                                                                                                                                                                                                                                                                                                                                                                                                                                                                        |
| Complete List of Authors:       | Wang, Yudan; Hebei Medical University, School of Graduate; Hebei General Hospital, Department of Cardiology Center<br>Wang, Wenjing; Hebei General Hospital, Department of Cardiology Center<br>Jia, Shengqi; Hebei Medical University, School of Graduate<br>Gao, Man; Hebei Medical University, School of Graduate<br>Zheng, Shihang; Hebei North University, School of Graduate<br>Wang, Jiaqi; Hebei North University, School of Graduate<br>Dang, Yi; Hebei General Hospital, Department of Cardiology Center<br>Li, Yingxiao; Hebei General Hospital, Department of Cardiology Center<br>Qi, Xiaoyong; Hebei Medical University, School of Graduate; Hebei General Hospital, Department of Cardiology Center |
| <b>Primary Subject Heading</b>: | Cardiovascular medicine                                                                                                                                                                                                                                                                                                                                                                                                                                                                                                                                                                                                                                                                                            |
| Secondary Subject Heading:      | Cardiovascular medicine                                                                                                                                                                                                                                                                                                                                                                                                                                                                                                                                                                                                                                                                                            |
| Keywords:                       | Coronary intervention < CARDIOLOGY, Coronary heart disease < CARDIOLOGY, Myocardial infarction < CARDIOLOGY                                                                                                                                                                                                                                                                                                                                                                                                                                                                                                                                                                                                        |
|                                 |                                                                                                                                                                                                                                                                                                                                                                                                                                                                                                                                                                                                                                                                                                                    |

SCHOLARONE™  
Manuscripts



I, the Submitting Author has the right to grant and does grant on behalf of all authors of the Work (as defined in the below author licence), an exclusive licence and/or a non-exclusive licence for contributions from authors who are: i) UK Crown employees; ii) where BMJ has agreed a CC-BY licence shall apply, and/or iii) in accordance with the terms applicable for US Federal Government officers or employees acting as part of their official duties; on a worldwide, perpetual, irrevocable, royalty-free basis to BMJ Publishing Group Ltd ("BMJ") its licensees and where the relevant Journal is co-owned by BMJ to the co-owners of the Journal, to publish the Work in this journal and any other BMJ products and to exploit all rights, as set out in our [licence](#).

The Submitting Author accepts and understands that any supply made under these terms is made by BMJ to the Submitting Author unless you are acting as an employee on behalf of your employer or a postgraduate student of an affiliated institution which is paying any applicable article publishing charge ("APC") for Open Access articles. Where the Submitting Author wishes to make the Work available on an Open Access basis (and intends to pay the relevant APC), the terms of reuse of such Open Access shall be governed by a Creative Commons licence – details of these licences and which [Creative Commons](#) licence will apply to this Work are set out in our licence referred to above.

Other than as permitted in any relevant BMJ Author's Self Archiving Policies, I confirm this Work has not been accepted for publication elsewhere, is not being considered for publication elsewhere and does not duplicate material already published. I confirm all authors consent to publication of this Work and authorise the granting of this licence.



1 **Development of a nomogram for the prediction of in-hospital mortality in patients**  
2 **with acute ST-elevation myocardial infarction after primary percutaneous coronary**  
3 **intervention: a multicentre, retrospective, observational study in Hebei Province,**  
4 **China**

5  
6 **Running title:** Nomogram for STEMI in-hospital mortality after PCI

7  
8 **Yudan Wang<sup>1,2</sup>, Wenjing Wang<sup>2</sup>, Shengqi Jia<sup>1</sup>, Man Gao<sup>1</sup>, Shihang Zheng<sup>3</sup>, Jiaqi**  
9 **Wang<sup>3</sup>, Yi Dang<sup>2</sup>, Yingxiao Li<sup>2</sup>, Xiaoyong Qi<sup>1,2\*</sup>**

10 <sup>1</sup>School of Graduate, Hebei Medical University, Shijiazhuang, Hebei Province, People's  
11 Republic of China

12 <sup>2</sup>Department of Cardiology Center, Hebei General Hospital, Shijiazhuang, Hebei  
13 Province, People's Republic of China

14 <sup>3</sup>School of Graduate, Hebei North University, Zhangjiakou, Hebei Province, People's  
15 Republic of China

16  
17 **\*Corresponding Author**

18 Xiaoyong Qi

19 School of Graduate, Hebei Medical University, Shijiazhuang, Hebei Province, People's  
20 Republic of China

21 Department of Cardiology Center, Hebei General Hospital, No. 348, Heping West Road,  
22 Shijiazhuang 050051, Hebei Province, People's Republic of China

23 E-mail address: hbghqxy@126.com

1  
2  
3  
4  
5  
6  
7  
8  
9  
10  
11  
12  
13  
14  
15  
16  
17  
18  
19  
20  
21  
22  
23  
24  
25  
26  
27  
28  
29  
30  
31  
32  
33  
34  
35  
36  
37  
38  
39  
40  
41  
42  
43  
44  
45  
46  
47  
48  
49  
50  
51  
52  
53  
54  
55  
56  
57  
58  
59  
60

1 **Word count: 2996**

For peer review only

1  
2  
3 1 **ABSTRACT**  
4

5 2 **Objectives:** To establish a clinical prognostic nomogram for predicting in-hospital  
6 3 mortality after primary percutaneous coronary intervention (PCI) among patients with  
7 4 ST-elevation myocardial infarction (STEMI).  
8 5

9 6 **Design:** Retrospective, multicenter, observational study.  
10 7

11 8 **Setting:** Thirty-nine hospitals in Hebei Province.  
12 9

13 10 **Participants:** Patients with STEMI who underwent PCI from January 2018 to December  
14 11 2019.  
15 12

16 13 **Interventions:** A multivariable logistic regression model was used to identify the factors  
17 14 associated with in-hospital mortality, and a nomogram was established using these  
18 15 factors. The performance of the nomogram was evaluated by the discrimination,  
19 16 calibration, and clinical usefulness.  
20 17

21 18 **Primary and secondary outcome measures:** The outcome was the factors associated  
22 19 with in-hospital mortality.  
23 20

24 21 **Results:** This study included 855 patients, among whom 223 died in hospital. Age, Body  
25 22 Mass Index (BMI), systolic pressure on admission, hemoglobin, random blood glucose  
26 23 on admission, ejection fraction after PCI, use aspirin before admission, long lesions,  
27 24 thrombolysis in myocardial infarction (TIMI) flow grade, and neutrophils/lymphocytes  
28 25 ratio (N/L ratio) were independently associated with in-hospital mortality (all  $P < 0.05$ ). In  
29 26 the training set, the nomogram showed a C-index of 0.947, goodness-of-fit of 0.683, and  
30 27 area under the receiver operating characteristic curve (AUC) of 0.947 (95%CI=0.927-  
31 28 0.967). In the testing set, the C-index was 0.891, goodness-of-fit was 0.462, and AUC  
32 29 was 0.891 (95%CI=0.844-0.939). The results indicate that the nomogram had good  
33 30  
34 31  
35 32  
36 33  
37 34  
38 35  
39 36  
40 37  
41 38  
42 39  
43 40  
44 41  
45 42  
46 43  
47 44  
48 45  
49 46  
50 47  
51 48  
52 49  
53 50  
54 51  
55 52  
56 53  
57 54  
58 55  
59 56  
60 57

1 discrimination and good prediction accuracy and could achieve a good net benefit.

2 **Conclusions:** A nomogram to predict in-hospital mortality in patients with STEMI after  
3 PCI was developed and validated in Hebei, China and showed a satisfactory performance.  
4 Prospective studies will be necessary to confirm the performance and clinical  
5 applicability and practicality of the nomogram.

6  
7 **Keywords:** nomogram; ST-elevated myocardial infarction; percutaneous coronary  
8 intervention; in-hospital mortality

9  
10 **Strengths and limitations of this study**

- 11 - This is a multi-center study, included 39 tertiary centers and 855 patients, including  
12 223 (26.1%) patients who died in the hospital.
- 13 - The data were obtained retrospectively, and some patients died during the PCI, which  
14 may have led to some missing information.
- 15 - Prospective studies will be necessary to confirm the performance and clinical  
16 applicability and practicality of the nomogram.

## 1 INTRODUCTION

2 ST-segment elevation myocardial infarction (STEMI), a type of coronary artery disease  
3 (CAD), is a common clinical emergency and critical illness <sup>1</sup>. STEMI is most often  
4 caused by plaque rupture of an atherosclerotic lesion in the affected (culprit) coronary  
5 artery followed by total occlusion of the vessel lumen with a thrombus <sup>2 3</sup>. Common risk  
6 factors for STEMI are tobacco abuse, dyslipidemias, hypertension, diabetes mellitus, and  
7 a family history of CAD <sup>4</sup>. In recent years, with well-established diagnosis and treatment  
8 guidelines, continuous standardization of the treatment of STEMI, increasing evidence of  
9 determinants of patient prognosis and development of emerging technologies, there has  
10 been a considerable reduction in STEMI mortality; still, mortality seems to have  
11 plateaued <sup>3</sup>.

12 Primary percutaneous coronary intervention (PCI) has become the preferred reperfusion  
13 strategy in patients with STEMI according to the current clinical guidelines for STEMI in  
14 the United States and Europe <sup>5 6</sup>. Nevertheless, even if such patients receive timely PCI  
15 and/or appropriate antiplatelet drugs, the prognosis is still unsatisfying, and a substantial  
16 number of STEMI patients still die in-hospital after PCI (about 6%) <sup>3 7 8</sup>. Therefore, there  
17 is still room for improving the short-term outcomes of these patients on top of a timely  
18 PCI.

19 Various studies examined the risk factors of short and long-term mortality of STEMI  
20 patients after PCI <sup>9-11</sup>. Guidelines encourage the use of clinical scores such as the  
21 thrombolysis in myocardial infarction (TIMI) or The Global Registry of Acute Coronary  
22 Events (GRACE) for STEMI to assess early and long-term risk <sup>5 6 12</sup>. Several biomarkers  
23 have been reported to confer independent prognostic information after STEMI, including

1  
2  
3 1 Cardiac Troponin (cTn), Brain Natriuretic Peptide (BNP), amino-terminal pro-Brain  
4  
5 2 Natriuretic Peptide (NT-proBNP), and D-dimer<sup>13-16</sup>. Unfortunately, these studies often  
6  
7 3 exclude patients with advanced age, liver or kidney dysfunction, and other comorbidities  
8  
9 4 and complications. The generalizability of those studies is limited, and it is difficult to  
10  
11 5 summarize and reflect the real-world treatment situation comprehensively.  
12  
13 6 Therefore, the objective of this study was to develop a clinical nomogram for predicting  
14  
15 7 in-hospital mortality of patients with STEMI after PCI. The results could provide clinical  
16  
17 8 guidance and improve the outcome of STEMI patients.  
18  
19  
20  
21  
22  
23  
24  
25  
26  
27  
28  
29  
30  
31  
32  
33  
34  
35  
36  
37  
38  
39  
40  
41  
42  
43  
44  
45  
46  
47  
48  
49  
50  
51  
52  
53  
54  
55  
56  
57  
58  
59  
60

## 1 PATIENTS AND METHODS

### 2 Study design and patients

3 This multicenter, retrospective, observational study included STEMI patients treated with  
4 PCI at 39 PCI hospitals in Hebei Province from January 2018 to December 2019. The  
5 cohort was divided into a training set and a time-independent validation set. The training  
6 set refers to the use of modeled data to verify the predictive effect of the model, while test  
7 set is to use another group of patients' data (namely external data) to verify the prediction  
8 accuracy of the model. The training set patients enrolled from January 2018 to December  
9 2018 and the testing set patients enrolled from January 2019 to December 2019.

10 All patients met the diagnostic criteria of acute STEMI based on their symptoms and/or  
11 ECG, myocardial damage markers and other test results and underwent primary PCI  
12 according to the 2017 ESC guidelines for the management of STEMI <sup>5</sup>, namely with  
13 persistent chest discomfort or other symptoms suggestive of ischemia and ST-segment  
14 elevation in at least two contiguous leads. Patients with non-ST segment myocardial  
15 infarction (NSTEMI) or unstable angina or STEMI patients who did not undergo PCI  
16 were excluded. Patients who were re-admitted to the hospital for revascularization of  
17 non-culprit vessel were also excluded. The treatment strategy after PCI of surviving  
18 patients is determined by the doctor in charge in accordance with relevant guidelines.  
19 The study was approved by the Ethics Committees of Hebei General Hospital as the lead  
20 center and the ethics committee of each participating hospital. The requirement for  
21 informed consent was waived by the committee. The study was conducted according to  
22 the tenets of the Declaration of Helsinki for Medical Research Involving Human Subjects  
23 and Good Clinical Practice.

1  
2  
3 1  
4  
5

## 6 **Patient and Public Involvement**

7 Patients or the public were not involved in the design or reporting or dissemination plans  
8 of our research as this study is a retrospective, observational study.  
9

## 10 **Definitions**

11 Long lesions was defined as the stenosis that has as  $\geq 50\%$  reduction and more than  
12 20mm in luminal diameter<sup>17</sup>.

13 Residual stenosis was defined as  $> 30\%$  residual stenosis of the target lesion after PCI.

14 Bleeding was defined as a composite of major bleeding according to Bleeding Academic  
15 Research Consortium Definition for Bleeding (BARC) type 3 or 5, but was not related to  
16 coronary-artery bypass grafting (CABG)<sup>18</sup>.

## 17 **Data collection**

18 Demographics (age, sex, and BMI), medical history (hypertension, diabetes mellitus,  
19 atrial fibrillation (AF), hyperlipidemia and family history of coronary artery disease  
20 (CAD), stroke, renal failure, and peripheral artery disease), angiographic characteristics  
21 and information of cardiac procedures (disease condition, TIMI flow grade, number of  
22 stents, use of intra-aortic balloon pump (IABP), use of temporary pacemaker, use of  
23 ventilator, and whether there was no-reflow, coronary perforation, and cardiac arrest),  
24 medications on admission (antiplatelet agents,  $\beta$ -blockers, nitrate, angiotensin-converting  
25 enzyme inhibitors (ACEI), angiotensin receptor blockers (ARB), and statin), biochemical  
26 markers (N/L ratio), hematocrit (HCT), hemoglobin (HGB), platelets (PLT), and random



1 blood glucose on admission), and left ventricular ejection fraction (LVEF) after PCI were  
2 extracted from the medical charts. All treatments were according to the current  
3 guidelines.

### 5 **Nomogram construction**

6 Demographics, medical history, vital signs before and after PCI, and auxiliary  
7 examinations were evaluated using univariable logistic regression. Variables with  $P < 0.05$   
8 in the univariable logistic analyses were included for multivariable logistic analysis and  
9 nomogram construction. Receiver operator characteristic (ROC) curve analysis was used  
10 to quantify the prediction performance of the nomogram. A calibration curve was used to  
11 evaluate the calibration of the nomogram, and its goodness of fit was assessed using the  
12 Hosmer-Lemeshow test. Finally, the clinical usefulness of the nomogram was assessed  
13 using a decision curve analysis (DCA).

### 15 **Statistical analysis**

16 Statistical analyses were performed using *R version 4.0.3* (R Foundation for Statistical  
17 Computing) with *RStudio* (version 1.3.959; RStudio, Auckland, New Zealand). R  
18 packages used in this study were *rms*, *reader*, *tableone*, *pROC*, *ResourceSelection*, and  
19 *rmda*. The predictive accuracy of the nomogram was measured using the C-statistic  
20 (Bootstrap method, 1000 times). Calibration was evaluated using the Hosmer-Lemeshow  
21 statistic. Categorical variables were presented as frequencies with percentages, normally  
22 distributed continuous variables as means  $\pm$  SD, and other data as medians with  
23 interquartile ranges (IQRs). Categorical variables were compared using the chi-square

1  
2  
3 1 test or Fisher's test if the expected cell count was  $<5$ . Student's t-test was used to  
4  
5 2 compare normally distributed continuous variables. Otherwise, the Mann-Whitney U-test  
6  
7 3 was used. The significance level was set at 0.05, and two-sided tests were used.  
8  
9  
10  
11  
12  
13  
14  
15  
16  
17  
18  
19  
20  
21  
22  
23  
24  
25  
26  
27  
28  
29  
30  
31  
32  
33  
34  
35  
36  
37  
38  
39  
40  
41  
42  
43  
44  
45  
46  
47  
48  
49  
50  
51  
52  
53  
54  
55  
56  
57  
58  
59  
60

For peer review only

## 1 RESULTS

### 2 Characteristics of the patients

3 The whole study population consisted of 855 patients diagnosed with STEMI and who  
4 underwent PCI, including 396 in the training set (132 (33.3%) dead patients and, 264  
5 (66.7%) survivors) and 459 (91 (19.8%) dead patients, 368 (80.2%) survivors) in the test  
6 set (Figure 1). The clinical characteristics, including demographic, medical history,  
7 angiographic characteristics, and information of cardiac procedures, medications, and  
8 biochemical markers, are summarized in *supplementary file*. The Clinical characteristics  
9 selected as predictors for the nomogram are summarized in Table 1. The patients who  
10 died in the hospital were older ( $69.8\pm 10.2$  vs.  $60.2\pm 12.6$  years,  $P<0.01$ ), more likely to be  
11 women (32.7% vs. 21.5%,  $P<0.01$ ), and more had complications like hypertension, AF,  
12 and hyperlipidemia. The hospital stay was  $8.51\pm 5.11$  days in the training set and  
13  $8.32\pm 4.70$  days in the test set.

### 15 Nomogram construction

16 According to the multivariable logistic analysis, 10 variables meet the threshold of  
17  $P<0.05$ . Age (OR=1.069, 95% CI=1.048-1.092,  $P=0.049$ ), BMI (OR=0.55, 95%  
18 CI=0.31-0.87,  $P=0.019$ ), SBP on admission (OR=0.92, 95% CI=0.86-0.97,  $P=0.009$ ),  
19 HGB (OR=0.85, 95% CI=0.73-0.97,  $P=0.017$ ), random blood glucose on admission  
20 (OR=1.53, 95% CI=1.13-2.21,  $P=0.011$ ), EF after PCI (OR=0.89, 95% CI=0.80-0.97,  
21  $P=0.015$ ), aspirin (OR=0.001, 95% CI=0.009-0.04,  $P=0.001$ ), N/L ratio (OR=1.34, 95%  
22 CI=1.12-1.69,  $P=0.004$ ), long lesions (OR=2.00, 95% CI=1.310-3.084,  $P<0.001$ ), and  
23 TIMI flow grade (OR=2.15, 95% CI=1.242-3.900,  $P=0.008$ ) were independently

1 associated with in-hospital mortality after PCI of STEMI (Table 2). The nomogram is  
2 shown in Figure 2. The formula for calculating the total point of the nomogram is showed  
3 below:

4  $Score=15.5628+0.0320\times age-0.2991\times BMI-0.0184\times SBP-0.0331\times HGB+0.3663\times random$   
5  $blood\ glucose\ on\ admission-0.1188\times LVEF\ after\ PCI-4.7705\times aspirin+0.0521\times N/L\ ratio-$   
6  $2.4688\times long\ lesions+5.1018\times TIMI\ flow\ grade.$

### 8 **Evaluation of the nomogram**

9 In the training set, the C-index was 0.947, indicating that the prediction model was  
10 valuable in clinical practice (Figure 3a). The value of goodness-of-fit was 0.683,  
11 indicating a good prediction accuracy. The ROC curve is shown in Figure 4a  
12 (AUC=0.947, 95% CI: 0.927-0.967). Figure 5a shows the DCA curve for the training set,  
13 indicating that the nomogram had a high overall net benefit in predicting in-hospital  
14 mortality after PCI treatment.

15 In the testing set, the C-index was 0.891. Figure 3b shows the calibration curve, and the  
16 value of goodness-of-fit was 0.462. The ROC curve is shown in Figure 4b (AUC=0.891,  
17 95% CI: 0.844-0.939). The DCA curve is shown in Figure 5b. The results of the testing  
18 set indicate that the nomogram had good discrimination and good prediction accuracy  
19 which could achieve a good net benefit.

## 1 DISCUSSION

2 In this study, a relatively accurate clinical nomogram was constructed, which  
3 demonstrated adequate discrimination and calibration power to provide an individualized  
4 estimation for the in-hospital mortality in STEMI patients after PCI. For the construction  
5 of the nomogram, 10 significant predictors were screened by multivariable logistic  
6 analysis.

7 In our study, age was an independent risk factor of STEMI patients, in accordance with  
8 other analyses of STEMI patients and underlining the high-risk profile of elderly patients,  
9 as they usually present with more risk factors and comorbidities than younger patients<sup>19</sup>  
10 <sup>20</sup>, such as the higher prevalence of renal insufficiency, lower LVEF. High mortality in  
11 the older patients might also result from end-organ dysfunction, competing risks might  
12 also offset the benefits from reperfusion, such that successful outcomes are more  
13 dependent on overall health issues. Therefore, for older patients, some authors have also  
14 questioned the benefit of reperfusion therapy<sup>21</sup>.

15 For previous view, obesity increases insulin resistance, worsens plasma lipid profiles, and  
16 increases arterial blood pressure, which has adverse effects on patients with CAD through  
17 the indirect effects of other risk factors (such as hypertension, impaired glucose tolerance,  
18 and hyperinsulinemia)<sup>22</sup>. Therefore, obese patients demonstrate greater adverse left  
19 ventricle (LV) remodeling and more impaired LV deformation after STEMI compared  
20 with those similar infarct characteristics but normal BMI<sup>23 24</sup>. Interestingly, some studies  
21 have shown the so-called “obesity paradox”, whereby obesity is related to better clinical  
22 outcomes<sup>22 25-27</sup>, consistent with the present study. Fukuoka *et al.*<sup>28</sup> reported that this  
23 phenomenon is only observed in elderly patients, not in younger patients, so the influence

1 of BMI on risk factors for death might vary with age. Nevertheless, obesity is currently  
2 recognized as a risk factor for the long-term prognosis of patients with CAD, and it is  
3 worth recommending maintaining BMI at a normal level <sup>28</sup>.

4 Acute stress has been shown to regulate the immune response of lymphocytes and reduce  
5 the number of peripheral blood lymphocytes. The smaller the value, the higher the body's  
6 stress level. Therefore, the N/L ratio, an index for systemic inflammatory status, usually  
7 increases after STEMI <sup>29-31</sup>. Pan *et al.* <sup>32</sup> demonstrated the independent association  
8 between increased N/L ratio and short-term mortality in STEMI patients after PCI. The  
9 predictive value of the N/L ratio may be based on the following reasons. Stimulated  
10 neutrophils release superoxide radicals, proteolytic enzymes, and arachidonic acid  
11 metabolites that increase the infarct size and lead to cardiac electrical instability by  
12 damaging endothelial cells, activating coagulation cascade, aggregation of leukocytic  
13 cells, and plugging the micro-arteries <sup>33</sup>. These actions will participate in the extension of  
14 the areas of myocardial infarction, impaired epicardial and microvascular perfusion, no-  
15 reflow/slow flow during PCI, decreased LVEF, and post-infarction death <sup>34-36</sup>.

16 The acute phase of STEMI leads to insulin resistance, glucose intolerance, and  
17 hyperglycemia. The elevated levels of cytokines, growth hormone, glucagon, and cortisol  
18 result in increased hepatic glucose production. Hepatic glycogenolysis is further  
19 enhanced by catecholamines that also inhibit glycogenesis and stimulate the release of  
20 free fatty acids (FFAs). High concentrations of FFAs will increase myocardial oxygen  
21 requirement, reduce myocardial activity and contractility, impair calcium homeostasis  
22 and increase the production of free radicals, leading to an increased risk of myocardial  
23 damage and arrhythmias <sup>37-40</sup>. Thus, acute hyperglycemia might contribute to a poor

1 outcome. Previous studies reported that higher admission glucose was strongly correlated  
2 with larger infarct size, lower LVEF, and increased mortality risk in patients with and  
3 without diabetes <sup>41 42</sup>. Exercise training, dietary modifications, and intervention in the  
4 hospital, such as tight glycemic control during early PCI or at least within 24 h after  
5 STEMI might reduce the mortality risk in such patients <sup>43 44</sup>.

6 Lower admission HGB was associated with higher in-hospital mortality when analyzed as  
7 a continuous variable (OR=0.966, 95%CI: 0.954-0.978). In the study from Shacham Y *et*  
8 *al.* <sup>45</sup>, they revealed the longer total ischemic time, namely an ongoing inflammatory  
9 process, the lower admission HGB levels. HGB levels and inflammation are closely  
10 related. In patients with STEMI, inflammation block occurs, that is, an abundance of  
11 hepcidin leads to poor uptake of iron from the gastrointestinal tract, iron sequestration in  
12 macrophages, little iron recycling to the erythron for red-cell production, and microcytic  
13 anemia, which can cause a lower HGB level <sup>46</sup>.

14 Because of the important role of platelets in thrombus formation, the present study  
15 showed that prior aspirin use could reduce in-hospital mortality of STEMI patients after  
16 PCI, as supported by earlier clinical trials <sup>47 48</sup>. Weidmann *et al.* <sup>48</sup> provided evidence  
17 suggesting that pre-existing treatment with aspirin favorably affected the clinical  
18 presentation, infarct size, and degree of inflammation of patients with STEMI. Yonetsu *et*  
19 *al.* <sup>49</sup> reported that aspirin inhibits platelet aggregation and therefore reduces the  
20 probability of an occluding clot on top of a ruptured plaque and, conversely, the  
21 occurrence of STEMI.

22 Previous studies indicated that lesion length is associated with long-term adverse events  
23 after PCI and is an important risk factor for restenosis and stent thrombosis <sup>50-52</sup>. A longer

1 lesion, with its greater plaque burden, is conceived to provide a major source of smooth  
2 muscle cells that will then proliferate to form neointima. Atherosclerotic plaques have  
3 often been found to demonstrate an increased expression of isoforms characteristic of  
4 activated smooth muscle cells that are not present in normal vasculature <sup>53</sup>. Still, there are  
5 few studies on lesion length and in-hospital mortality, and further studies are still  
6 necessary. Preprocedural reperfusion might have a prognostic value <sup>54</sup>. A strong  
7 relationship exists between preprocedural TIMI flow grade and infarct size and  
8 predischARGE LVEF <sup>55</sup>. SBP is a critical factor, and hypotension was associated with a  
9 decrease in survival <sup>56</sup>.

10 In our multivariate analysis, the higher Killip Class is not a predictor of in-hospital  
11 mortality in STEMI patients. However, in a recent work from Del Buono *et al.*<sup>57</sup>, it was  
12 proved that a higher Killip Class is an independent risk factor for MACE events and in-  
13 hospital mortality in patients with anterior myocardial infarction. This is the first study  
14 including only patients with STEMI in the anterior location and excluding patients with  
15 history of cardiovascular diseases in order to reduce the heterogeneity of the population  
16 enrolled. This may be one of the reasons for the inconsistency of the two studies.  
17 Nevertheless, Killip classification is a simple and convenient clinical tool that can quickly  
18 stratify the risk of ACS patients and is likely to become an independent predictor of long-  
19 term follow-up results again.

20 The nomogram is a simple and intuitive representation of the mathematical model <sup>58</sup>. In  
21 addition, to be of clinical usefulness in a routine setting, the nomogram must contain  
22 variables assessed in the routine clinical setting, which is the case with the nomogram



1 developed here. It can simplify the statistical prediction model to the numerical  
2 probability of disease recurrence or death. The identification and stratification of patients  
3 becomes a simple tool with many advantages. The most prominent advantage is that it  
4 can predict individualized risks based on patient and disease characteristics. Secondly, it  
5 is easy to use and can help doctors develop individualized treatment plans. However,  
6 although the current clinical use of nomograms has increased, there are limited data on  
7 patient satisfaction or quality of life after it assists in medical decision-making. In  
8 addition, although nomograms are widely used clinically, they are rarely evaluated  
9 prospectively to determine whether their use actually improves the prognosis of patients<sup>59</sup>  
10 <sup>60</sup>. Therefore, it remains to be explored how this risk model can be better applied to the  
11 clinic. The results indicate that the nomogram had good discrimination, well prediction  
12 accuracy and could achieve satisfactory net benefit. Another nomogram based on other  
13 variables (left main coronary artery disease, grading of thrombus, TIMI classification,  
14 slow flow, use of IABP, use of  $\beta$ -blocker, use of ACEI/ARB, symptom-to-door time,  
15 symptom-to-balloon time, syntax score, LVEF, and CK-MB peak) also showed a high  
16 AUC for in-hospital mortality of patients with STEMI after PCI <sup>61</sup>. Three main reasons  
17 fame justify the different predictors we found in our study: different research methods,  
18 the hospitals and time nodes that included patients are different and different statistical  
19 methods. Nevertheless, we are planning to combine the two parts of patients to get a more  
20 accurate risk model of in-hospital mortality.

1  
2  
3  
4 1 Some study limitations should be mentioned: 1. This study has limitations that are  
5  
6 2 inherent to retrospective observational studies. Many hospitals and doctors involved,  
7  
8  
9 3 which can lead to some missing information, such as liver enzymes, more information  
10  
11 4 regarding the PCI procedure and other inflammatory index; 2. As the ischemic time is  
12  
13  
14 5 shortened as much as possible, patients whose symptoms and/or ECG can be diagnosed  
15  
16 6 are directly treated with PCI. Therefore, other potential risk factors in our study, such as  
17  
18  
19 7 LVEF before PCI, could not be included in the analyses. And some patients died during  
20  
21 8 the PCI, resulting in the lack of postoperative treatment information. Further prospective  
22  
23 9 studies are still necessary to confirm the performance of the clinical applicability in future  
24  
25 10 investigations and verify the practicality in ICU.

26  
27  
28  
29  
30 11 In conclusion, a nomogram to predict in-hospital mortality in patients with STEMI after  
31  
32 12 PCI was developed and validated in Hebei, China. The nomogram showed a satisfactory  
33  
34 13 performance, with a C-index of 0.948. Thus, this nomogram might be a precisely  
35  
36 14 individualized predictive tool for prognosis. However, additional studies are needed to  
37  
38 15 confirm the performance and clinical applicability and practicality of the nomogram.  
39  
40  
41  
42  
43  
44  
45  
46  
47  
48  
49  
50  
51  
52  
53  
54  
55  
56  
57  
58  
59  
60

## 1 **Acknowledgements**

2 We acknowledge the members of the heart team at the participating centers for their  
3 efforts in collecting clinical data and ensuring the accuracy and completeness of the data.  
4 We thank the study participants and patient advisers for accepting to be part of the study  
5 for working tirelessly to make this work a reality.

## 7 **Funding**

8 None.

## 10 **Competing interests**

11 The authors of this work have nothing to disclose.

## 13 **Ethical standards disclosure**

14 The study was approved by the Ethics Committees of Hebei General Hospital as the lead  
15 center and the ethics committee of each participating hospital (No. 202144). The  
16 requirement for informed consent was waived by the committee. The study was  
17 conducted according to the tenets of the Declaration of Helsinki for Medical Research  
18 Involving Human Subjects and Good Clinical Practice.

## 20 **Authors' contribution**

21 Yudan Wang, Wenjing Wang, Man Gao and Shihang Zheng carried out the studies,  
22 participated in collecting data, and drafted the manuscript. Yudan Wang, Yi Dang and  
23 Xiaoyong Qi performed the statistical analysis and participated in its design. Shengqi Jia,

1  
2  
3  
4  
5  
6  
7  
8  
9  
10  
11  
12  
13  
14  
15  
16  
17  
18  
19  
20  
21  
22  
23  
24  
25  
26  
27  
28  
29  
30  
31  
32  
33  
34  
35  
36  
37  
38  
39  
40  
41  
42  
43  
44  
45  
46  
47  
48  
49  
50  
51  
52  
53  
54  
55  
56  
57  
58  
59  
60

1 Jiaqi Wang and Yingxiao Li helped to draft the manuscript. All authors read and  
2 approved the final manuscript.

3

4 **Data availability statement**

5 No additional data are available.

For peer review only

## 1 REFERENCES

- 1 1. O' Gara PT, Kushner FG, Ascheim DD, et al. 2013 ACCF/AHA guideline for the management  
2 of ST-elevation myocardial infarction: a report of the American College of  
3 Cardiology Foundation/American Heart Association Task Force on Practice  
4 Guidelines. *Circulation* 2013;127(4):e362-425. doi: 10.1161/CIR.0b013e3182742cf6.
- 5 2. Trost JC, Lange RA. Treatment of acute coronary syndrome: part 2: ST-segment elevation  
6 myocardial infarction. *Crit Care Med* 2012;40(6):1939-45. doi:  
7 10.1097/CCM.0b013e31824e18c2.
- 8 3. Vogel B, Claessen BE, Arnold SV, et al. ST-segment elevation myocardial infarction.  
9 *Nature reviews Disease primers* 2019;5(1):39. doi: 10.1038/s41572-019-0090-3.
- 10 4. Authors/Task Force M, Piepoli MF, Hoes AW, et al. 2016 European Guidelines on  
11 cardiovascular disease prevention in clinical practice: The Sixth Joint Task  
12 Force of the European Society of Cardiology and Other Societies on Cardiovascular  
13 Disease Prevention in Clinical Practice (constituted by representatives of 10  
14 societies and by invited experts): Developed with the special contribution of  
15 the European Association for Cardiovascular Prevention & Rehabilitation (EACPR).  
16 *Eur J Prev Cardiol* 2016;23(11):NP1-NP96. doi: 10.1177/2047487316653709.
- 17 5. Ibanez B, James S, Agewall S, et al. 2017 ESC Guidelines for the management of acute  
18 myocardial infarction in patients presenting with ST-segment elevation: The Task  
19 Force for the management of acute myocardial infarction in patients presenting  
20 with ST-segment elevation of the European Society of Cardiology (ESC). *European*  
21 *heart journal* 2018;39(2):119-77. doi: 10.1093/eurheartj/ehx393.
- 22 6. O' Gara PT, Kushner FG, Ascheim DD, et al. 2013 ACCF/AHA guideline for the management  
23 of ST-elevation myocardial infarction: a report of the American College of  
24 Cardiology Foundation/American Heart Association Task Force on Practice  
25 Guidelines. *Journal of the American College of Cardiology* 2013;61(4):e78-e140.  
26 doi: 10.1016/j.jacc.2012.11.019.
- 27 7. Li J, Li X, Wang Q, et al. ST-segment elevation myocardial infarction in China from  
28 2001 to 2011 (the China PEACE-Retrospective Acute Myocardial Infarction Study):  
29 a retrospective analysis of hospital data. *Lancet* 2015;385(9966):441-51. doi:  
30 10.1016/S0140-6736(14)60921-1.
- 31 8. Canto JG, Kiefe CI, Rogers WJ, et al. Number of coronary heart disease risk factors  
32 and mortality in patients with first myocardial infarction. *JAMA*  
33 2011;306(19):2120-7. doi: 10.1001/jama.2011.1654.
- 34 9. Cenko E, Yoon J, Kedev S, et al. Sex Differences in Outcomes After STEMI: Effect  
35 Modification by Treatment Strategy and Age. *JAMA internal medicine*  
36 2018;178(5):632-39. doi: 10.1001/jamainternmed.2018.0514.
- 37 10. Mehta SR, Wood DA, Storey RF, et al. Complete Revascularization with Multivessel  
38 PCI for Myocardial Infarction. *The New England journal of medicine*  
39 2019;381(15):1411-21. doi: 10.1056/NEJMoa1907775.
- 40

11. Scholz KH, Maier SKG, Maier LS, et al. Impact of treatment delay on mortality in ST-segment elevation myocardial infarction (STEMI) patients presenting with and without haemodynamic instability: results from the German prospective, multicentre FITT-STEMI trial. *European heart journal* 2018;39(13):1065-74. doi: 10.1093/eurheartj/ehy004.
12. Levine GN, Bates ER, Bittl JA, et al. 2016 ACC/AHA Guideline Focused Update on Duration of Dual Antiplatelet Therapy in Patients With Coronary Artery Disease: A Report of the American College of Cardiology/American Heart Association Task Force on Clinical Practice Guidelines: An Update of the 2011 ACCF/AHA/SCAI Guideline for Percutaneous Coronary Intervention, 2011 ACCF/AHA Guideline for Coronary Artery Bypass Graft Surgery, 2012 ACC/AHA/ACP/AATS/PCNA/SCAI/STS Guideline for the Diagnosis and Management of Patients With Stable Ischemic Heart Disease, 2013 ACCF/AHA Guideline for the Management of ST-Elevation Myocardial Infarction, 2014 AHA/ACC Guideline for the Management of Patients With Non-ST-Elevation Acute Coronary Syndromes, and 2014 ACC/AHA Guideline on Perioperative Cardiovascular Evaluation and Management of Patients Undergoing Noncardiac Surgery. *Circulation* 2016;134(10):e123-55. doi: 10.1161/cir.0000000000000404.
13. Ottani F, Galvani M, Nicolini FA, et al. Elevated cardiac troponin levels predict the risk of adverse outcome in patients with acute coronary syndromes. *American heart journal* 2000;140(6):917-27. doi: 10.1067/mhj.2000.111107.
14. Sun T, Wang L, Zhang Y. Prognostic value of B-type natriuretic peptide in patients with acute coronary syndromes. *Archives of medical research* 2006;37(4):502-5. doi: 10.1016/j.arcmed.2005.09.007.
15. Jaberg L, Toggweiler S, Puck M, et al. Prognostic value of N-terminal pro-B-type natriuretic peptide in patients with acute coronary syndromes undergoing left main percutaneous coronary intervention. *Circulation journal : official journal of the Japanese Circulation Society* 2011;75(11):2648-53. doi: 10.1253/circj.cj-11-0095.
16. Yu T, Jiao Y, Song J, et al. Hospital mortality in acute coronary syndrome: adjustment of GRACE score by D-dimer enables a more accurate prediction in a prospective cohort study. *BMC cardiovascular disorders* 2019;19(1):252. doi: 10.1186/s12872-019-1239-4.
17. Sianos G, Morel MA, Kappetein AP, et al. The SYNTAX Score: an angiographic tool grading the complexity of coronary artery disease. *EuroIntervention : journal of EuroPCR in collaboration with the Working Group on Interventional Cardiology of the European Society of Cardiology* 2005;1(2):219-27.
18. Mehran R, Rao SV, Bhatt DL, et al. Standardized bleeding definitions for cardiovascular clinical trials: a consensus report from the Bleeding Academic Research Consortium. *Circulation* 2011;123(23):2736-47. doi: 10.1161/circulationaha.110.009449.
19. Forman DE, Chen AY, Wiviott SD, et al. Comparison of outcomes in patients aged <75,

- 1  
2  
3  
4  
5  
6  
7  
8  
9  
10  
11  
12  
13  
14  
15  
16  
17  
18  
19  
20  
21  
22  
23  
24  
25  
26  
27  
28  
29  
30  
31  
32  
33  
34  
35  
36  
37  
38  
39  
40  
41  
42  
43  
44  
45  
46  
47  
48  
49  
50  
51  
52  
53  
54  
55  
56  
57  
58  
59  
60
- 1 75 to 84, and  $\geq$  85 years with ST-elevation myocardial infarction (from the  
2 ACTION Registry-GWTG). *The American journal of cardiology* 2010;106(10):1382-8.  
3 doi: 10.1016/j.amjcard.2010.07.008.
- 4 20. Rathod KS, Jones DA, Gallagher S, et al. Atypical risk factor profile and excellent  
5 long-term outcomes of young patients treated with primary percutaneous coronary  
6 intervention for ST-elevation myocardial infarction. *European heart journal Acute*  
7 *cardiovascular care* 2016;5(1):23-32. doi: 10.1177/2048872614567453.
- 8 21. Haller PM, Jäger B, Farhan S, et al. Impact of age on short- and long-term mortality  
9 of patients with ST-elevation myocardial infarction in the VIENNA STEMI network.  
10 *Wiener klinische Wochenschrift* 2018;130(5-6):172-81. doi: 10.1007/s00508-017-  
11 1250-7.
- 12 22. Lavie CJ, De Schutter A, Milani RV. Healthy obese versus unhealthy lean: the obesity  
13 paradox. *Nature reviews Endocrinology* 2015;11(1):55-62. doi:  
14 10.1038/nrendo.2014.165.
- 15 23. Payvar S, Kim S, Rao SV, et al. In-hospital outcomes of percutaneous coronary  
16 interventions in extremely obese and normal-weight patients: findings from the  
17 NCDR (National Cardiovascular Data Registry). *Journal of the American College of*  
18 *Cardiology* 2013;62(8):692-6. doi: 10.1016/j.jacc.2013.05.058.
- 19 24. Winzap P, Davies A, Klingenberg R, et al. Diabetes and baseline glucose are  
20 associated with inflammation, left ventricular function and short- and long-term  
21 outcome in acute coronary syndromes: role of the novel biomarker Cyr 61.  
22 *Cardiovascular diabetology* 2019;18(1):142. doi: 10.1186/s12933-019-0946-6.
- 23 25. Samanta R, Pouliopoulos J, Kumar S, et al. Influence of BMI on inducible ventricular  
24 tachycardia and mortality in patients with myocardial infarction and left  
25 ventricular dysfunction: The obesity paradox. *International journal of cardiology*  
26 2018;265:148-54. doi: 10.1016/j.ijcard.2018.03.055.
- 27 26. Lavie CJ, Milani RV, Ventura HO. Obesity and cardiovascular disease: risk factor,  
28 paradox, and impact of weight loss. *Journal of the American College of Cardiology*  
29 2009;53(21):1925-32. doi: 10.1016/j.jacc.2008.12.068.
- 30 27. Samanta R, Narayan A, Koor P, et al. Influence of BMI on Short and Long-Term  
31 Outcomes in Patients With STEMI and LV Dysfunction. *Heart, lung & circulation*  
32 2020;29(3):361-67. doi: 10.1016/j.hlc.2019.01.017.
- 33 28. Fukuoka S, Kurita T, Dohi K, et al. Untangling the obesity paradox in patients with  
34 acute myocardial infarction after primary percutaneous coronary intervention  
35 (detail analysis by age). *International journal of cardiology* 2019;289:12-18.  
36 doi: 10.1016/j.ijcard.2019.01.011.
- 37 29. Ayça B, Akın F, Celik O, et al. Neutrophil to Lymphocyte Ratio is Related to Stent  
38 Thrombosis and High Mortality in Patients With Acute Myocardial Infarction.  
39 *Angiology* 2015;66(6):545-52. doi: 10.1177/0003319714542997.
- 40 30. Machado GP, Araujo GN, Carpes CK, et al. Comparison of neutrophil-to-lymphocyte

- 1 ratio and mean platelet volume in the prediction of adverse events after primary  
2 percutaneous coronary intervention in patients with ST-elevation myocardial  
3 infarction. *Atherosclerosis* 2018;274:212-17. doi:  
4 10.1016/j.atherosclerosis.2018.05.022.
- 5 31. Arbel Y, Shacham Y, Ziv-Baran T, et al. Higher neutrophil/lymphocyte ratio is related  
6 to lower ejection fraction and higher long-term all-cause mortality in ST-  
7 elevation myocardial infarction patients. *The Canadian journal of cardiology*  
8 2014;30(10):1177-82. doi: 10.1016/j.cjca.2014.05.010.
- 9 32. Pan W, Zhao D, Zhang C, et al. Application of neutrophil/lymphocyte ratio in  
10 predicting coronary blood flow and mortality in patients with ST-elevation  
11 myocardial infarction undergoing percutaneous coronary intervention. *Journal of*  
12 *cardiology* 2015;66(1):9-14. doi: 10.1016/j.jjcc.2014.10.014.
- 13 33. Sen N, Afsar B, Ozcan F, et al. The neutrophil to lymphocyte ratio was associated  
14 with impaired myocardial perfusion and long term adverse outcome in patients with  
15 ST-elevated myocardial infarction undergoing primary coronary intervention.  
16 *Atherosclerosis* 2013;228(1):203-10. doi: 10.1016/j.atherosclerosis.2013.02.017.
- 17 34. Kaya MG, Akpek M, Lam YY, et al. Prognostic value of neutrophil/lymphocyte ratio in  
18 patients with ST-elevated myocardial infarction undergoing primary coronary  
19 intervention: a prospective, multicenter study. *International journal of*  
20 *cardiology* 2013;168(2):1154-9. doi: 10.1016/j.ijcard.2012.11.074.
- 21 35. Kirtane AJ, Bui A, Murphy SA, et al. Association of peripheral neutrophilia with  
22 adverse angiographic outcomes in ST-elevation myocardial infarction. *The American*  
23 *journal of cardiology* 2004;93(5):532-6. doi: 10.1016/j.amjcard.2003.11.013.
- 24 36. Sheridan FM, Cole PG, Ramage D. Leukocyte adhesion to the coronary microvasculature  
25 during ischemia and reperfusion in an in vivo canine model. *Circulation*  
26 1996;93(10):1784-7. doi: 10.1161/01.cir.93.10.1784.
- 27 37. Dandona P, Chaudhuri A, Ghanim H, et al. Insulin as an anti-inflammatory and  
28 antiatherogenic modulator. *Journal of the American College of Cardiology*  
29 2009;53(5 Suppl):S14-20. doi: 10.1016/j.jacc.2008.10.038.
- 30 38. Devos P, Chioléro R, Van den Berghe G, et al. Glucose, insulin and myocardial  
31 ischaemia. *Current opinion in clinical nutrition and metabolic care*  
32 2006;9(2):131-9. doi: 10.1097/01.mco.0000214572.97933.d1.
- 33 39. Young LH, Renfu Y, Russell R, et al. Low-flow ischemia leads to translocation of  
34 canine heart GLUT-4 and GLUT-1 glucose transporters to the sarcolemma in vivo.  
35 *Circulation* 1997;95(2):415-22. doi: 10.1161/01.cir.95.2.415.
- 36 40. Khani S, Tayek JA. Cortisol increases gluconeogenesis in humans: its role in the  
37 metabolic syndrome. *Clinical science (London, England : 1979)* 2001;101(6):739-  
38 47. doi: 10.1042/cs1010739.
- 39 41. Timmer JR, van der Horst IC, Ottervanger JP, et al. Prognostic value of admission  
40 glucose in non-diabetic patients with myocardial infarction. *American heart*  
41 *journal* 2004;148(3):399-404. doi: 10.1016/j.ahj.2004.04.007.



- 1  
2  
3  
4  
5  
6  
7  
8  
9  
10  
11  
12  
13  
14  
15  
16  
17  
18  
19  
20  
21  
22  
23  
24  
25  
26  
27  
28  
29  
30  
31  
32  
33  
34  
35  
36  
37  
38  
39  
40  
41  
42  
43  
44  
45  
46  
47  
48  
49  
50  
51  
52  
53  
54  
55  
56  
57  
58  
59  
60
- 1 42. Planer D, Witzenbichler B, Guagliumi G, et al. Impact of hyperglycemia in patients  
2 with ST-segment elevation myocardial infarction undergoing percutaneous coronary  
3 intervention: the HORIZONS-AMI trial. *International journal of cardiology*  
4 2013;167(6):2572-9. doi: 10.1016/j.ijcard.2012.06.054.
- 5 43. Buchanan TA, Xiang AH, Peters RK, et al. Preservation of pancreatic beta-cell  
6 function and prevention of type 2 diabetes by pharmacological treatment of insulin  
7 resistance in high-risk hispanic women. *Diabetes* 2002;51(9):2796-803. doi:  
8 10.2337/diabetes.51.9.2796.
- 9 44. Marfella R, Sasso FC, Siniscalchi M, et al. Peri-procedural tight glyceic control  
10 during early percutaneous coronary intervention is associated with a lower rate  
11 of in-stent restenosis in patients with acute ST-elevation myocardial infarction.  
12 *The Journal of clinical endocrinology and metabolism* 2012;97(8):2862-71. doi:  
13 10.1210/jc.2012-1364.
- 14 45. Shacham Y, Leshem-Rubinow E, Ben-Assa E, et al. Lower admission hemoglobin levels  
15 are associated with longer symptom duration in acute ST-elevation myocardial  
16 infarction. *Clinical cardiology* 2014;37(2):73-7. doi: 10.1002/clc.22215.
- 17 46. Keel SB, Abkowitz JL. The microcytic red cell and the anemia of inflammation. *The*  
18 *New England journal of medicine* 2009;361(19):1904-6. doi: 10.1056/NEJMcibr0906391.
- 19 47. Brener SJ, Mehran R, Lansky AJ, et al. Pretreatment with aspirin in acute coronary  
20 syndromes: Lessons from the ACUITY and HORIZONS-AMI trials. *European heart*  
21 *journal Acute cardiovascular care* 2016;5(5):449-54. doi:  
22 10.1177/2048872615624848.
- 23 48. Weidmann L, Obeid S, Mach F, et al. Pre-existing treatment with aspirin or statins  
24 influences clinical presentation, infarct size and inflammation in patients with  
25 de novo acute coronary syndromes. *International journal of cardiology*  
26 2019;275:171-78. doi: 10.1016/j.ijcard.2018.10.050.
- 27 49. Yonetsu T, Lee T, Murai T, et al. Association Between Prior Aspirin Use and  
28 Morphological Features of Culprit Lesions at First Presentation of Acute Coronary  
29 Syndrome Assessed by Optical Coherence Tomography. *Circulation journal : official*  
30 *journal of the Japanese Circulation Society* 2017;81(4):511-19. doi:  
31 10.1253/circj.CJ-16-0957.
- 32 50. Claessen BE, Smits PC, Kereiakes DJ, et al. Impact of lesion length and vessel size  
33 on clinical outcomes after percutaneous coronary intervention with everolimus-  
34 versus paclitaxel-eluting stents pooled analysis from the SPIRIT (Clinical  
35 Evaluation of the XIENCE V Everolimus Eluting Coronary Stent System) and COMPARE  
36 (Second-generation everolimus-eluting and paclitaxel-eluting stents in real-life  
37 practice) Randomized Trials. *JACC Cardiovascular interventions* 2011;4(11):1209-  
38 15. doi: 10.1016/j.jcin.2011.07.016.
- 39 51. Kastrati A, Elezi S, Dirschinger J, et al. Influence of lesion length on restenosis  
40 after coronary stent placement. *The American journal of cardiology*  
41 1999;83(12):1617-22. doi: 10.1016/s0002-9149(99)00165-4.

- 1  
2  
3 1 52. Choi IJ, Koh YS, Lim S, et al. Impact of the stent length on long-term clinical  
4 2 outcomes following newer-generation drug-eluting stent implantation. *The American*  
5 3 *journal of cardiology* 2014;113(3):457-64. doi: 10.1016/j.amjcard.2013.10.029.  
6 4  
7 53. Leclerc G, Isner JM, Kearney M, et al. Evidence implicating nonmuscle myosin in  
8 5 restenosis. Use of in situ hybridization to analyze human vascular lesions  
9 6 obtained by directional atherectomy. *Circulation* 1992;85(2):543-53. doi:  
10 7 10.1161/01.cir.85.2.543.  
11 8  
12 54. Brodie BR, Stuckey TD, Hansen C, et al. Benefit of coronary reperfusion before  
13 9 intervention on outcomes after primary angioplasty for acute myocardial  
14 10 infarction. *The American journal of cardiology* 2000;85(1):13-8. doi:  
15 11 10.1016/s0002-9149(99)00598-6.  
16 12  
17 55. De Luca G, Ernst N, Zijlstra F, et al. Preprocedural TIMI flow and mortality in  
18 13 patients with acute myocardial infarction treated by primary angioplasty. *Journal*  
19 14 *of the American College of Cardiology* 2004;43(8):1363-7. doi:  
20 15 10.1016/j.jacc.2003.11.042.  
21 16  
22 56. Lee KL, Woodlief LH, Topol EJ, et al. Predictors of 30-day mortality in the era of  
23 17 reperfusion for acute myocardial infarction. Results from an international trial  
24 18 of 41,021 patients. GUSTO-I Investigators. *Circulation* 1995;91(6):1659-68. doi:  
25 19 10.1161/01.cir.91.6.1659.  
26 20  
27 57. Del Buono MG, Montone RA, Rinaldi R, et al. Clinical predictors and prognostic role  
28 21 of high Killip class in patients with a first episode of anterior ST-segment  
29 22 elevation acute myocardial infarction. *Journal of cardiovascular medicine*  
30 23 *(Hagerstown, Md)* 2021;22(7):530-38. doi: 10.2459/jcm.0000000000001168.  
31 24  
32 58. Shariat SF, Karakiewicz PI, Godoy G, et al. Use of nomograms for predictions of  
33 25 outcome in patients with advanced bladder cancer. *Ther Adv Urol* 2009;1(1):13-26.  
34 26 doi: 10.1177/1756287209103923.  
35 27  
36 59. Balachandran VP, Gonen M, Smith JJ, et al. Nomograms in oncology: more than meets  
37 28 the eye. *The Lancet Oncology* 2015;16(4):e173-80. doi: 10.1016/s1470-  
38 29 2045(14)71116-7.  
39 30  
40 60. Iasonos A, Schrag D, Raj GV, et al. How to build and interpret a nomogram for cancer  
41 31 prognosis. *Journal of clinical oncology : official journal of the American Society*  
42 32 *of Clinical Oncology* 2008;26(8):1364-70. doi: 10.1200/jco.2007.12.9791.  
43 33  
44 61. Gao N, Qi X, Dang Y, et al. Establishment and validation of a risk model for  
45 34 prediction of in-hospital mortality in patients with acute ST-elevation  
46 35 myocardial infarction after primary PCI. *BMC cardiovascular disorders*  
47 36 2020;20(1):513. doi: 10.1186/s12872-020-01804-7.  
48  
49  
50  
51 37  
52  
53  
54  
55  
56  
57  
58  
59  
60

Table 1 Clinical characteristics of the patients selected as predictors for the nomogram

| Variables                                                   | Training set         |                      |                                  |        | Testing set        |                   |                                 |        |
|-------------------------------------------------------------|----------------------|----------------------|----------------------------------|--------|--------------------|-------------------|---------------------------------|--------|
|                                                             | All<br>(n=396)       | Survival (n=264)     | In-hospital mortality<br>(n=132) | P      | All<br>(n=459)     | Survival (n=368)  | In-hospital<br>mortality (n=91) | P      |
| Age (years) (mean ±SD)                                      | 63.3±12.7            | 60.3±12.9            | 69.3±9.8                         | <0.001 | 62.1±12.8          | 59.8±12.4         | 70.2±11.3                       | <0.001 |
| BMI (kg/m <sup>2</sup> )                                    | 25.8 (24.6, 26.1)    | 26.0 (25.3, 26.5)    | 24.9 (24.4, 25.5)                | <0.001 | 25.4 (23.4, 27.3)  | 25.5±3.0          | 25.3 (23.4, 27.5)               | 0.047  |
| SBP on admission<br>(median (IQR))                          | 128 (110, 146)       | 133 (114, 149)       | 118 (100, 140)                   | <0.001 | 125 (110, 140)     | 129±25            | 121 (107, 135)                  | 0.009  |
| Long lesions (n (%))                                        | 245 (61.9)           | 178 (67.4)           | 67 (50.8)                        | 0.002  | 194 (42.3)         | 131 (35.6)        | 63 (69.2)                       | <0.001 |
| TIMI flow grade 0-1 before PCI (n (%))                      | 311 (78.5)           | 197 (74.6)           | 114 (86.4)                       | 0.011  | 339 (73.9)         | 274 (74.5)        | 65 (71.4)                       | 0.556  |
| N/L ratio (median (IQR))                                    | 5.47 (2.82, 10.00)   | 4.70 (2.68, 7.87)    | 8.54 (3.19, 11.46)               | <0.001 | 6.15 (3.48, 9.52)  | 5.08 (3.65, 9.46) | 9.1 (3.81, 12.51)               | <0.001 |
| HGB, g/L (median (IQR))                                     | 137.0 (126.0, 269.0) | 142.0 (129.0, 155.0) | 129.0 (119.0, 137.3)             | <0.001 | 137.2±19.8         | 138.5±19.1        | 131.9±21.5                      | 0.004  |
| Random blood glucose on admission,<br>mmol/L (median (IQR)) | 6.84 (5.47, 9.92)    | 5.95 (5.02, 7.44)    | 9.81 (7.96, 11.04)               | <0.001 | 6.73 (5.27, 10.10) | 6.12 (5.10, 8.10) | 10.96 (8.40, 11.78)             | <0.001 |
| EF after PCI (median (IQR))                                 | 51.0 (43.0, 58.0)    | 54.0 (47.8, 59.0)    | 43.0 (38.0, 48.5)                | <0.001 | 55 (46, 60)        | 56 (51, 61)       | 45 (37, 53)                     | <0.001 |
| Use Aspirin on admission(n(%))                              | 379 (95.7)           | 262 (99.2)           | 117 (88.6)                       | <0.001 | 404 (88.0)         | 332 (90.2)        | 72 (79.1)                       | 0.004  |

BMI: body mass index; SBP: systolic blood pressure; N/L ratio: neutrophils/lymphocytes ratio; HGB: hemoglobin; EF: ejection fraction

**Table 2 Variables selected as predictors for the nomogram according to the multivariable logistic analysis**

| Variables                         | Univariate analysis |           |        | Multivariate analysis |            |        |
|-----------------------------------|---------------------|-----------|--------|-----------------------|------------|--------|
|                                   | OR                  | 95% CI    | P      | OR                    | 95% CI     | P      |
| Age                               | 1.07                | 1.05-1.09 | <0.001 | 1.07                  | 1.05-1.09  | 0.049  |
| BMI                               | 0.79                | 0.70-0.87 | <0.001 | 0.55                  | 0.31-0.87  | 0.019  |
| SBP on admission                  | 0.98                | 0.97-0.99 | <0.001 | 0.92                  | 0.86-0.97  | 0.009  |
| HGB                               | 0.97                | 0.95-0.98 | <0.001 | 0.85                  | 0.73-0.97  | 0.017  |
| Random blood glucose on admission | 1.38                | 1.27-1.51 | <0.001 | 1.53                  | 1.13-2.21  | 0.011  |
| EF after PCI                      | 0.91                | 0.88-0.93 | <0.001 | 0.89                  | 0.80-0.97  | 0.015  |
| Use aspirin before admission      | 0.06                | 0.01-0.22 | <0.001 | 0.01                  | 0.009-0.04 | 0.001  |
| N/L ratio                         | 1.08                | 1.04-1.12 | <0.001 | 1.34                  | 1.12-1.69  | 0.004  |
| Long lesions                      | 0.50                | 0.32-0.76 | 0.001  | 2.00                  | 1.31-3.08  | <0.001 |
| TIMI flow grade 0-1 before PCI    | 2.15                | 1.24-3.90 | <0.001 | 2.15                  | 1.24-3.90  | 0.008  |

OR: odds ratio; CI: confidence interval; BMI: body mass index; SBP: systolic blood pressure; HGB: hemoglobin; EF: ejection fraction;

PCI: percutaneous coronary intervention; N/L ratio: neutrophils/lymphocytes ratio; TIMI: thrombolysis in myocardial infarction

## Figure legends

**Figure 1.** Flowchart illustrating the process of patient selection.

**Figure 2.** The nomogram for the prediction of in-hospital mortality in patients with acute ST-elevation myocardial infarction after primary PCI. BMI: body mass index; SBP: systolic blood pressure; HGB: hemoglobin; EF: ejection fraction; N/L ratio: neutrophils/lymphocytes ratio.

**Figure 3.** The calibration curves of the nomogram for the training set (A) and the testing set (B).

**Figure 4.** The received operating characteristics (ROC) curves of the nomogram for the training set (A) and the testing set (B).

**Figure 5.** The decision curve analysis (DCA) for the risk model for the training set (A) and the testing set (B).

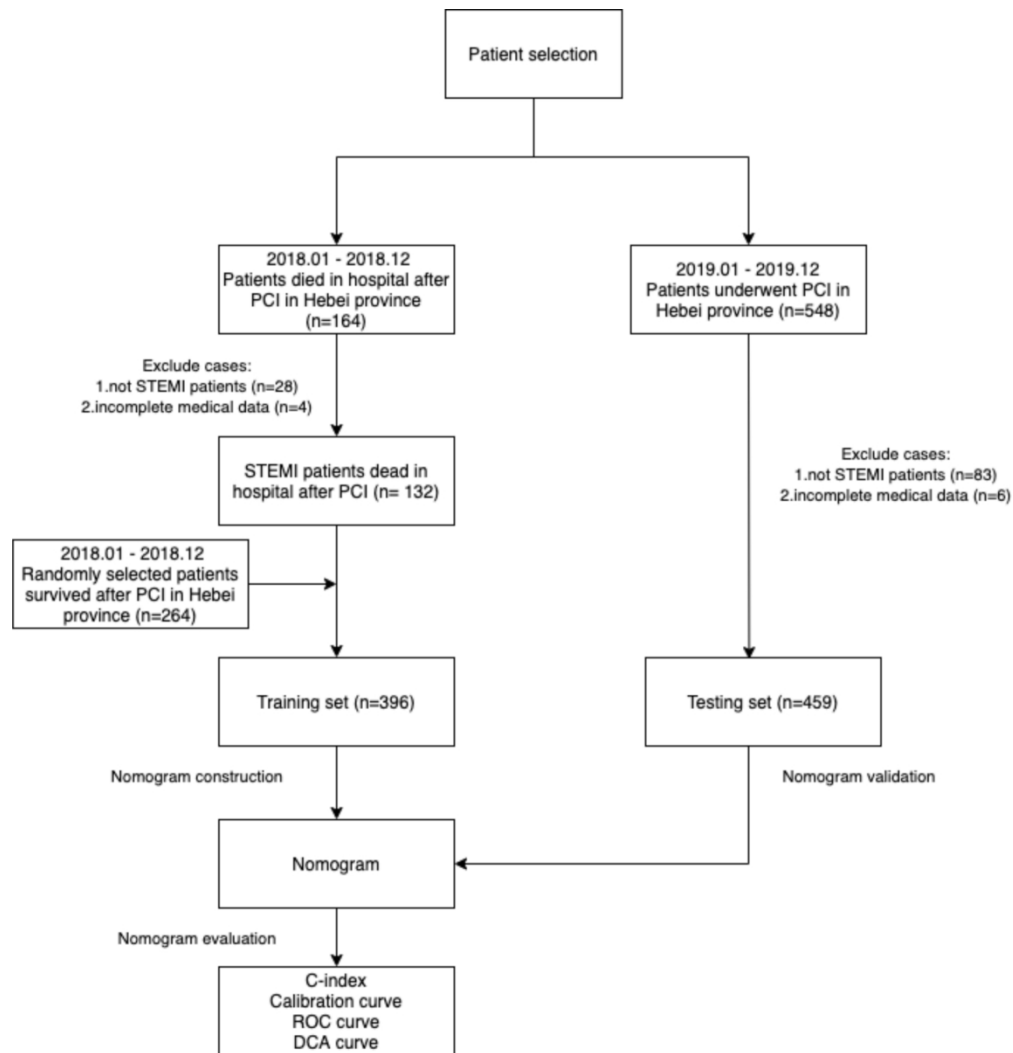

Figure 1. Flowchart illustrating the process of patient selection.

170x177mm (300 x 300 DPI)

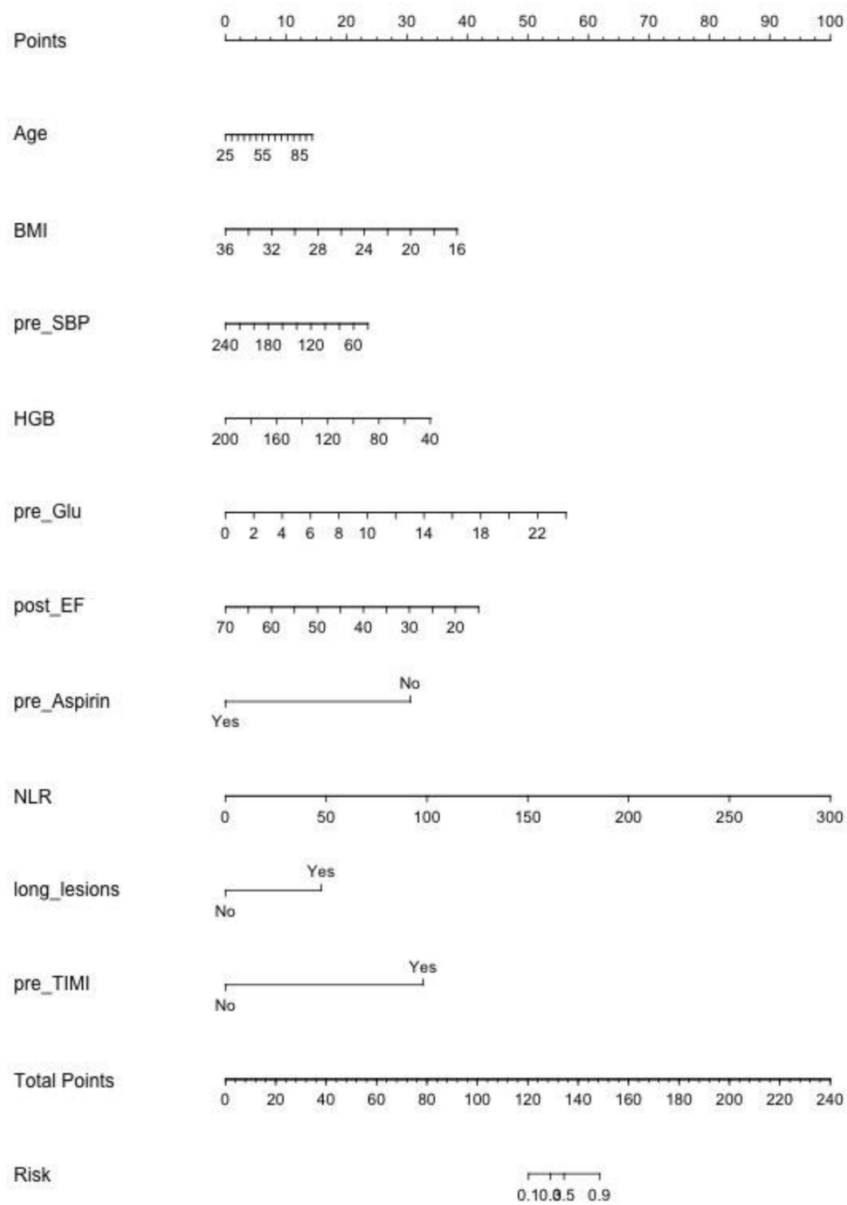

Figure 2. The nomogram for the prediction of in-hospital mortality in patients with acute ST-elevation myocardial infarction after primary PCI. BMI: body mass index; SBP: systolic blood pressure; HGB: hemoglobin; EF: ejection fraction; N/L ratio: neutrophils/lymphocytes ratio.

170x242mm (300 x 300 DPI)

1  
2  
3  
4  
5  
6  
7  
8  
9  
10  
11  
12  
13  
14  
15  
16  
17  
18  
19  
20  
21  
22  
23  
24  
25  
26  
27  
28  
29  
30  
31  
32  
33  
34  
35  
36  
37  
38  
39  
40  
41  
42  
43  
44  
45  
46  
47  
48  
49  
50  
51  
52  
53  
54  
55  
56  
57  
58  
59  
60

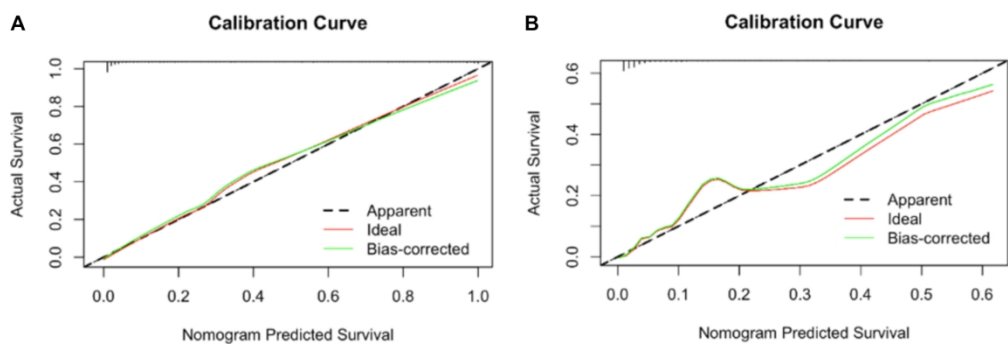

Figure 3. The calibration curves of the nomogram for the training set (A) and the testing set (B).

170x56mm (300 x 300 DPI)



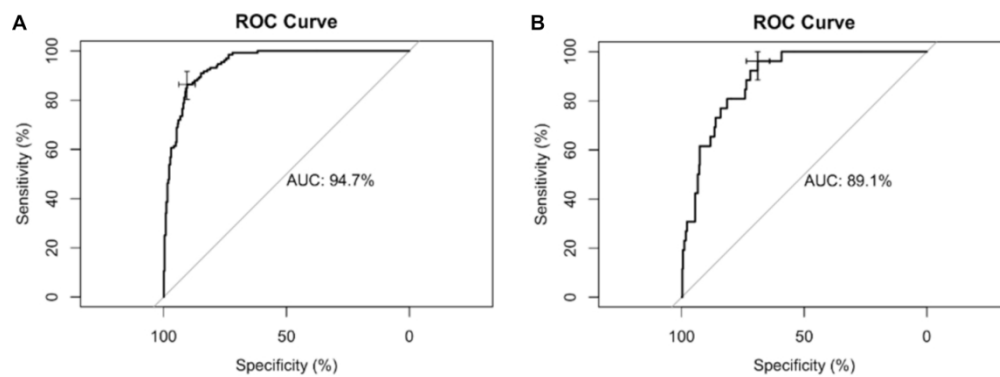

Figure 4. The received operating characteristics (ROC) curves of the nomogram for the training set (A) and the testing set (B).

170x61mm (300 x 300 DPI)

1  
2  
3  
4  
5  
6  
7  
8  
9  
10  
11  
12  
13  
14  
15  
16  
17  
18  
19  
20  
21  
22  
23  
24  
25  
26  
27  
28  
29  
30  
31  
32  
33  
34  
35  
36  
37  
38  
39  
40  
41  
42  
43  
44  
45  
46  
47  
48  
49  
50  
51  
52  
53  
54  
55  
56  
57  
58  
59  
60

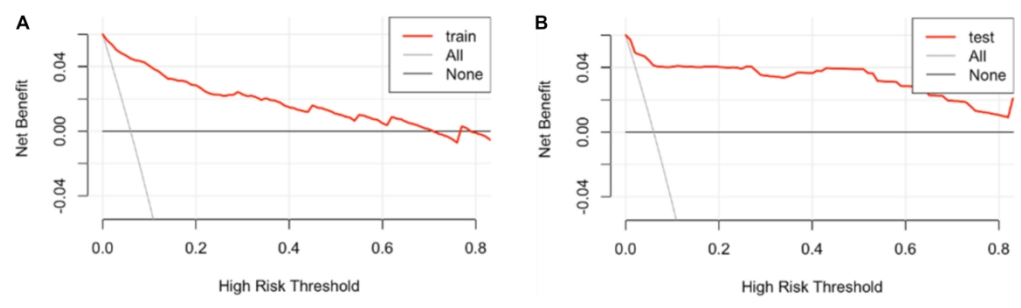

Figure 5. The decision curve analysis (DCA) for the risk model for the training set (A) and the testing set (B).

170x48mm (300 x 300 DPI)

Supplement Table 1. Clinical characteristics of the patients used to construct the nomogram

| Variables                                           | Training set      |                   |                                  |          | Testing set       |                  |                                 |          |
|-----------------------------------------------------|-------------------|-------------------|----------------------------------|----------|-------------------|------------------|---------------------------------|----------|
|                                                     | All<br>(n=396)    | Survival (n=264)  | In-hospital<br>mortality (n=132) | <i>P</i> | All<br>(n=459)    | Survival (n=368) | In-hospital<br>mortality (n=91) | <i>P</i> |
| Age (years) (mean ±SD)                              | 63.3±12.7         | 60.3±12.9         | 69.3±9.8                         | <0.001   | 62.1±12.8         | 59.8±12.4        | 70.2±11.3                       | <0.001   |
| Male (n (%))                                        | 284 (71.7)        | 202 (76.5)        | 82 (62.1)                        | 0.004    | 352 (76.7)        | 294 (79.9)       | 58 (63.7)                       | 0.001    |
| BMI (kg/m <sup>2</sup> )                            | 25.8 (24.6, 26.1) | 26.0 (25.3, 26.5) | 24.9 (24.4, 25.5)                | <0.001   | 25.4 (23.4, 27.3) | 25.5±3.0         | 25.3 (23.4, 27.5)               | 0.047    |
| Cardiac arrest (n (%))                              | 10 (2.5)          | 6 (2.3)           | 4 (3.0)                          | 0.91     | 8 (1.7)           | 6 (1.6)          | 2 (2.2)                         | 0.711    |
| Cardiogenic shock before admission (n (%))          | 34 (8.6)          | 6 (2.3)           | 28 (21.2)                        | <0.001   | 30 (6.5)          | 15 (4.1)         | 15 (16.5)                       | <0.001   |
| Use of temporary pacemaker before admission (n (%)) | 3 (0.7)           | 0                 | 3 (2.3)                          | 0.065    | 4 (0.9)           | 2 (0.5)          | 2 (2.2)                         | 0.128    |
| Ventilator support before admission (n (%))         | 6 (1.5)           | 1 (0.4)           | 5 (3.8)                          | 0.029    | 7 (1.5)           | 2 (0.5)          | 5 (5.5)                         | 0.001    |
| CPR before admission                                | 12 (3.0)          | 5 (1.9)           | 7 (5.3)                          | 0.12     | 5 (1.1)           | 0                | 5 (5.5)                         | <0.001   |

|    |                                   |                |                |                |        |                |                |                |        |
|----|-----------------------------------|----------------|----------------|----------------|--------|----------------|----------------|----------------|--------|
| 1  |                                   |                |                |                |        |                |                |                |        |
| 2  |                                   |                |                |                |        |                |                |                |        |
| 3  |                                   |                |                |                |        |                |                |                |        |
| 4  |                                   |                |                |                |        |                |                |                |        |
| 5  |                                   | <b>(n (%))</b> |                |                |        |                |                |                |        |
| 6  |                                   |                |                |                |        |                |                |                |        |
| 7  |                                   |                |                |                |        |                |                |                |        |
| 8  | SBP on admission                  |                |                |                |        |                |                |                |        |
| 9  |                                   | 128 (110, 146) | 133 (114, 149) | 118 (100, 140) | <0.001 | 125 (110, 140) | 129±25         | 121 (107, 135) | 0.009  |
| 10 | <b>(median (IQR))</b>             |                |                |                |        |                |                |                |        |
| 11 |                                   |                |                |                |        |                |                |                |        |
| 12 | DBP on admission                  |                |                |                |        |                |                |                |        |
| 13 |                                   | 79 (69, 89)    | 82 (72, 92)    | 73 (62, 82)    | <0.001 | 77±16          | 80±15          | 69±16          | <0.001 |
| 14 | <b>(median (IQR))</b>             |                |                |                |        |                |                |                |        |
| 15 |                                   |                |                |                |        |                |                |                |        |
| 16 | Heart rate on admission           |                |                |                |        |                |                |                |        |
| 17 |                                   | 77 (65, 90)    | 76 (64, 89)    | 80 (66, 96)    | 0.025  | 79±18          | 78±17          | 82±24          | 0.095  |
| 18 | <b>(median (IQR))</b>             |                |                |                |        |                |                |                |        |
| 19 |                                   |                |                |                |        |                |                |                |        |
| 20 | Fatal arrhythmia before admission |                |                |                |        |                |                |                |        |
| 21 | <b>(n (%))</b>                    | 21 (5.3)       | 15 (5.7)       | 6 (4.5)        | 0.812  | 20 (4.4)       | 12 (3.3)       | 8 (8.8)        | 0.021  |
| 22 |                                   |                |                |                |        |                |                |                |        |
| 23 |                                   |                |                |                |        |                |                |                |        |
| 24 | Total ischemic time               |                |                |                |        |                |                |                |        |
| 25 |                                   | 217 (124, 367) | 154 (95, 250)  | 360 (194, 420) | <0.001 | 211 (130, 341) | 194 (125, 307) | 300 (222, 480) | <0.001 |
| 26 | <b>(min (median (IQR)))</b>       |                |                |                |        |                |                |                |        |
| 27 |                                   |                |                |                |        |                |                |                |        |
| 28 | Killip class 3-4                  |                |                |                |        |                |                |                |        |
| 29 | <b>(n (%))</b>                    | 132 (33.3)     | 95 (36.0)      | 37 (28.0)      | 0.142  | 119 (25.9)     | 66 (17.9)      | 53 (58.2)      | <0.001 |
| 30 |                                   |                |                |                |        |                |                |                |        |
| 31 | Past medical history              |                |                |                |        |                |                |                |        |
| 32 |                                   |                |                |                |        |                |                |                |        |
| 33 | <i>Hypertension</i>               |                |                |                |        |                |                |                |        |
| 34 | <b>(n (%))</b>                    | 211 (53.3)     | 137 (51.9)     | 74 (56.1)      | 0.499  | 73 (15.9)      | 38 (10.3)      | 35 (38.5)      | <0.001 |
| 35 |                                   |                |                |                |        |                |                |                |        |
| 36 | <i>DM</i>                         |                |                |                |        |                |                |                |        |
| 37 | <b>(n (%))</b>                    | 96 (24.2)      | 49 (18.6)      | 47 (35.6)      | <0.001 | 104 (22.7)     | 84 (22.8)      | 20 (22.0)      | 0.863  |
| 38 |                                   |                |                |                |        |                |                |                |        |
| 39 |                                   |                |                |                |        |                |                |                |        |
| 40 |                                   |                |                |                |        |                |                |                |        |
| 41 |                                   |                |                |                |        |                |                |                |        |
| 42 |                                   |                |                |                |        |                |                |                |        |
| 43 |                                   |                |                |                |        |                |                |                |        |
| 44 |                                   |                |                |                |        |                |                |                |        |
| 45 |                                   |                |                |                |        |                |                |                |        |
| 46 |                                   |                |                |                |        |                |                |                |        |

|    |                                                   |           |           |           |        |           |           |           |        |
|----|---------------------------------------------------|-----------|-----------|-----------|--------|-----------|-----------|-----------|--------|
| 1  |                                                   |           |           |           |        |           |           |           |        |
| 2  |                                                   |           |           |           |        |           |           |           |        |
| 3  |                                                   |           |           |           |        |           |           |           |        |
| 4  |                                                   |           |           |           |        |           |           |           |        |
| 5  | <i>Hyperlipidemia (n (%))</i>                     | 39 (9.8)  | 12 (4.5)  | 27 (20.5) | <0.001 | 41 (8.9)  | 23 (6.3)  | 18 (19.8) | <0.001 |
| 6  |                                                   |           |           |           |        |           |           |           |        |
| 7  | <i>Previous PCI (n (%))</i>                       | 18 (4.5)  | 8 (3.0)   | 10 (7.6)  | 0.073  | 23 (5.0)  | 17 (4.6)  | 6 (6.6)   | 0.44   |
| 8  |                                                   |           |           |           |        |           |           |           |        |
| 9  | <i>Previous CABG (n (%))</i>                      | 1 (0.2)   | 0         | 1 (0.8)   | 0.157  | 1 (0.2)   | 0         | 1 (1.1)   | 0.05   |
| 10 |                                                   |           |           |           |        |           |           |           |        |
| 11 |                                                   |           |           |           |        |           |           |           |        |
| 12 | <i>CAD (n (%))</i>                                | 45 (11.4) | 17 (6.4)  | 28 (21.2) | <0.001 | 40 (8.7)  | 20 (5.4)  | 20 (22.0) | <0.001 |
| 13 |                                                   |           |           |           |        |           |           |           |        |
| 14 | <i>AF (n (%))</i>                                 | 11 (2.8)  | 1 (0.4)   | 10 (7.6)  | <0.001 | 13 (2.8)  | 3 (0.8)   | 10 (11.0) | <0.001 |
| 15 |                                                   |           |           |           |        |           |           |           |        |
| 16 | <i>HF (n (%))</i>                                 | 4 (1.0)   | 3 (1.1)   | 1 (0.8)   | 0.722  | 25 (5.4)  | 18 (4.9)  | 7 (7.7)   | 0.292  |
| 17 |                                                   |           |           |           |        |           |           |           |        |
| 18 |                                                   |           |           |           |        |           |           |           |        |
| 19 | <i>Renal insufficiency (n (%))</i>                | 62 (15.7) | 1 (0.4)   | 61 (46.2) | <0.001 | 13 (2.8)  | 1 (0.3)   | 12 (13.2) | <0.001 |
| 20 |                                                   |           |           |           |        |           |           |           |        |
| 21 | <i>History of cerebrovascular disease (n (%))</i> | 64 (16.2) | 40 (15.2) | 24 (18.2) | 0.53   | 72 (15.7) | 60 (16.3) | 12 (13.2) | 0.464  |
| 22 |                                                   |           |           |           |        |           |           |           |        |
| 23 |                                                   |           |           |           |        |           |           |           |        |
| 24 | <i>Peripheral vascular disease (n (%))</i>        | 9 (2.3)   | 5 (1.9)   | 4 (3.0)   | 0.721  | 5 (1.1)   | 3 (0.8)   | 2 (2.2)   | 0.255  |
| 25 |                                                   |           |           |           |        |           |           |           |        |
| 26 |                                                   |           |           |           |        |           |           |           |        |
| 27 |                                                   |           |           |           |        |           |           |           |        |
| 28 | <i>History of bleeding (n (%))</i>                | 2 (0.5)   | 1 (0.4)   | 1 (0.8)   | >0.999 | 7 (1.5)   | 6 (1.6)   | 1 (1.1)   | 0.711  |
| 29 |                                                   |           |           |           |        |           |           |           |        |
| 30 | <i>Family history of CAD (n (%))</i>              | 44 (11.1) | 28 (10.6) | 16 (11.1) | 0.875  | 68 (14.8) | 62 (16.8) | 6 (6.6)   | 0.014  |
| 31 |                                                   |           |           |           |        |           |           |           |        |
| 32 |                                                   |           |           |           |        |           |           |           |        |
| 33 | <b>Angiographic characteristics</b>               |           |           |           |        |           |           |           |        |
| 34 |                                                   |           |           |           |        |           |           |           |        |
| 35 | <i>Number of stents (median (IQR))</i>            | 1 (1, 1)  | 1 (1, 1)  | 1 (0, 1)  | <0.001 | 1 (1, 1)  | 1 (1, 1)  | 1 (1, 1)  | 0.137  |
| 36 |                                                   |           |           |           |        |           |           |           |        |
| 37 |                                                   |           |           |           |        |           |           |           |        |
| 38 |                                                   |           |           |           |        |           |           |           |        |
| 39 |                                                   |           |           |           |        |           |           |           |        |
| 40 |                                                   |           |           |           |        |           |           |           |        |
| 41 |                                                   |           |           |           |        |           |           |           |        |
| 42 |                                                   |           |           |           |        |           |           |           |        |
| 43 |                                                   |           |           |           |        |           |           |           |        |
| 44 |                                                   |           |           |           |        |           |           |           |        |
| 45 |                                                   |           |           |           |        |           |           |           |        |
| 46 |                                                   |           |           |           |        |           |           |           |        |

|    |                                        |            |            |           |        |            |            |           |        |
|----|----------------------------------------|------------|------------|-----------|--------|------------|------------|-----------|--------|
| 1  |                                        |            |            |           |        |            |            |           |        |
| 2  |                                        |            |            |           |        |            |            |           |        |
| 3  |                                        |            |            |           |        |            |            |           |        |
| 4  |                                        |            |            |           |        |            |            |           |        |
| 5  | <i>Long lesions (n (%))</i>            | 245 (61.9) | 178 (67.4) | 67 (50.8) | 0.002  | 194 (42.3) | 131 (35.6) | 63 (69.2) | <0.001 |
| 6  |                                        |            |            |           |        |            |            |           |        |
| 7  | <i>Thrombus aspiration (n (%))</i>     | 123 (31.1) | 92 (34.8)  | 31 (23.5) | 0.029  | 221 (48.1) | 205 (55.7) | 16 (17.6) | <0.001 |
| 8  |                                        |            |            |           |        |            |            |           |        |
| 9  | <i>Residual stenosis (n (%))</i>       | 12 (3.0)   | 2 (0.8)    | 10 (7.6)  | 0.001  | 10 (2.2)   | 4 (1.1)    | 6 (6.6)   | 0.001  |
| 10 |                                        |            |            |           |        |            |            |           |        |
| 11 | <i>Use temporary pacemaker (n (%))</i> | 22 (5.6)   | 4 (1.5)    | 18 (13.6) | <0.001 | 9 (2.0)    | 2 (0.5)    | 7 (7.7)   | <0.001 |
| 12 |                                        |            |            |           |        |            |            |           |        |
| 13 |                                        |            |            |           |        |            |            |           |        |
| 14 | <i>IABP (n (%))</i>                    | 19 (4.8)   | 4 (1.5)    | 15 (11.4) | <0.001 | 15 (3.3)   | 4 (1.1)    | 11 (12.1) | <0.001 |
| 15 |                                        |            |            |           |        |            |            |           |        |
| 16 | <i>Respirator support (n (%))</i>      | 20 (5.1)   | 1 (0.4)    | 19 (14.4) | <0.001 | 13 (2.8)   | 2 (0.5)    | 11 (12.1) | <0.001 |
| 17 |                                        |            |            |           |        |            |            |           |        |
| 18 |                                        |            |            |           |        |            |            |           |        |
| 19 | <i>Pericardial aspiration (n (%))</i>  | 3 (0.8)    | 0          | 3 (2.3)   | 0.065  | 3 (0.7)    | 0          | 3 (3.3)   | <0.001 |
| 20 |                                        |            |            |           |        |            |            |           |        |
| 21 | <i>No flow (n (%))</i>                 | 98 (24.7)  | 48 (18.2)  | 50 (37.9) | <0.001 | 84 (18.3)  | 55 (14.9)  | 29 (31.9) | <0.001 |
| 22 |                                        |            |            |           |        |            |            |           |        |
| 23 | <i>Coronary perforation (n (%))</i>    | 5 (1.3)    | 0          | 5 (3.8)   | 0.001  | 2 (0.4)    | 1 (0.3)    | 1 (1.1)   | 0.283  |
| 24 |                                        |            |            |           |        |            |            |           |        |
| 25 |                                        |            |            |           |        |            |            |           |        |
| 26 | <i>Dissection (n (%))</i>              | 3 (0.8)    | 0          | 3 (2.3)   | 0.065  | 5 (1.1)    | 0          | 5 (5.5)   | <0.001 |
| 27 |                                        |            |            |           |        |            |            |           |        |
| 28 | <i>Pericardial tamponade (n (%))</i>   | 9 (2.3)    | 0          | 9 (6.8)   | <0.001 | 2 (0.4)    | 0          | 2 (2.2)   | 0.004  |
| 29 |                                        |            |            |           |        |            |            |           |        |
| 30 | <i>Acute HF (n (%))</i>                | 55 (13.9)  | 22 (8.3)   | 33 (25.0) | <0.001 | 52 (11.3)  | 30 (7.7)   | 22 (24.2) | <0.001 |
| 31 |                                        |            |            |           |        |            |            |           |        |
| 32 | <i>Bleeding (n (%))</i>                | 2 (0.5)    | 0          | 2 (1.5)   | 0.21   | 6 (1.3)    | 3 (0.8)    | 3 (3.3)   | 0.062  |
| 33 |                                        |            |            |           |        |            |            |           |        |
| 34 |                                        |            |            |           |        |            |            |           |        |
| 35 | <i>Cardiac arrest (n (%))</i>          | 24 (6.1)   | 1 (0.4)    | 23 (17.4) | <0.001 | 14 (3.1)   | 6 (1.6)    | 8 (8.8)   | <0.001 |
| 36 |                                        |            |            |           |        |            |            |           |        |
| 37 | <i>Recurrent MI (n (%))</i>            | 16 (4.0)   | 1 (0.4)    | 15 (11.4) | <0.001 | 7 (1.5)    | 2 (0.5)    | 5 (5.5)   | 0.001  |
| 38 |                                        |            |            |           |        |            |            |           |        |
| 39 |                                        |            |            |           |        |            |            |           |        |
| 40 |                                        |            |            |           |        |            |            |           |        |
| 41 |                                        |            |            |           |        |            |            |           |        |
| 42 |                                        |            |            |           |        |            |            |           |        |
| 43 |                                        |            |            |           |        |            |            |           |        |
| 44 |                                        |            |            |           |        |            |            |           |        |
| 45 |                                        |            |            |           |        |            |            |           |        |
| 46 |                                        |            |            |           |        |            |            |           |        |

|    |                                         |                   |                   |                   |        |                   |            |           |        |
|----|-----------------------------------------|-------------------|-------------------|-------------------|--------|-------------------|------------|-----------|--------|
| 1  |                                         |                   |                   |                   |        |                   |            |           |        |
| 2  |                                         |                   |                   |                   |        |                   |            |           |        |
| 3  |                                         |                   |                   |                   |        |                   |            |           |        |
| 4  |                                         |                   |                   |                   |        |                   |            |           |        |
| 5  | <i>Stent thrombosis (n (%))</i>         | 8 (2.0)           | 6 (2.3)           | 2 (1.5)           | 0.9    | 14 (3.1)          | 13 (3.5)   | 1 (1.1)   | 0.227  |
| 6  |                                         |                   |                   |                   |        |                   |            |           |        |
| 7  | <i>Type B2-C (n (%))</i>                | 309 (78.0)        | 213 (80.7)        | 96 (72.7)         | 0.094  | 277 (60.3)        | 230 (62.5) | 47 (51.6) | 0.058  |
| 8  |                                         |                   |                   |                   |        |                   |            |           |        |
| 9  | <i>TIMI flow grade 0-1 before PCI</i>   |                   |                   |                   |        |                   |            |           |        |
| 10 |                                         |                   |                   |                   |        |                   |            |           |        |
| 11 | <i>(n (%))</i>                          | 311 (78.5)        | 197 (74.6)        | 114 (86.4)        | 0.011  | 339 (73.9)        | 274 (74.5) | 65 (71.4) | 0.556  |
| 12 |                                         |                   |                   |                   |        |                   |            |           |        |
| 13 | <i>Use of GP IIb/IIIa inhibitors (n</i> |                   |                   |                   |        |                   |            |           |        |
| 14 | <i>(%))</i>                             | 92 (23.2)         | 54 (20.5)         | 38 (28.8)         | 0.064  | 107 (23.3)        | 80 (21.7)  | 27 (29.7) | 0.109  |
| 15 |                                         |                   |                   |                   |        |                   |            |           |        |
| 16 | <i>multivessel CAD (n (%))</i>          | 316 (79.8)        | 207 (78.4)        | 109 (82.6)        | 0.33   | 373 (81.3)        | 296 (80.4) | 77 (84.6) | 0.36   |
| 17 |                                         |                   |                   |                   |        |                   |            |           |        |
| 18 | <i>LAD (n (%))</i>                      | 149 (37.6)        | 85 (32.2)         | 64 (48.5)         | 0.002  | 209 (45.5)        | 177 (48.1) | 32 (35.2) | 0.027  |
| 19 |                                         |                   |                   |                   |        |                   |            |           |        |
| 20 | <i>LCX (n (%))</i>                      | 59 (14.9)         | 39 (14.8)         | 20 (15.2)         | 0.921  | 64 (13.9)         | 46 (12.5)  | 18 (19.8) | 0.072  |
| 21 |                                         |                   |                   |                   |        |                   |            |           |        |
| 22 | <i>RCA (n (%))</i>                      | 101 (25.5)        | 101 (38.3)        | 40 (30.3)         | 0.119  | 144 (31.4)        | 120 (32.6) | 24 (26.4) | 0.251  |
| 23 |                                         |                   |                   |                   |        |                   |            |           |        |
| 24 |                                         |                   |                   |                   |        |                   |            |           |        |
| 25 |                                         |                   |                   |                   |        |                   |            |           |        |
| 26 | <i>Biochemical markers</i>              |                   |                   |                   |        |                   |            |           |        |
| 27 |                                         |                   |                   |                   |        |                   |            |           |        |
| 28 | <i>Hyperkalemia (n (%))</i>             | 36 (9.1)          | 3 (1.1)           | 33 (25.0)         | <0.001 | 30 (6.5)          | 11 (3.0)   | 19 (20.9) | <0.001 |
| 29 |                                         |                   |                   |                   |        |                   |            |           |        |
| 30 | <i>Hyponatremia (n (%))</i>             | 29 (7.3)          | 12 (4.5)          | 19 (14.4)         | 0.001  | 37 (8.1)          | 31 (8.4)   | 6 (6.6)   | 0.566  |
| 31 |                                         |                   |                   |                   |        |                   |            |           |        |
| 32 | <i>Anemia (n (%))</i>                   | 26 (6.6)          | 12 (4.5)          | 14 (10.6)         | 0.022  | 40 (8.7)          | 21 (5.7)   | 19 (20.9) | <0.001 |
| 33 |                                         |                   |                   |                   |        |                   |            |           |        |
| 34 | <i>Creatinine (median (IQR))</i>        | 86.2 (76.9, 90.6) | 86.2 (70.6, 86.2) | 90.6 (77.0, 95.5) | 0.111  | 92.5 (64.5, 93.0) | 85.1±32.1  | 91.1±53.5 | 0.17   |
| 35 |                                         |                   |                   |                   |        |                   |            |           |        |
| 36 |                                         |                   |                   |                   |        |                   |            |           |        |
| 37 |                                         |                   |                   |                   |        |                   |            |           |        |
| 38 |                                         |                   |                   |                   |        |                   |            |           |        |
| 39 |                                         |                   |                   |                   |        |                   |            |           |        |
| 40 |                                         |                   |                   |                   |        |                   |            |           |        |
| 41 |                                         |                   |                   |                   |        |                   |            |           |        |
| 42 |                                         |                   |                   |                   |        |                   |            |           |        |
| 43 |                                         |                   |                   |                   |        |                   |            |           |        |
| 44 |                                         |                   |                   |                   |        |                   |            |           |        |
| 45 |                                         |                   |                   |                   |        |                   |            |           |        |
| 46 |                                         |                   |                   |                   |        |                   |            |           |        |

1  
2  
3  
4  
5  
6  
7  
8  
9  
10  
11  
12  
13  
14  
15  
16  
17  
18  
19  
20  
21  
22  
23  
24  
25  
26  
27  
28  
29  
30  
31  
32  
33  
34  
35  
36  
37  
38  
39  
40  
41  
42  
43  
44  
45  
46

|                                                                 |                      |                      |                      |        |                      |                      |                      |        |
|-----------------------------------------------------------------|----------------------|----------------------|----------------------|--------|----------------------|----------------------|----------------------|--------|
| <i>N/L ratio (median (IQR))</i>                                 | 5.47 (2.82, 10.00)   | 4.70 (2.68, 7.87)    | 8.54 (3.19, 11.46)   | <0.001 | 6.15 (3.48, 9.52)    | 5.08 (3.65, 9.46)    | 9.1 (3.81, 12.51)    | <0.001 |
| <i>HCT, % (median (IQR))</i>                                    | 41.0 (37.1, 44.0)    | 41.8 (38.0, 44.6)    | 38.5 (36.8, 41.3)    | <0.001 | 40.4 (37.4, 44.5)    | 40.0±5.2             | 38.0 (32.7, 43.3)    | <0.001 |
| <i>HGB, g/L (median (IQR))</i>                                  | 137.0 (126.0, 269.0) | 142.0 (129.0, 155.0) | 129.0 (119.0, 137.3) | <0.001 | 137.2±19.8           | 138.5±19.1           | 131.9±21.5           | 0.004  |
| <i>PLT, ×10<sup>9</sup>/L (median (IQR))</i>                    | 221.0 (183.5, 269.0) | 224.0 (186.0, 269.0) | 227.0 (194.8, 246.3) | 0.554  | 225.0 (184.0, 260.0) | 229.0 (187.0, 264.0) | 215.0 (175.0, 254.0) | 0.151  |
| <i>Random blood glucose on admission, mmol/L (median (IQR))</i> | 6.84 (5.47, 9.92)    | 5.95 (5.02, 7.44)    | 9.81 (7.96, 11.04)   | <0.001 | 6.73 (5.27, 10.10)   | 6.12 (5.10, 8.10)    | 10.96 (8.40, 11.78)  | <0.001 |
| <i>EF after PCI (median (IQR))</i>                              | 51.0 (43.0, 58.0)    | 54.0 (47.8, 59.0)    | 43.0 (38.0, 48.5)    | <0.001 | 55 (46, 60)          | 56 (51, 61)          | 45 (37, 53)          | <0.001 |
| <b>Medication list on admission</b>                             |                      |                      |                      |        |                      |                      |                      |        |
| <i>(n (%))</i>                                                  |                      |                      |                      |        |                      |                      |                      |        |
| <i>Aspirin</i>                                                  | 379 (95.7)           | 262 (99.2)           | 117 (88.6)           | <0.001 | 404 (88.0)           | 332 (90.2)           | 72 (79.1)            | 0.004  |
| <i>Ticagrelor/clopidogrel</i>                                   | 393 (99.2)           | 262 (99.2)           | 131 (99.2)           | >0.999 | 418 (91.1)           | 332 (90.2)           | 86 (94.5)            | 0.199  |



|                                                  |                    |            |            |           |        |            |            |           |        |
|--------------------------------------------------|--------------------|------------|------------|-----------|--------|------------|------------|-----------|--------|
|                                                  | <i>Ticagrelor</i>  | 223 (56.3) | 162 (61.4) | 61 (46.2) |        | 218 (47.5) | 183 (49.7) | 35 (38.5) |        |
|                                                  | <i>clopidogrel</i> | 170 (42.9) | 100 (37.9) | 70 (53.0) |        | 200 (43.6) | 149 (40.5) | 51 (56.0) |        |
|                                                  | <i>ACEI/ARB</i>    | 133 (33.6) | 100 (37.9) | 33 (25.0) | 0.014  | 25 (5.4)   | 18 (4.9)   | 7 (7.7)   | 0.292  |
|                                                  | <i>β-Blocker</i>   | 92 (23.2)  | 66 (25.0)  | 26 (19.7) | 0.239  | 37 (8.1)   | 29 (7.9)   | 8 (8.9)   | 0.753  |
|                                                  | <i>Statin</i>      | 188 (47.5) | 130 (49.2) | 58 (43.9) | 0.319  | 206 (44.9) | 181 (49.2) | 25 (27.5) | <0.001 |
| mean duration of hospital stay<br>(median (IQR)) |                    | 8.51±5.11  | 9 (9,11)   | 1 (1,4)   | <0.001 | 8.32±4.70  | 9 (8,11)   | 2 (1,5)   | <0.001 |

BMI: body mass index; SBP: systolic blood pressure; DBP: diastolic blood pressure; DM: diabetes mellitus; PCI: percutaneous coronary intervention; CABG: coronary artery bypass graft; CAD: coronary atherosclerotic heart disease; AF: atrial fibrillation; HF: heart failure; IABP: intra-aortic balloon pump; MI: myocardial infarction; LAD: left anterior descending branch; LCX: left circumflex artery; RCA: right coronary artery; N/L ratio: neutrophils/lymphocytes ratio; HCT: hematocrit; HGB: hemoglobin; PLT: platelets; EF: ejection fraction; ACEI: angiotensin-converting enzyme inhibitor; ARB: angiotensin receptor blocker.

**STROBE 2007 (v4) checklist of items to be included in reports of observational studies in epidemiology\***  
**Checklist for cohort, case-control, and cross-sectional studies (combined)**

| Section/Topic             | Item # | Recommendation                                                                                                                                                                                                                                                                                                                                                                                                                                                         | Reported on page # |
|---------------------------|--------|------------------------------------------------------------------------------------------------------------------------------------------------------------------------------------------------------------------------------------------------------------------------------------------------------------------------------------------------------------------------------------------------------------------------------------------------------------------------|--------------------|
| Title and abstract        | 1      | (a) Indicate the study’s design with a commonly used term in the title or the abstract                                                                                                                                                                                                                                                                                                                                                                                 | 1                  |
|                           |        | (b) Provide in the abstract an informative and balanced summary of what was done and what was found                                                                                                                                                                                                                                                                                                                                                                    |                    |
| <b>Introduction</b>       |        |                                                                                                                                                                                                                                                                                                                                                                                                                                                                        |                    |
| Background/rationale      | 2      | Explain the scientific background and rationale for the investigation being reported                                                                                                                                                                                                                                                                                                                                                                                   | 4                  |
| Objectives                | 3      | State specific objectives, including any pre-specified hypotheses                                                                                                                                                                                                                                                                                                                                                                                                      | 5                  |
| <b>Methods</b>            |        |                                                                                                                                                                                                                                                                                                                                                                                                                                                                        |                    |
| Study design              | 4      | Present key elements of study design early in the paper                                                                                                                                                                                                                                                                                                                                                                                                                | 6                  |
| Setting                   | 5      | Describe the setting, locations, and relevant dates, including periods of recruitment, exposure, follow-up, and data collection                                                                                                                                                                                                                                                                                                                                        | 6                  |
| Participants              | 6      | (a) <i>Cohort study</i> —Give the eligibility criteria, and the sources and methods of selection of participants. Describe methods of follow-up<br><i>Case-control study</i> —Give the eligibility criteria, and the sources and methods of case ascertainment and control selection. Give the rationale for the choice of cases and controls<br><i>Cross-sectional study</i> —Give the eligibility criteria, and the sources and methods of selection of participants | 6                  |
|                           |        | (b) <i>Cohort study</i> —For matched studies, give matching criteria and number of exposed and unexposed<br><i>Case-control study</i> —For matched studies, give matching criteria and the number of controls per case                                                                                                                                                                                                                                                 |                    |
| Variables                 | 7      | Clearly define all outcomes, exposures, predictors, potential confounders, and effect modifiers. Give diagnostic criteria, if applicable                                                                                                                                                                                                                                                                                                                               | 6                  |
| Data sources/ measurement | 8*     | For each variable of interest, give sources of data and details of methods of assessment (measurement). Describe comparability of assessment methods if there is more than one group                                                                                                                                                                                                                                                                                   | 7                  |
| Bias                      | 9      | Describe any efforts to address potential sources of bias                                                                                                                                                                                                                                                                                                                                                                                                              | 7                  |
| Study size                | 10     | Explain how the study size was arrived at                                                                                                                                                                                                                                                                                                                                                                                                                              | 7                  |
| Quantitative variables    | 11     | Explain how quantitative variables were handled in the analyses. If applicable, describe which groupings were chosen and why                                                                                                                                                                                                                                                                                                                                           | 7                  |
| Statistical methods       | 12     | (a) Describe all statistical methods, including those used to control for confounding                                                                                                                                                                                                                                                                                                                                                                                  | 7                  |
|                           |        | (b) Describe any methods used to examine subgroups and interactions                                                                                                                                                                                                                                                                                                                                                                                                    |                    |
|                           |        | (c) Explain how missing data were addressed                                                                                                                                                                                                                                                                                                                                                                                                                            |                    |
|                           |        | (d) <i>Cohort study</i> —If applicable, explain how loss to follow-up was addressed<br><i>Case-control study</i> —If applicable, explain how matching of cases and controls was addressed                                                                                                                                                                                                                                                                              |                    |

|                          |     |                                                                                                                                                                                                                                                                                                                                                                                                               |    |
|--------------------------|-----|---------------------------------------------------------------------------------------------------------------------------------------------------------------------------------------------------------------------------------------------------------------------------------------------------------------------------------------------------------------------------------------------------------------|----|
|                          |     | <i>Cross-sectional study</i> —If applicable, describe analytical methods taking account of sampling strategy                                                                                                                                                                                                                                                                                                  |    |
|                          |     | (e) Describe any sensitivity analyses                                                                                                                                                                                                                                                                                                                                                                         |    |
| <b>Results</b>           |     |                                                                                                                                                                                                                                                                                                                                                                                                               |    |
| Participants             | 13* | (a) Report numbers of individuals at each stage of study—eg numbers potentially eligible, examined for eligibility, confirmed eligible, included in the study, completing follow-up, and analysed<br>(b) Give reasons for non-participation at each stage<br>(c) Consider use of a flow diagram                                                                                                               | 9  |
| Descriptive data         | 14* | (a) Give characteristics of study participants (eg demographic, clinical, social) and information on exposures and potential confounders<br>(b) Indicate number of participants with missing data for each variable of interest<br>(c) <i>Cohort study</i> —Summarise follow-up time (eg, average and total amount)                                                                                           | 9  |
| Outcome data             | 15* | <i>Cohort study</i> —Report numbers of outcome events or summary measures over time<br><i>Case-control study</i> —Report numbers in each exposure category, or summary measures of exposure<br><i>Cross-sectional study</i> —Report numbers of outcome events or summary measures                                                                                                                             | 9  |
| Main results             | 16  | (a) Give unadjusted estimates and, if applicable, confounder-adjusted estimates and their precision (eg, 95% confidence interval). Make clear which confounders were adjusted for and why they were included<br>(b) Report category boundaries when continuous variables were categorized<br>(c) If relevant, consider translating estimates of relative risk into absolute risk for a meaningful time period | 9  |
| Other analyses           | 17  | Report other analyses done—eg analyses of subgroups and interactions, and sensitivity analyses                                                                                                                                                                                                                                                                                                                | 10 |
| <b>Discussion</b>        |     |                                                                                                                                                                                                                                                                                                                                                                                                               |    |
| Key results              | 18  | Summarise key results with reference to study objectives                                                                                                                                                                                                                                                                                                                                                      | 11 |
| Limitations              | 19  | Discuss limitations of the study, taking into account sources of potential bias or imprecision. Discuss both direction and magnitude of any potential bias                                                                                                                                                                                                                                                    | 15 |
| Interpretation           | 20  | Give a cautious overall interpretation of results considering objectives, limitations, multiplicity of analyses, results from similar studies, and other relevant evidence                                                                                                                                                                                                                                    | 15 |
| Generalisability         | 21  | Discuss the generalisability (external validity) of the study results                                                                                                                                                                                                                                                                                                                                         | 15 |
| <b>Other information</b> |     |                                                                                                                                                                                                                                                                                                                                                                                                               |    |
| Funding                  | 22  | Give the source of funding and the role of the funders for the present study and, if applicable, for the original study on which the present article is based                                                                                                                                                                                                                                                 | 16 |

\*Give information separately for cases and controls in case-control studies and, if applicable, for exposed and unexposed groups in cohort and cross-sectional studies.

**Note:** An Explanation and Elaboration article discusses each checklist item and gives methodological background and published examples of transparent reporting. The STROBE checklist is best used in conjunction with this article (freely available on the Web sites of PLoS Medicine at <http://www.plosmedicine.org/>, Annals of Internal Medicine at <http://www.annals.org/>, and Epidemiology at <http://www.epidem.com/>). Information on the STROBE Initiative is available at [www.strobe-statement.org](http://www.strobe-statement.org).

## TRIPOD Checklist: Prediction Model Development and Validation

| Section/Topic                | Item | Checklist Item | Page                                                                                                                                                                                                  |    |
|------------------------------|------|----------------|-------------------------------------------------------------------------------------------------------------------------------------------------------------------------------------------------------|----|
| <b>Title and abstract</b>    |      |                |                                                                                                                                                                                                       |    |
| Title                        | 1    | D;V            | Identify the study as developing and/or validating a multivariable prediction model, the target population, and the outcome to be predicted.                                                          | 1  |
| Abstract                     | 2    | D;V            | Provide a summary of objectives, study design, setting, participants, sample size, predictors, outcome, statistical analysis, results, and conclusions.                                               | 2  |
| <b>Introduction</b>          |      |                |                                                                                                                                                                                                       |    |
| Background and objectives    | 3a   | D;V            | Explain the medical context (including whether diagnostic or prognostic) and rationale for developing or validating the multivariable prediction model, including references to existing models.      | 4  |
|                              | 3b   | D;V            | Specify the objectives, including whether the study describes the development or validation of the model or both.                                                                                     | 5  |
| <b>Methods</b>               |      |                |                                                                                                                                                                                                       |    |
| Source of data               | 4a   | D;V            | Describe the study design or source of data (e.g., randomized trial, cohort, or registry data), separately for the development and validation data sets, if applicable.                               | 6  |
|                              | 4b   | D;V            | Specify the key study dates, including start of accrual; end of accrual; and, if applicable, end of follow-up.                                                                                        | 6  |
| Participants                 | 5a   | D;V            | Specify key elements of the study setting (e.g., primary care, secondary care, general population) including number and location of centres.                                                          | 6  |
|                              | 5b   | D;V            | Describe eligibility criteria for participants.                                                                                                                                                       | 6  |
|                              | 5c   | D;V            | Give details of treatments received, if relevant.                                                                                                                                                     | 6  |
| Outcome                      | 6a   | D;V            | Clearly define the outcome that is predicted by the prediction model, including how and when assessed.                                                                                                | 7  |
|                              | 6b   | D;V            | Report any actions to blind assessment of the outcome to be predicted.                                                                                                                                | NA |
| Predictors                   | 7a   | D;V            | Clearly define all predictors used in developing or validating the multivariable prediction model, including how and when they were measured.                                                         | 7  |
|                              | 7b   | D;V            | Report any actions to blind assessment of predictors for the outcome and other predictors.                                                                                                            | NA |
| Sample size                  | 8    | D;V            | Explain how the study size was arrived at.                                                                                                                                                            | NA |
| Missing data                 | 9    | D;V            | Describe how missing data were handled (e.g., complete-case analysis, single imputation, multiple imputation) with details of any imputation method.                                                  | NA |
| Statistical analysis methods | 10a  | D              | Describe how predictors were handled in the analyses.                                                                                                                                                 | 9  |
|                              | 10b  | D              | Specify type of model, all model-building procedures (including any predictor selection), and method for internal validation.                                                                         | 9  |
|                              | 10c  | V              | For validation, describe how the predictions were calculated.                                                                                                                                         | 9  |
|                              | 10d  | D;V            | Specify all measures used to assess model performance and, if relevant, to compare multiple models.                                                                                                   | 9  |
|                              | 10e  | V              | Describe any model updating (e.g., recalibration) arising from the validation, if done.                                                                                                               | 9  |
| Risk groups                  | 11   | D;V            | Provide details on how risk groups were created, if done.                                                                                                                                             | 9  |
| Development vs. validation   | 12   | V              | For validation, identify any differences from the development data in setting, eligibility criteria, outcome, and predictors.                                                                         | 9  |
| <b>Results</b>               |      |                |                                                                                                                                                                                                       |    |
| Participants                 | 13a  | D;V            | Describe the flow of participants through the study, including the number of participants with and without the outcome and, if applicable, a summary of the follow-up time. A diagram may be helpful. | 10 |
|                              | 13b  | D;V            | Describe the characteristics of the participants (basic demographics, clinical features, available predictors), including the number of participants with missing data for predictors and outcome.    | 10 |
|                              | 13c  | V              | For validation, show a comparison with the development data of the distribution of important variables (demographics, predictors and outcome).                                                        | 11 |
| Model development            | 14a  | D              | Specify the number of participants and outcome events in each analysis.                                                                                                                               | 11 |
|                              | 14b  | D              | If done, report the unadjusted association between each candidate predictor and outcome.                                                                                                              | NA |
| Model specification          | 15a  | D              | Present the full prediction model to allow predictions for individuals (i.e., all regression coefficients, and model intercept or baseline survival at a given time point).                           | 12 |
|                              | 15b  | D              | Explain how to use the prediction model.                                                                                                                                                              | 12 |
| Model performance            | 16   | D;V            | Report performance measures (with CIs) for the prediction model.                                                                                                                                      | 11 |
| Model-updating               | 17   | V              | If done, report the results from any model updating (i.e., model specification, model performance).                                                                                                   | NA |
| <b>Discussion</b>            |      |                |                                                                                                                                                                                                       |    |
| Limitations                  | 18   | D;V            | Discuss any limitations of the study (such as nonrepresentative sample, few events per predictor, missing data).                                                                                      | 17 |
| Interpretation               | 19a  | V              | For validation, discuss the results with reference to performance in the development data, and any other validation data.                                                                             | 13 |
|                              | 19b  | D;V            | Give an overall interpretation of the results, considering objectives, limitations, results from similar studies, and other relevant evidence.                                                        | 13 |
| Implications                 | 20   | D;V            | Discuss the potential clinical use of the model and implications for future research.                                                                                                                 | 16 |
| <b>Other information</b>     |      |                |                                                                                                                                                                                                       |    |
| Supplementary information    | 21   | D;V            | Provide information about the availability of supplementary resources, such as study protocol, Web calculator, and data sets.                                                                         | NA |
| Funding                      | 22   | D;V            | Give the source of funding and the role of the funders for the present study.                                                                                                                         | 19 |

\*Items relevant only to the development of a prediction model are denoted by D, items relating solely to a validation of a prediction model are denoted by V, and items relating to both are denoted D;V. We recommend using the TRIPOD Checklist in conjunction with the TRIPOD Explanation and Elaboration document.
