# Supplementary material for: Development of a nomogram for the prediction of in-hospital mortality in patients with acute ST-elevation myocardial infarction after primary percutaneous coronary intervention: a multicentre, retrospective, observational study in Hebei province, China
Source: PubMed Central journal article supplement — BMJ Open. 2022 Feb 2;12(2):e056101. doi: 10.1136/bmjopen-2021-056101 (PMC8811571; doi:10.1136/bmjopen-2021-056101), 2022-02-02
Supplement: bmjopen-2021-056101supp001.pdf [file bmjopen-2021-056101supp001.pdf]

Supplement Table 1. Clinical characteristics of the patients used to construct the nomogram

| Variables                                           | Training set      |                   |                                  |          | Testing set       |                  |                                 |          |
|-----------------------------------------------------|-------------------|-------------------|----------------------------------|----------|-------------------|------------------|---------------------------------|----------|
|                                                     | All<br>(n=396)    | Survival (n=264)  | In-hospital<br>mortality (n=132) | <i>P</i> | All<br>(n=459)    | Survival (n=368) | In-hospital<br>mortality (n=91) | <i>P</i> |
| Age (years) (mean ±SD)                              | 63.3±12.7         | 60.3±12.9         | 69.3±9.8                         | <0.001   | 62.1±12.8         | 59.8±12.4        | 70.2±11.3                       | <0.001   |
| Male (n (%))                                        | 284 (71.7)        | 202 (76.5)        | 82 (62.1)                        | 0.004    | 352 (76.7)        | 294 (79.9)       | 58 (63.7)                       | 0.001    |
| BMI (kg/m <sup>2</sup> )                            | 25.8 (24.6, 26.1) | 26.0 (25.3, 26.5) | 24.9 (24.4, 25.5)                | <0.001   | 25.4 (23.4, 27.3) | 25.5±3.0         | 25.3 (23.4, 27.5)               | 0.047    |
| Cardiac arrest (n (%))                              | 10 (2.5)          | 6 (2.3)           | 4 (3.0)                          | 0.91     | 8 (1.7)           | 6 (1.6)          | 2 (2.2)                         | 0.711    |
| Cardiogenic shock before admission (n (%))          | 34 (8.6)          | 6 (2.3)           | 28 (21.2)                        | <0.001   | 30 (6.5)          | 15 (4.1)         | 15 (16.5)                       | <0.001   |
| Use of temporary pacemaker before admission (n (%)) | 3 (0.7)           | 0                 | 3 (2.3)                          | 0.065    | 4 (0.9)           | 2 (0.5)          | 2 (2.2)                         | 0.128    |
| Ventilator support before admission (n (%))         | 6 (1.5)           | 1 (0.4)           | 5 (3.8)                          | 0.029    | 7 (1.5)           | 2 (0.5)          | 5 (5.5)                         | 0.001    |
| CPR before admission                                | 12 (3.0)          | 5 (1.9)           | 7 (5.3)                          | 0.12     | 5 (1.1)           | 0                | 5 (5.5)                         | <0.001   |

|                                                  |                |                |                |        |                |                |                |        |
|--------------------------------------------------|----------------|----------------|----------------|--------|----------------|----------------|----------------|--------|
|                                                  | <b>(n (%))</b> |                |                |        |                |                |                |        |
| SBP on admission                                 |                |                |                |        |                |                |                |        |
| <b>(median (IQR))</b>                            | 128 (110, 146) | 133 (114, 149) | 118 (100, 140) | <0.001 | 125 (110, 140) | 129±25         | 121 (107, 135) | 0.009  |
| DBP on admission                                 |                |                |                |        |                |                |                |        |
| <b>(median (IQR))</b>                            | 79 (69, 89)    | 82 (72, 92)    | 73 (62, 82)    | <0.001 | 77±16          | 80±15          | 69±16          | <0.001 |
| Heart rate on admission                          |                |                |                |        |                |                |                |        |
| <b>(median (IQR))</b>                            | 77 (65, 90)    | 76 (64, 89)    | 80 (66, 96)    | 0.025  | 79±18          | 78±17          | 82±24          | 0.095  |
| Fatal arrhythmia before admission <b>(n (%))</b> | 21 (5.3)       | 15 (5.7)       | 6 (4.5)        | 0.812  | 20 (4.4)       | 12 (3.3)       | 8 (8.8)        | 0.021  |
| Total ischemic time                              |                |                |                |        |                |                |                |        |
| <b>(min (median (IQR)))</b>                      | 217 (124, 367) | 154 (95, 250)  | 360 (194, 420) | <0.001 | 211 (130, 341) | 194 (125, 307) | 300 (222, 480) | <0.001 |
| Killip class 3-4 <b>(n (%))</b>                  | 132 (33.3)     | 95 (36.0)      | 37 (28.0)      | 0.142  | 119 (25.9)     | 66 (17.9)      | 53 (58.2)      | <0.001 |
| Past medical history                             |                |                |                |        |                |                |                |        |
| <i>Hypertension (n (%))</i>                      | 211 (53.3)     | 137 (51.9)     | 74 (56.1)      | 0.499  | 73 (15.9)      | 38 (10.3)      | 35 (38.5)      | <0.001 |
| <i>DM (n (%))</i>                                | 96 (24.2)      | 49 (18.6)      | 47 (35.6)      | <0.001 | 104 (22.7)     | 84 (22.8)      | 20 (22.0)      | 0.863  |

|                                                   |           |           |           |        |           |           |           |        |
|---------------------------------------------------|-----------|-----------|-----------|--------|-----------|-----------|-----------|--------|
| <i>Hyperlipidemia (n (%))</i>                     | 39 (9.8)  | 12 (4.5)  | 27 (20.5) | <0.001 | 41 (8.9)  | 23 (6.3)  | 18 (19.8) | <0.001 |
| <i>Previous PCI (n (%))</i>                       | 18 (4.5)  | 8 (3.0)   | 10 (7.6)  | 0.073  | 23 (5.0)  | 17 (4.6)  | 6 (6.6)   | 0.44   |
| <i>Previous CABG (n (%))</i>                      | 1 (0.2)   | 0         | 1 (0.8)   | 0.157  | 1 (0.2)   | 0         | 1 (1.1)   | 0.05   |
| <i>CAD (n (%))</i>                                | 45 (11.4) | 17 (6.4)  | 28 (21.2) | <0.001 | 40 (8.7)  | 20 (5.4)  | 20 (22.0) | <0.001 |
| <i>AF (n (%))</i>                                 | 11 (2.8)  | 1 (0.4)   | 10 (7.6)  | <0.001 | 13 (2.8)  | 3 (0.8)   | 10 (11.0) | <0.001 |
| <i>HF (n (%))</i>                                 | 4 (1.0)   | 3 (1.1)   | 1 (0.8)   | 0.722  | 25 (5.4)  | 18 (4.9)  | 7 (7.7)   | 0.292  |
| <i>Renal insufficiency (n (%))</i>                | 62 (15.7) | 1 (0.4)   | 61 (46.2) | <0.001 | 13 (2.8)  | 1 (0.3)   | 12 (13.2) | <0.001 |
| <i>History of cerebrovascular disease (n (%))</i> | 64 (16.2) | 40 (15.2) | 24 (18.2) | 0.53   | 72 (15.7) | 60 (16.3) | 12 (13.2) | 0.464  |
| <i>Peripheral vascular disease (n (%))</i>        | 9 (2.3)   | 5 (1.9)   | 4 (3.0)   | 0.721  | 5 (1.1)   | 3 (0.8)   | 2 (2.2)   | 0.255  |
| <i>History of bleeding (n (%))</i>                | 2 (0.5)   | 1 (0.4)   | 1 (0.8)   | >0.999 | 7 (1.5)   | 6 (1.6)   | 1 (1.1)   | 0.711  |
| <i>Family history of CAD (n (%))</i>              | 44 (11.1) | 28 (10.6) | 16 (11.1) | 0.875  | 68 (14.8) | 62 (16.8) | 6 (6.6)   | 0.014  |
| <i>Angiographic characteristics</i>               |           |           |           |        |           |           |           |        |
| <i>Number of stents (median (IQR))</i>            | 1 (1, 1)  | 1 (1, 1)  | 1 (0, 1)  | <0.001 | 1 (1, 1)  | 1 (1, 1)  | 1 (1, 1)  | 0.137  |

|                                        |            |            |           |        |            |            |           |        |
|----------------------------------------|------------|------------|-----------|--------|------------|------------|-----------|--------|
| <i>Long lesions (n (%))</i>            | 245 (61.9) | 178 (67.4) | 67 (50.8) | 0.002  | 194 (42.3) | 131 (35.6) | 63 (69.2) | <0.001 |
| <i>Thrombus aspiration (n (%))</i>     | 123 (31.1) | 92 (34.8)  | 31 (23.5) | 0.029  | 221 (48.1) | 205 (55.7) | 16 (17.6) | <0.001 |
| <i>Residual stenosis (n (%))</i>       | 12 (3.0)   | 2 (0.8)    | 10 (7.6)  | 0.001  | 10 (2.2)   | 4 (1.1)    | 6 (6.6)   | 0.001  |
| <i>Use temporary pacemaker (n (%))</i> | 22 (5.6)   | 4 (1.5)    | 18 (13.6) | <0.001 | 9 (2.0)    | 2 (0.5)    | 7 (7.7)   | <0.001 |
| <i>IABP (n (%))</i>                    | 19 (4.8)   | 4 (1.5)    | 15 (11.4) | <0.001 | 15 (3.3)   | 4 (1.1)    | 11 (12.1) | <0.001 |
| <i>Respirator support (n (%))</i>      | 20 (5.1)   | 1 (0.4)    | 19 (14.4) | <0.001 | 13 (2.8)   | 2 (0.5)    | 11 (12.1) | <0.001 |
| <i>Pericardial aspiration (n (%))</i>  | 3 (0.8)    | 0          | 3 (2.3)   | 0.065  | 3 (0.7)    | 0          | 3 (3.3)   | <0.001 |
| <i>No flow (n (%))</i>                 | 98 (24.7)  | 48 (18.2)  | 50 (37.9) | <0.001 | 84 (18.3)  | 55 (14.9)  | 29 (31.9) | <0.001 |
| <i>Coronary perforation (n (%))</i>    | 5 (1.3)    | 0          | 5 (3.8)   | 0.001  | 2 (0.4)    | 1 (0.3)    | 1 (1.1)   | 0.283  |
| <i>Dissection (n (%))</i>              | 3 (0.8)    | 0          | 3 (2.3)   | 0.065  | 5 (1.1)    | 0          | 5 (5.5)   | <0.001 |
| <i>Pericardial tamponade (n (%))</i>   | 9 (2.3)    | 0          | 9 (6.8)   | <0.001 | 2 (0.4)    | 0          | 2 (2.2)   | 0.004  |
| <i>Acute HF (n (%))</i>                | 55 (13.9)  | 22 (8.3)   | 33 (25.0) | <0.001 | 52 (11.3)  | 30 (7.7)   | 22 (24.2) | <0.001 |
| <i>Bleeding (n (%))</i>                | 2 (0.5)    | 0          | 2 (1.5)   | 0.21   | 6 (1.3)    | 3 (0.8)    | 3 (3.3)   | 0.062  |
| <i>Cardiac arrest (n (%))</i>          | 24 (6.1)   | 1 (0.4)    | 23 (17.4) | <0.001 | 14 (3.1)   | 6 (1.6)    | 8 (8.8)   | <0.001 |
| <i>Recurrent MI (n (%))</i>            | 16 (4.0)   | 1 (0.4)    | 15 (11.4) | <0.001 | 7 (1.5)    | 2 (0.5)    | 5 (5.5)   | 0.001  |

|                                               |                   |                   |                   |        |                   |            |           |        |
|-----------------------------------------------|-------------------|-------------------|-------------------|--------|-------------------|------------|-----------|--------|
| <i>Stent thrombosis (n (%))</i>               | 8 (2.0)           | 6 (2.3)           | 2 (1.5)           | 0.9    | 14 (3.1)          | 13 (3.5)   | 1 (1.1)   | 0.227  |
| <i>Type B2-C (n (%))</i>                      | 309 (78.0)        | 213 (80.7)        | 96 (72.7)         | 0.094  | 277 (60.3)        | 230 (62.5) | 47 (51.6) | 0.058  |
| <i>TIMI flow grade 0-1 before PCI (n (%))</i> | 311 (78.5)        | 197 (74.6)        | 114 (86.4)        | 0.011  | 339 (73.9)        | 274 (74.5) | 65 (71.4) | 0.556  |
| <i>Use of GP IIb/IIIa inhibitors (n (%))</i>  | 92 (23.2)         | 54 (20.5)         | 38 (28.8)         | 0.064  | 107 (23.3)        | 80 (21.7)  | 27 (29.7) | 0.109  |
| <i>multivessel CAD (n (%))</i>                | 316 (79.8)        | 207 (78.4)        | 109 (82.6)        | 0.33   | 373 (81.3)        | 296 (80.4) | 77 (84.6) | 0.36   |
| <i>LAD (n (%))</i>                            | 149 (37.6)        | 85 (32.2)         | 64 (48.5)         | 0.002  | 209 (45.5)        | 177 (48.1) | 32 (35.2) | 0.027  |
| <i>LCX (n (%))</i>                            | 59 (14.9)         | 39 (14.8)         | 20 (15.2)         | 0.921  | 64 (13.9)         | 46 (12.5)  | 18 (19.8) | 0.072  |
| <i>RCA (n (%))</i>                            | 101 (25.5)        | 101 (38.3)        | 40 (30.3)         | 0.119  | 144 (31.4)        | 120 (32.6) | 24 (26.4) | 0.251  |
| <b>Biochemical markers</b>                    |                   |                   |                   |        |                   |            |           |        |
| <i>Hyperkalemia (n (%))</i>                   | 36 (9.1)          | 3 (1.1)           | 33 (25.0)         | <0.001 | 30 (6.5)          | 11 (3.0)   | 19 (20.9) | <0.001 |
| <i>Hyponatremia (n (%))</i>                   | 29 (7.3)          | 12 (4.5)          | 19 (14.4)         | 0.001  | 37 (8.1)          | 31 (8.4)   | 6 (6.6)   | 0.566  |
| <i>Anemia (n (%))</i>                         | 26 (6.6)          | 12 (4.5)          | 14 (10.6)         | 0.022  | 40 (8.7)          | 21 (5.7)   | 19 (20.9) | <0.001 |
| <i>Creatinine (median (IQR))</i>              | 86.2 (76.9, 90.6) | 86.2 (70.6, 86.2) | 90.6 (77.0, 95.5) | 0.111  | 92.5 (64.5, 93.0) | 85.1±32.1  | 91.1±53.5 | 0.17   |

|                                                                 |                      |                      |                      |        |                      |                      |                      |        |
|-----------------------------------------------------------------|----------------------|----------------------|----------------------|--------|----------------------|----------------------|----------------------|--------|
| <i>N/L ratio (median (IQR))</i>                                 | 5.47 (2.82, 10.00)   | 4.70 (2.68, 7.87)    | 8.54 (3.19, 11.46)   | <0.001 | 6.15 (3.48, 9.52)    | 5.08 (3.65, 9.46)    | 9.1 (3.81, 12.51)    | <0.001 |
| <i>HCT, % (median (IQR))</i>                                    | 41.0 (37.1, 44.0)    | 41.8 (38.0, 44.6)    | 38.5 (36.8, 41.3)    | <0.001 | 40.4 (37.4, 44.5)    | 40.0±5.2             | 38.0 (32.7, 43.3)    | <0.001 |
| <i>HGB, g/L (median (IQR))</i>                                  | 137.0 (126.0, 269.0) | 142.0 (129.0, 155.0) | 129.0 (119.0, 137.3) | <0.001 | 137.2±19.8           | 138.5±19.1           | 131.9±21.5           | 0.004  |
| <i>PLT, ×10<sup>9</sup>/L (median (IQR))</i>                    | 221.0 (183.5, 269.0) | 224.0 (186.0, 269.0) | 227.0 (194.8, 246.3) | 0.554  | 225.0 (184.0, 260.0) | 229.0 (187.0, 264.0) | 215.0 (175.0, 254.0) | 0.151  |
| <i>Random blood glucose on admission, mmol/L (median (IQR))</i> | 6.84 (5.47, 9.92)    | 5.95 (5.02, 7.44)    | 9.81 (7.96, 11.04)   | <0.001 | 6.73 (5.27, 10.10)   | 6.12 (5.10, 8.10)    | 10.96 (8.40, 11.78)  | <0.001 |
| <i>EF after PCI (median (IQR))</i>                              | 51.0 (43.0, 58.0)    | 54.0 (47.8, 59.0)    | 43.0 (38.0, 48.5)    | <0.001 | 55 (46, 60)          | 56 (51, 61)          | 45 (37, 53)          | <0.001 |
| Medication list on admission                                    |                      |                      |                      |        |                      |                      |                      |        |
| <i>(n (%))</i>                                                  |                      |                      |                      |        |                      |                      |                      |        |
| <i>Aspirin</i>                                                  | 379 (95.7)           | 262 (99.2)           | 117 (88.6)           | <0.001 | 404 (88.0)           | 332 (90.2)           | 72 (79.1)            | 0.004  |
| <i>Ticagrelor/clopidogrel</i>                                   | 393 (99.2)           | 262 (99.2)           | 131 (99.2)           | >0.999 | 418 (91.1)           | 332 (90.2)           | 86 (94.5)            | 0.199  |

|                                                  |            |            |           |        |            |            |           |        |
|--------------------------------------------------|------------|------------|-----------|--------|------------|------------|-----------|--------|
| <i>Ticagrelor</i>                                | 223 (56.3) | 162 (61.4) | 61 (46.2) |        | 218 (47.5) | 183 (49.7) | 35 (38.5) |        |
| <i>clopidogrel</i>                               | 170 (42.9) | 100 (37.9) | 70 (53.0) |        | 200 (43.6) | 149 (40.5) | 51 (56.0) |        |
| <i>ACEI/ARB</i>                                  | 133 (33.6) | 100 (37.9) | 33 (25.0) | 0.014  | 25 (5.4)   | 18 (4.9)   | 7 (7.7)   | 0.292  |
| <i>β-Blocker</i>                                 | 92 (23.2)  | 66 (25.0)  | 26 (19.7) | 0.239  | 37 (8.1)   | 29 (7.9)   | 8 (8.9)   | 0.753  |
| <i>Statin</i>                                    | 188 (47.5) | 130 (49.2) | 58 (43.9) | 0.319  | 206 (44.9) | 181 (49.2) | 25 (27.5) | <0.001 |
| mean duration of hospital stay<br>(median (IQR)) | 8.51±5.11  | 9 (9,11)   | 1 (1,4)   | <0.001 | 8.32±4.70  | 9 (8,11)   | 2 (1,5)   | <0.001 |

BMI: body mass index; SBP: systolic blood pressure; DBP: diastolic blood pressure; DM: diabetes mellitus; PCI: percutaneous coronary intervention; CABG: coronary artery bypass graft; CAD: coronary atherosclerotic heart disease; AF: atrial fibrillation; HF: heart failure; IABP: intra-aortic balloon pump; MI: myocardial infarction; LAD: left anterior descending branch; LCX: left circumflex artery; RCA: right coronary artery; N/L ratio: neutrophils/lymphocytes ratio; HCT: hematocrit; HGB: hemoglobin; PLT: platelets; EF: ejection fraction; ACEI: angiotensin-converting enzyme inhibitor; ARB: angiotensin receptor blocker.
